# Supplementary material for: An integrative model of cardiometabolic traits identifies two types of metabolic syndrome
Source: eLife journal article supplement (doi:10.7554/elife.61710), 2021-01-28
Supplement: supp [file elife-61710-supp-v1.zip]

Archive with 18 entries (18 files):
- elife_poa_e61710_Transparent_Reporting_File.docx
- elife_poa_e61710_Supplementary_file_1.xlsx
- elife_poa_e61710_Supplementary_file_2.xlsx
- elife_poa_e61710_Figure_1_figure_supplement_1.pdf
- elife_poa_e61710_Figure_1_figure_supplement_2.pdf
- elife_poa_e61710_Figure_1_figure_supplement_3.pdf
- elife_poa_e61710_Figure_1_figure_supplement_4.pdf
- elife_poa_e61710_Figure_1_figure_supplement_5.pdf
- elife_poa_e61710_Figure_2_figure_supplement_1.pdf
- elife_poa_e61710_Figure_2_figure_supplement_2.pdf
- elife_poa_e61710_Figure_2_figure_supplement_3.pdf
- elife_poa_e61710_Figure_3_figure_supplement_1.pdf
- elife_poa_e61710_Figure_3_figure_supplement_2.pdf
- elife_poa_e61710_Figure_3_figure_supplement_3.pdf
- elife_poa_e61710_Figure_4_figure_supplement_1.pdf
- elife_poa_e61710_Figure_5_figure_supplement_1.pdf
- elife_poa_e61710_Figure_5_figure_supplement_2.pdf
- elife_poa_e61710_Figure_5_figure_supplement_3.pdf
