# Supplementary material for: An integrative model of cardiometabolic traits identifies two types of metabolic syndrome
Source: eLife journal article supplement (doi:10.7554/elife.61710), 2021-01-28
Supplement: supp [file elife-61710-supp-v1.zip › elife_poa_e61710_Supplementary_file_1.xlsx]

## Sheet: SuppTable1A
Supplementary Table 1A
Individual	Gender	Age (yrs)	BMI	Diabetes	Atherosclerosis	Maximum plaque thickness	Maximum stenosis	Number of plaques
C001	F	71	29	No	No	0	0	0
C002	M	73	28	No	No	0	0	0
C006	M	70	32	No	No	0	0	0
C007	M	65	43	No	No	0	0	0
C008	F	60	31	No	No	0	0	0
C009	F	65	30	No	No	0	0	0
C010	M	66	30	No	No	0	0	0
C011	M	69	31	No	No	0	0	0
C012	M	58	28	No	No	0	0	0
C013	M	64	29	No	No	0	0	0
C014	M	60	39	No	No	0	0	0
C016	M	72	29	No	No	0	0	0
C018	F	62	29	No	No	0	0	0
C019	M	61	35	Yes	No	0	0	0
C020	F	64	30	No	No	0	0	0
C023	M	63	32	No	No	0	0	0
C025	F	59	28	No	No	0	0	0
C028	F	68	30	No	No	0	0	0
C029	F	74	31	No	No	0	0	0
C030	M	62	34	No	No	0	0	0
C032	M	60	30	No	No	0	0	0
C035	M	73	31	No	No	0	0	0
C037	F	70	29	No	No	0	0	0
C042	M	62	42	No	No	0	0	0
C045	M	67	29	No	No	0	0	0
C048	M	66	31	No	No	0	0	0
C049	M	66	28	No	No	0	0	0
C050	F	61	29	No	No	0	0	0
C051	F	70	29	No	No	0	0	0
C053	F	62	28	Yes	No	0	0	0
C058	F	71	31	No	No	0	0	0
C063	F	64	33	No	No	0	0	0
C064	F	72	31	No	No	0	0	0
C065	M	64	28	No	No	0	0	0
C068	M	64	32	No	No	0	0	0
C069	F	67	28	No	No	0	0	0
C070	M	66	29	No	No	0	0	0
C072	M	69	30	No	No	0	0	0
C073	M	71	37	No	No	0	0	0
C074	F	67	30	No	No	0	0	0
C076	M	70	30	No	No	0	0	0
C077	F	68	27	No	No	0	0	0
C079	F	61	30	No	No	0	0	0
C081	F	65	40	Yes	No	0	0	0
C083	F	74	29	No	No	0	0	0
C085	M	69	28	No	No	0	0	0
C086	M	66	27	No	No	0	0	0
C087	F	63	33	No	No	0	0	0
C088	M	68	45	No	No	0	0	0
C089	M	61	29	No	No	0	0	0
C097	M	69	26	No	No	0	0	0
C099	F	67	31	No	No	0	0	0
C100	M	64	29	Yes	No	0	0	0
C101	M	72	32	No	No	0	0	0
C102	F	65	32	Yes	No	0	0	0
C103	M	60	31	No	No	0	0	0
C104	M	60	34	Yes	No	0	0	0
C105	F	64	29	No	No	0	0	0
C106	M	64	28	No	No	0	0	0
C108	M	60	32	No	No	0	0	0
C110	F	64	37	No	No	0	0	0
C111	M	61	28	Yes	No	0	0	0
C113	M	67	39	No	No	0	0	0
C115	F	60	34	Yes	No	0	0	0
C118	M	76	33	No	No	0	0	0
C120	F	61	28	No	No	0	0	0
C121	F	61	44	No	No	0	0	0
C122	F	64	29	No	No	0	0	0
C124	M	70	29	No	No	0	0	0
C128	F	68	28	No	No	0	0	0
C131	F	63	27	No	No	0	0	0
C132	M	69	29	No	No	0	0	0
C136	F	66	30	No	No	0	0	0
C137	M	66	30	No	No	0	0	0
C140	F	67	28	No	No	0	0	0
C143	F	68	32	No	No	0	0	0
C145	M	66	29	No	No	0	0	0
C146	F	76	29	No	No	0	0	0
C157	M	63	40	No	No	0	0	0
C162	F	67	28	No	No	0	0	0
C167	F	70	28	No	No	0	0	0
C172	M	59	28	No	No	0	0	0
C173	M	61	28	Yes	No	0	0	0
C177	F	59	31	No	No	0	0	0
C178	M	60	27	No	No	0	0	0
C181	F	74	28	No	No	0	0	0
C182	F	70	28	No	No	0	0	0
C184	F	61	28	No	No	0	0	0
C187	M	67	28	No	No	0	0	0
C188	F	61	29	No	No	0	0	0
C190	M	63	28	No	No	0	0	0
C192	M	64	27	No	No	0	0	0
C194	M	61	29	No	No	0	0	0
C195	M	67	28	No	No	0	0	0
C197	F	62	30	No	No	0	0	0
C198	F	69	28	No	No	0	0	0
C203	F	66	28	No	No	0	0	0
C204	M	78	29	No	No	0	0	0
C205	M	59	28	No	No	0	0	0
C206	M	53	32	No	No	0	0	0
C207	F	69	36	No	No	0	0	0
C208	M	60	30	No	No	0	0	0
C211	F	58	33	No	No	0	0	0
C213	F	70	30	No	No	0	0	0
C216	M	71	28	No	No	0	0	0
C217	M	64	36	Yes	No	0	0	0
C218	M	67	31	No	No	0	0	0
C219	F	63	27	No	No	0	0	0
C220	F	63	31	No	No	0	0	0
C222	M	56	30	No	No	0	0	0
C226	F	61	29	No	No	0	0	0
C236	M	61	32	Yes	No	0	0	0
C240	M	59	30	No	No	0	0	0
C243	F	62	36	Yes	No	0	0	0
C245	M	61	27	No	No	0	0	0
C246	M	70	27	No	No	0	0	0
C247	M	68	30	No	No	0	0	0
C252	M	57	35	No	No	0	0	0
C253	F	72	28	No	No	0	0	0
C254	F	60	28	No	No	0	0	0
C255	M	59	31	No	No	0	0	0
C257	M	76	30	Yes	No	0	0	0
C266	M	59	34	No	No	0	0	0
C267	M	61	28	No	No	0	0	0
C269	F	65	40	No	No	0	0	0
C272	F	66	31	No	No	0	0	0
C273	M	64	27	No	No	0	0	0
C274	M	68	33	Yes	No	0	0	0
C276	F	66	31	No	No	0	0	0
C281	F	74	29	No	No	0	0	0
C282	M	68	28	No	No	0	0	0
C283	F	62	27	No	No	0	0	0
C284	F	68	26	No	No	0	0	0
C290	F	63	30	No	No	0	0	0
C291	F	69	32	No	No	0	0	0
C296	F	72	28	No	No	0	0	0
C298	F	61	32	No	No	0	0	0
C299	F	73	31	No	No	0	0	0
C300	F	67	37	No	No	0	0	0
C301	F	73	31	No	No	0	0	0
C003	M	76	29	Yes	Yes	2.7		1
C004	F	66	33	No	Yes	1.6		1
C005	M	62	34	No	Yes	1.2		1
C015	M	65	28	Yes	Yes	2.4		1
C017	M	65	27	No	Yes	5.1	0	1
C021	M	73	29	Yes	Yes	2.8		1
C022	F	58	27	No	Yes	1.7		2
C024	M	66	28	No	Yes	3		2
C026	F	70	29	No	Yes	1.5		1
C027	F	59	32	No	Yes	1.2		1
C031	M	61	30	No	Yes	2.9	0.485981	2
C033	F	69	30	No	Yes	1.3	0.188406	1
C034	M	67	29	No	Yes	2.4		1
C036	M	59	32	No	Yes	2.2		1
C038	M	59	29	No	Yes	1.7		2
C039	F	76	30	No	Yes	3.3		2
C040	F	77	30	No	Yes	3.3	0.484848	2
C041	F	65	33	No	Yes	2.2		1
C043	F	74	27	No	Yes	2.8		1
C044	F	60	31	No	Yes	1.4		1
C046	M	62	28	No	Yes	1.8	0.171053	2
C047	F	67	41	No	Yes	2.9		1
C052	M	65	34	No	Yes	2.1	0.244186	1
C054	F	67	30	No	Yes	2.4	0.282353	1
C055	M	74	31	No	Yes	3.2	0.444444	3
C056	F	62	29	No	Yes	1.8	0.233766	1
C057	M	63	28	No	Yes	3.3	0.354839	1
C059	F	75	28	No	Yes	2	0.3125	2
C060	F	75	32	Yes	Yes	3.7	0.506849	3
C061	F	63	30	No	Yes	2.4	0.323529	2
C062	F	70	28	No	Yes	2.2	0.305556	2
C066	M	64	28	No	Yes	1.3	0.139785	1
C067	M	66	31	No	Yes	2.9	0.414286	2
C071	F	74	29	No	Yes	3.2		1
C075	M	66	32	Yes	Yes	1.7	0.168317	1
C078	F	67	28	No	Yes	2.8	0.460674	1
C080	M	73	34	No	Yes	3.3	0.3	2
C082	F	77	30	No	Yes	3.2	0.463768	2
C084	F	71	36	Yes	Yes	2.2	0.21519	2
C090	F	65	29	No	Yes	1.6	0.353659	1
C091	M	60	30	No	Yes	2	0.26087	3
C092	M	65	29	No	Yes	2	0.21978	1
C093	M	72	29	No	Yes	3.3	0.554348	3
C094	M	76	33	No	Yes	2.6	0.412698	3
C095	F	64	27	No	Yes	1.5	0.180723	1
C096	M	64	27	Yes	Yes	3.6	0.444444	3
C098	M	69	28	No	Yes	2.1	0.259259	1
C107	F	69	32	No	Yes	1.9	0.363636	1
C109	M	70	37	Yes	Yes	1.6	0.181818	1
C112	M	68	38	No	Yes	3.1	0.382716	1
C114	M	61	30	No	Yes	1.7	0.191011	1
C116	M	77	34	No	Yes	2.7	0.38806	3
C117	M	77	33	Yes	Yes	2	0.217391	2
C119	M	67	32	No	Yes	2	0.294118	2
C123	M	66	27	No	Yes	1.4	0.141414	1
C125	M	71	29	No	Yes	2.6	0.366197	1
C126	M	69	32	No	Yes	1.8	0.211765	1
C127	F	65	41	No	Yes	1.2		1
C129	M	68	29	No	Yes	2.5	0.290698	1
C130	F	68	34	No	Yes	2.3	0.267442	2
C133	M	70	27	No	Yes	2.2		1
C134	M	64	28	No	Yes	2.4	0.289157	1
C135	F	60	34	No	Yes	1.7	0.223684	1
C138	F	63	34	No	Yes	3.2	0.552083	2
C139	M	78	31	No	Yes	3.2	0.372093	3
C141	M	72	28	Yes	Yes	4.2	0.6875	2
C142	M	60	29	No	Yes	2.3	0.291139	1
C144	M	71	32	No	Yes	2.8	0.333333	2
C147	F	72	31	No	Yes	2.7	0.391304	2
C148	F	75	33	No	Yes	3.2		1
C149	F	67	31	No	Yes	2.9	0.446809	2
C150	M	76	28	No	Yes	1.8	0.313043	2
C151	F	69	30	No	Yes	1.8	0.222222	1
C152	F	72	29	No	Yes	1.9	0.193878	1
C153	M	62	27	No	Yes	3.1	0.349398	3
C154	M	62	28	No	Yes	3.7	0.293651	1
C155	M	60	32	No	Yes	3.3	0.417722	1
C156	M	68	31	No	Yes	1.6	0.351648	2
C158	M	59	28	No	Yes	2.5	0.357143	2
C159	M	60	30	No	Yes	1.9	0.218391	1
C160	M	72	30	No	Yes	3.1	0.252033	1
C161	F	73	28	No	Yes	2.7	0.226891	1
C163	M	62	32	No	Yes	4	0.344828	2
C164	M	58	31	No	Yes	2.1	0.272727	1
C165	F	68	43	No	Yes	2.8	0.314607	1
C166	F	63	29	No	Yes	1.5	0.170455	1
C168	F	65	33	Yes	Yes	2.8	0.447917	2
C169	M	70	33	No	Yes	2.7	0.478261	5
C170	F	67	41	No	Yes	1.9	0.267606	1
C171	F	64	45	Yes	Yes	3.7	0.536232	2
C174	M	74	31	No	Yes	2.2	0.241758	1
C175	M	70	28	Yes	Yes	2.2	0.26506	2
C176	F	62	35	No	Yes	1.5	0.202703	1
C179	M	70	31	Yes	Yes	3.3	0.370787	3
C180	M	70	33	No	Yes	2.2	0.231579	1
C183	M	68	27	No	Yes	1.5	0.280374	1
C185	M	68	28	No	Yes	6	0.659341	2
C186	F	66	26	No	Yes	2	0.338983	2
C189	M	65	27	No	Yes	2.8	0.388889	1
C191	F	69	32	No	Yes	3.4	0.4	2
C193	M	77	29	No	Yes	2	0.253165	1
C196	M	61	33	No	Yes	2.3	0.369369	2
C199	M	75	30	No	Yes	2.4	0.244898	2
C200	M	67	29	No	Yes	2.5	0.268817	2
C201	F	59	30	No	Yes	1.9	0.22093	1
C202	F	77	32	No	Yes	2.4	0.32	1
C209	F	72	29	No	Yes	4.1	0.78	2
C210	M	73	28	No	Yes	1.4	0.126126	1
C212	M	58	35	Yes	Yes	2	0.194175	1
C214	M	58	27	No	Yes	3.4	0.395349	1
C215	M	64	28	Yes	Yes	1.2	0.210526	1
C221	F	77	38	Yes	Yes	2.5	0.337838	2
C223	M	79	30	No	Yes	2.6	0.325	2
C224	F	63	30	No	Yes	2.9	0.391892	2
C225	M	66	29	No	Yes	2.6	0.268041	2
C227	M	63	35	No	Yes	3.3	0.392857	2
C228	F	58	27	No	Yes	1.5		1
C229	M	67	27	No	Yes	1.7	0.283333	1
C230	F	65	35	No	Yes	2.7	0.3	1
C231	F	62	28	No	Yes	1.9	0.45122	2
C232	M	61	28	No	Yes	1.5	0.138889	1
C233	M	58	31	No	Yes	1.8	0.160714	2
C234	M	65	29	No	Yes	2.5	0.5	2
C235	F	73	30	No	Yes	2.4	0.32	1
C237	M	69	33	No	Yes	1.7	0.195402	1
C238	M	67	38	Yes	Yes	2.8	0.403361	2
C239	M	63	30	Yes	Yes	1.6	0.177778	1
C241	F	62	34	No	Yes	1.7	0.197674	1
C242	M	67	28	No	Yes	2.6	0.320988	1
C244	M	72	33	No	Yes	5	0.632911	2
C248	M	67	29	No	Yes	3.2	0.376471	1
C249	M	74	30	No	Yes	1.9	0.234568	1
C250	F	71	40	No	Yes	1.8	0.197802	1
C251	M	77	32	No	Yes	2.3	0.232323	2
C256	F	76	28	Yes	Yes	3.2	0.380952	1
C258	F	72	28	No	Yes	4	0.540541	1
C259	F	76	30	No	Yes	2.1	0.269231	2
C260	F	73	32	Yes	Yes	3.5	0.443038	2
C261	F	67	27	No	Yes	2.9	0.428571	2
C262	M	62	34	No	Yes	1.8		1
C263	M	56	31	No	Yes	1.8	0.219512	2
C264	M	74	30	No	Yes	4.3	0.611111	3
C265	F	78	30	No	Yes	2.5	0.263158	1
C268	M	64	28	No	Yes	2	0.27027	1
C270	F	62	28	No	Yes	2.9	0.408451	2
C271	M	61	32	No	Yes	1.8	0.195652	1
C275	M	66	27	No	Yes	2	0.229885	2
C277	F	60	30	Yes	Yes	2.2		1
C278	M	73	31	No	Yes	2.4	0.263736	2
C279	M	64	31	No	Yes	2.5	0.436893	2
C280	F	57	33	No	Yes	1.7		1
C285	M	56	31	No	Yes	2.3	0.270588	2
C286	F	66	29	No	Yes	1.9	0.195876	1
C287	M	58	30	No	Yes	2.2	0.305556	1
C288	M	66	32	No	Yes	1.5	0.294118	2
C289	M	68	33	No	Yes	2.6	0.262626	1
C292	F	67	33	Yes	Yes	1.9	0.218391	1
C293	M	61	30	No	Yes	1.9	0.256757	1
C294	F	59	28	No	Yes	1.7	0.30303	1
C295	M	63	29	No	Yes	3	0.4	2
C297	F	76	29	No	Yes	2.9	0.6375	2
C302	F	64	29	No	Yes	1.5	0.180723	1

## Sheet: SuppTable1B
Supplementary Table 1B
Individual	Gender	Age (yrs)	BMI
HV1	M	27	22.0932
HV2	M	26	21.4619
HV3	F	24	22.7204
HV4	F	20	21.7181
HV5	F	22	20.1995
HV6	F	24	20.5499
HV7	M	23	23.6003
HV8	M	25	22.8395
HV9	M	30	24.281
HV11	F	23	25.0135
HV12	F	22	20.3816
HV13	F	24	24.8356
HV14	M	69	25.0829
HV15	M	26	23.2005
HV16	F	25	27.0416
HV17	F	27	21.4996
HV18	F	32	23.3067
HV19	M	22	25.7959
HV20	M	63	24.0741
HV21	M	22	25.7122
HV22	F	20	19.4771
HV23	M	28	22.6347
HV24	M	56	24.5435
HV26	F	22	23.8895
HV27	F	21	22.5981
HV28	F	29	21.4533
HV29	M	24	27.4445
HV30	F	25	21.9899
HV31	F	21	20.3704
HV32	M	26	24.0741
HV33	F	21	23.1405
HV34	F	19	22.1453
HV35	M	23	22.2222
HV36	M	25	23.5666
HV37	F	53	21.7993
HV38	F	25	33.0237
HV39	M	21	24.9836
HV41	F	23	24.2513
HV42	F	19	18.1252
HV43	M	18	15.0948
HV44	F	19	20.4294
HV45	M	19	22.6422
HV46	F	23	20.5191
HV47	F	21	19.2894
HV48	F	22	23.7387
HV49	M	24	22.0932
HV50	F	19	24.6755
HV51	F	20	23.1837
HV52	F	21	24.6097
HV53	F	19	18.0427
HV54	M	18	19.3213
HV55	M	23	23.8367
HV56	F	19	18.6214
HV57	M	22	21.6049
HV58	M	24	22.9926
HV59	F	22	22.31
HV60	M	31	26.3094
HV61	F	20	20.3223
HV62	M	25	25.464
HV63	M	23	23.2317
HV65	M	23	22.25
HV67	M	21	21.4619
HV68	F	23	20.898
HV69	F	23	20.202
HV71	M	47	27.4406
HV72	M	19	21.6788
HV73	F	20	20.7967
HV75	M	27	21.847
HV76	F	21	20.7008
HV77	F	19	20.6575
HV78	M	20	22.5981
HV79	F	19	21.4533
HV80	M	22	21.6788
HV81	F	25	24.6097
HV83	F	25	19.8347
HV85	M	21	20.7451
HV87	F	26	21.0077
HV88	F	20	22.7732
HV89	M	25	20.1995
HV90	F	19	22.2041
HV92	F	27	22.6474
HV93	F	27	20.3074
HV94	F	24	20.6612
HV95	F	24	20.6852
HV97	F	19	21.7993
HV100	M	32	28.0497
HV101	F	24	19.9219
HV102	M	20	24.811
HV103	F	22	21.5645
HV104	M	26	26.0299
HV106	M	24	22.9176
HV107	M	20	19.6052
HV108	F	19	24.7409
HV110	F	20	22.5306
HV112	F	20	24.0346
HV113	F	50	23.0518
HV114	F	21	21.2228
HV115	F	21	20.1092
HV116	M	23	23.04
HV117	F	22	19.9573
HV118	M	26	22.3435
HV119	F	20	20.9573
HV120	F	21	28.9051
HV121	M	19	22.5309
HV122	M	22	22.9441
HV123	F	24	21.6713
HV124	M	24	25.7122
HV126	M	61	19.6232
HV127	M	30	23.9591
HV128	F	25	19.6052
HV129	M	26	22.7244
HV130	M	18	24.5156
HV131	F	22	20.1995
HV132	F	21	20.4382
HV133	M	33	23.0388
HV134	M	36	24.4536
HV135	M	23	21.7994
HV136	F	19	24.5089
HV137	F	24	22.7244
HV138	F	23	20.5499
HV139	F	25	20.0617
HV140	M	27	24.114
HV141	M	24	22
HV142	F	26	20.2449
HV144	F	27	24.4646
HV145	M	20	16.598
HV146	F	24	20.9366
HV147	F	20	19.4932
HV148	M	19	24.8584
HV149	F	23	24.5243
HV150	M	26	20.6612
HV151	M	29	26.2773
HV152	F	26	21.4533
HV153	M	24	29.1545
HV154	F	28	22.0932
HV155	M	65	24.6914
HV157	M	21	19.9744
HV158	F	19	19.0381
HV159	M	25	21.9365
HV160	F	19	23.6614
HV161	F	24	21.3839
HV162	M	37	22.8395
HV163	F	24	23.2438
HV164	M	23	20.5897
HV165	F	19	25.1808
HV166	M	24	24.0238
HV167	M	33	21.22
HV168	F	33	18.5132
HV169	M	60	25.5036
HV170	F	24	23.1834
HV171	M	66	23.4075
HV172	M	23	24.0493
HV173	M	21	24.5693
HV174	M	22	25.464
HV175	M	22	22.8395
HV176	M	19	26.8745
HV177	F	21	24.2215
HV179	F	21	21.5645
HV180	M	23	22.2041
HV181	M	23	23.0257
HV182	F	23	20.4783
HV183	F	19	19.6072
HV184	M	69	23.8754
HV185	F	23	24.2123
HV186	M	69	21.9292
HV187	F	20	21.9713
HV188	F	20	25.2826
HV189	F	22	20.5049
HV190	F	19	22.46
HV191	F	19	20.3074
HV192	F	19	20.3074
HV193	F	19	24.4473
HV194	F	22	20.6852
HV195	F	26	21.0938
HV196	F	23	20.8086
HV197	F	19	22.6757
HV198	F	23	18.0427
HV199	F	55	28.9811
HV200	M	26	20.8307
HV201	M	21	25.0829
HV202	F	27	21.1073
HV203	M	21	23.8895
HV204	F	20	22.8625
HV205	F	21	26.8544
HV207	F	27	22.2753
HV208	M	22	17.9151
HV209	F	31	21.6296
HV210	F	19	21.2245
HV211	M	19	24.8792
HV212	F	34	21.4619
HV213	F	21	24.1633
HV214	F	49	20.5693
HV215	M	29	20.6038
HV217	M	20	24.8584
HV218	M	25	21.7365
HV219	M	55	24.2803
HV220	M	26	23.0257
HV221	M	23	30.0712
HV223	F	19	22.1297
HV224	M	21	21.6788
HV226	M	24	24.5351
HV228	F	20	20.1092
HV229	M	27	21.9021
HV232	F	24	27.7634
HV233	F	24	22.9854
HV234	F	30	22.1297
HV235	F	24	21.4692
HV236	F	23	20.5693
HV237	M	68	25.6173
HV240	M	29	20.2449
HV242	M	23	22.4467
HV243	F	58	31.7083
HV244	F	21	19.8347
HV245	F	57	28.9811
HV246	F	51	24.2215
HV247	M	18	21.9138
HV248	F	24	20.4382
HV249	F	50	29.685
HV251	F	23	21.4692
HV252	M	20	22.9926
HV254	F	49	22.448
HV256	F	22	20.5499
HV257	M	23	25.4752
HV258	M	21	23.597
HV259	F	21	22.0522
HV260	M	22	19.8025
HV261	F	19	23.5078
HV263	M	20	23.6248
HV265	F	65	20.8325
HV266	F	23	22.3214
HV267	M	23	19.3698
HV269	F	22	21.048
HV270	F	23	18.937
HV271	F	18	21.3039
HV272	F	19	19.6072
HV273	M	19	22.6422
HV274	F	24	23.2335
HV276	F	22	22.32
HV277	M	21	20.2336
HV278	F	21	22.0968
HV279	F	22	21.2245
HV280	M	20	23.2959
HV282	F	59	20.2812
HV283	F	24	19.8407
HV285	F	22	20.7157
HV286	F	22	20.9573
HV287	F	18	17.7086
HV288	F	19	23.6652
HV291	F	20	18.3058
HV292	M	24	21.22
HV293	F	21	22.7732
HV294	F	20	19.721
HV295	F	20	18.3391
HV296	F	21	23.7812
HV297	M	65	25.7704
HV298	F	69	24.6097
HV299	M	70	25.3934
HV300	F	19	26.3958
HV301	M	67	25.2493
HV302	M	62	20.1995
HV304	M	28	31.1227
HV305	F	23	22.7903
HV306	F	21	21.2245
HV307	F	64	25.7117
HV308	F	23	20.9366
HV309	M	48	24.4193
HV310	M	20	23.9395
HV314	M	18	22.5878
HV315	F	18	21.4533
HV316	F	64	23.0518
HV318	F	66	24.677
HV319	F	21	25.3086
HV320	F	20	21.1389
HV321	F	19	20.3244
HV323	F	19	20.3816
HV324	M	20	21.4771
HV325	M	54	28.089
HV326	M	23	22.1158
HV327	F	22	22.0317
HV328	M	19	17.2707
HV329	F	22	23.246
HV330	M	24	22.1607
HV331	M	20	26.2507
HV332	M	54	28.0822
HV333	F	25	21.9138
HV334	F	64	28.3447
HV335	M	28	34.4161
HV337	F	22	20.148
HV338	M	28	23.246
HV339	M	23	21.7456
HV340	F	20	18.5185
HV342	M	20	27.7008
HV343	M	24	24.6986
HV344	M	18	18.524
HV345	F	25	22.0384
HV346	F	21	21.2585
HV347	F	21	21.3839
HV348	M	19	17.4267
HV349	F	28	24.5675
HV350	F	38	28.7197
HV351	F	61	21.0772
HV352	M	25	25.9259
HV353	M	22	21.276
HV354	M	22	25.6173
HV356	M	20	25.7704
HV357	M	24	27.1267
HV358	M	33	22.9917
HV359	M	29	23.3556
HV360	F	24	20.7031
HV361	M	26	28.7274
HV362	F	48	24.3824
HV363	F	25	24.3911
HV364	M	25	25.7552
HV365	F	23	22.0317
HV366	M	25	20.1092
HV368	F	26	21.3039
HV369	M	20	22.3954
HV370	F	21	26.2596
HV371	F	21	20.0288
HV372	M	25	21.4346
HV373	M	27	24.2123
HV374	M	45	23.7654
HV375	F	21	20.5151
HV376	M	32	22.4982
HV377	M	28	28.4055
HV378	M	23	20.8117
HV379	F	21	21.9671
HV380	M	48	31.3123
HV382	M	19	24.0741
HV383	F	21	19.9184
HV384	M	24	23.1241
HV385	F	24	23.0518
HV386	F	20	22.8395
HV387	M	24	20.5643
HV388	M	26	23.8367
HV389	F	26	18.8324
HV390	M	22	26.8687
HV391	M	40	20.7161
HV392	F	70	27.852
HV393	M	18	21.8277
HV394	M	24	22.2222
HV395	M	23	19.5918
HV396	F	29	18.5568
HV397	M	27	23.5479
HV398	F	52	22.68
HV399	M	20	22.921
HV400	M	32	20.1459
HV401	F	24	22.8624
HV402	F	21	19.3698
HV403	M	21	22.7904
HV404	M	26	20.227
HV405	F	23	24.0569
HV406	F	39	22.8395
HV407	F	33	20.7564
HV408	F	23	22.1367
HV409	F	52	20.6758
HV410	M	24	19.5918
HV412	F	33	18.4139
HV413	M	29	24.3072
HV414	F	33	23.6244
HV415	M	66	24.6914
HV416	M	26	21.3453
HV417	F	61	24.4646
HV418	M	25	21.7365
HV419	M	26	21.1327
HV421	F	22	21.4533
HV423	F	68	21.1927
HV424	F	23	19.052
HV425	F	62	25.5296
HV426	F	58	21.9525
HV427	F	28	20.7476
HV428	F	57	25.9516
HV429	F	21	20.1092
HV430	M	20	19.7133
HV431	F	21	22.3081
HV432	M	18	24.6914
HV433	F	20	18.937
HV434	F	21	21.048
HV435	F	21	21.7193
HV436	F	56	24.6094
HV437	M	19	22.8931
HV438	F	22	24.7676
HV439	F	26	22.6757
HV440	F	30	25.0135
HV441	M	25	20.7476
HV442	F	21	22.1297
HV443	M	22	19.8763
HV445	F	28	22.7833
HV446	F	27	25.8645
HV447	F	39	25.2174
HV448	M	25	25.7552
HV449	F	20	20.4783
HV450	F	24	22.4323
HV451	M	63	26.1738
HV452	F	21	20.1092
HV453	F	22	24.3911
HV454	F	18	17.9282
HV455	F	26	19.8839
HV456	F	20	23.5294
HV457	F	22	20.4783
HV458	M	60	26.7036
HV459	M	22	24.5693
HV460	F	28	19.5918
HV461	M	18	21.7982
HV462	M	23	22.0384
HV463	F	20	20.7157
HV464	F	27	25.3515
HV465	F	21	32.4905
HV466	F	20	20.4382
HV467	M	19	19.6676
HV468	F	47	27.9904
HV469	F	26	24.2424
HV470	M	22	24.6097
HV471	M	20	20.9107
HV472	M	25	24.2803
HV473	F	25	20.4491
HV474	M	26	29.9136
HV475	F	21	21.551
HV476	F	23	20.2812
HV477	F	19	17.7154
HV478	F	20	21.0498
HV479	F	26	19.6927
HV480	F	26	22.6347
HV481	F	20	21.3839
HV482	M	22	23.3747
HV483	M	75	32.2118
HV484	M	21	22.5878
HV485	F	22	20.5714
HV486	F	19	18.0662
HV487	M	57	23.1206
HV488	F	21	22.8625
HV490	F	19	20.9712
HV491	F	48	26.7036
HV492	M	22	27.4587
HV493	M	20	21.7859
HV494	F	21	19.487
HV495	F	25	20.9042
HV496	F	20	17.3745
HV498	M	40	24.5351
HV499	F	43	27.9431
HV500	M	19	22.7904
HV501	M	27	27.1731
HV502	F	21	23.8367
HV503	F	25	20.898
HV506	F	22	25.6612
HV507	F	19	22.8571
HV508	F	26	20.9042
HV509	M	63	19.2653
HV510	F	22	21.7079
HV511	M	19	21.0373
HV512	F	24	21.7051
HV513	F	23	21.8724
HV514	F	28	20.7157
HV515	M	18	21.4533
HV516	F	24	21.6721
HV517	F	21	24.4473
HV518	M	18	20.679
HV519	F	21	25.7657
HV520	M	32	24.6986
HV521	M	23	23.255
HV522	M	25	24.3827
HV523	F	20	20.8086
HV524	M	20	21.6216
HV525	F	22	25.6055
HV526	M	29	22.7244
HV527	F	50	24.539
HV528	F	20	20.4284
HV529	F	19	21.7993
HV530	F	23	20.8086
HV531	F	23	20.9366
HV532	M	23	23.2687
HV533	F	24	20.0474
HV534	M	22	24.4418

## Sheet: SuppTable1C
Supplementary Table 1C
Factor name	Physiological system	300-OB cohort	Normal-BMI cohort
Ankle brachial index (ABI)	Hemodynamic	1	0
Erythrocytes	Hemodynamic	1	0
Heart rate	Hemodynamic	1	0
Hematocriet	Hemodynamic	1	0
Hemoglobin	Hemodynamic	1	0
Hypertension	Hemodynamic	1	0
mean cell volume (MCV), is a measure of the average volume of a red blood corpuscle	Hemodynamic	1	0
Mean corpuscular Hb concentration	Hemodynamic	1	0
Peripheral augmentation index	Hemodynamic	1	0
Pulse wave velocity (PWV), direct	Hemodynamic	1	0
Pulse wave velocity (PWV), indirect	Hemodynamic	1	0
red cell distribution width (RDW)	Hemodynamic	1	0
STDEV of PWV, direct	Hemodynamic	1	0
STDEV of PWV, indirect	Hemodynamic	1	0
Thrombocytes	Hemodynamic	1	0
3-hydroxybutyrate	Metabolism	1	1
Acetate	Metabolism	1	1
Acetoacetate	Metabolism	1	1
Alanine	Metabolism	1	1
Albumin	Metabolism	1	1
Amount and abdominal adipose tissue (AAT)	Metabolism	1	1
ApoA1	Metabolism	1	1
ApoB	Metabolism	1	1
ApoB/ApoA1 ratio	Metabolism	1	1
Cholesterol	Metabolism	1	1
Citrate	Metabolism	1	1
Deep SAT	Metabolism	1	0
DHA/FA ratio	Metabolism	1	1
Docosahexaenoic acid (DHA)	Metabolism	1	0
Esterized cholesterol	Metabolism	1	1
Estimated degree of unsaturation	Metabolism	1	1
FAw3/FA ratio	Metabolism	1	1
FAw6/FA ratio	Metabolism	1	1
Free cholesterol	Metabolism	1	1
Glucose	Metabolism	1	1
Glycoprotein acetyls (Gp)	Metabolism	1	1
HbA1c	Metabolism	1	0
HDL cholesterol	Metabolism	1	1
HDL diameter	Metabolism	1	1
HDL triglycerids	Metabolism	1	1
HDL2 cholesterol	Metabolism	1	1
HDL3 cholesterol	Metabolism	1	1
Hip circumference	Metabolism	1	0
Histidine	Metabolism	1	1
HOME-IR	Metabolism	1	0
Isoleucine	Metabolism	1	1
Kreatinine	Metabolism	1	1
LA/FA ratio	Metabolism	1	1
Lactose	Metabolism	1	1
LDL cholesterol	Metabolism	1	1
LDL diameter	Metabolism	1	1
Leucine	Metabolism	1	1
Linoleic acid (LA)	Metabolism	1	1
Liver fat	Metabolism	1	0
Monounsaturated fatty acids (MUFA)	Metabolism	1	1
MUFA/FA ratio	Metabolism	1	1
Nascent HDL cholesterol	Metabolism	1	0
Omega-3 fatty acids (FAw3)	Metabolism	1	1
Omega-6 fatty acids (FAw6)	Metabolism	1	1
Phenylalanine	Metabolism	1	1
Phosphatidylcholine (and other cholines)	Metabolism	1	1
Polyunsaturated fatty acids (PUFA)	Metabolism	1	1
PUFA/FA ratio	Metabolism	1	1
Remnant cholesterol	Metabolism	1	1
Saturated fatty acids (SFA)	Metabolism	1	1
Serum cholesterol	Metabolism	1	1
Serum Triglycerides	Metabolism	1	1
SFA/FA ratio	Metabolism	1	1
Sphingomyelins	Metabolism	1	1
Subcutaneous adipose tissue	Metabolism	1	0
superficial SAT	Metabolism	1	0
Total cholesterol	Metabolism	1	0
Total fatty acids (FA)	Metabolism	1	1
Total phosphoglycerides	Metabolism	1	1
Triglycerides	Metabolism	1	0
Triglycerides to phosphoglycerides ratio	Metabolism	1	1
Tyrosine	Metabolism	1	1
Valine	Metabolism	1	1
VAT/SAT ratio	Metabolism	1	0
VEGF	Metabolism	1	1
visceral adipose tissue (VAT)	Metabolism	1	0
VLDL cholesterol	Metabolism	1	1
VLDL diameter	Metabolism	1	1
VLDL Triglycerides	Metabolism	1	1
Waist Circumference	Metabolism	1	0
IDL-C	Lipoproteins	1	1
IDL-C_%	Lipoproteins	1	1
IDL-CE	Lipoproteins	1	1
IDL-CE_%	Lipoproteins	1	1
IDL-FC	Lipoproteins	1	1
IDL-FC_%	Lipoproteins	1	1
IDL-L	Lipoproteins	1	1
IDL-P	Lipoproteins	1	1
IDL-PL	Lipoproteins	1	1
IDL-PL_%	Lipoproteins	1	1
IDL-TG	Lipoproteins	1	1
IDL-TG_%	Lipoproteins	1	1
L-HDL-C	Lipoproteins	1	1
L-HDL-C_%	Lipoproteins	1	1
L-HDL-CE	Lipoproteins	1	1
L-HDL-CE_%	Lipoproteins	1	1
L-HDL-FC	Lipoproteins	1	1
L-HDL-FC_%	Lipoproteins	1	1
L-HDL-L	Lipoproteins	1	1
L-HDL-P	Lipoproteins	1	1
L-HDL-PL	Lipoproteins	1	1
L-HDL-PL_%	Lipoproteins	1	1
L-HDL-TG	Lipoproteins	1	1
L-HDL-TG_%	Lipoproteins	1	1
L-LDL-C	Lipoproteins	1	1
L-LDL-C_%	Lipoproteins	1	1
L-LDL-CE	Lipoproteins	1	1
L-LDL-CE_%	Lipoproteins	1	1
L-LDL-FC	Lipoproteins	1	1
L-LDL-FC_%	Lipoproteins	1	1
L-LDL-L	Lipoproteins	1	1
L-LDL-P	Lipoproteins	1	1
L-LDL-PL	Lipoproteins	1	1
L-LDL-PL_%	Lipoproteins	1	1
L-LDL-TG	Lipoproteins	1	1
L-LDL-TG_%	Lipoproteins	1	1
L-VLDL-C	Lipoproteins	1	1
L-VLDL-C_%	Lipoproteins	1	1
L-VLDL-CE	Lipoproteins	1	1
L-VLDL-CE_%	Lipoproteins	1	1
L-VLDL-FC	Lipoproteins	1	1
L-VLDL-FC_%	Lipoproteins	1	1
L-VLDL-L	Lipoproteins	1	1
L-VLDL-P	Lipoproteins	1	1
L-VLDL-PL	Lipoproteins	1	1
L-VLDL-PL_%	Lipoproteins	1	1
L-VLDL-TG	Lipoproteins	1	1
L-VLDL-TG_%	Lipoproteins	1	1
M-HDL-C	Lipoproteins	1	1
M-HDL-C_%	Lipoproteins	1	1
M-HDL-CE	Lipoproteins	1	1
M-HDL-CE_%	Lipoproteins	1	1
M-HDL-FC	Lipoproteins	1	1
M-HDL-FC_%	Lipoproteins	1	1
M-HDL-L	Lipoproteins	1	1
M-HDL-P	Lipoproteins	1	1
M-HDL-PL	Lipoproteins	1	1
M-HDL-PL_%	Lipoproteins	1	1
M-HDL-TG	Lipoproteins	1	1
M-HDL-TG_%	Lipoproteins	1	1
M-LDL-C	Lipoproteins	1	1
M-LDL-C_%	Lipoproteins	1	1
M-LDL-CE	Lipoproteins	1	1
M-LDL-CE_%	Lipoproteins	1	1
M-LDL-FC	Lipoproteins	1	1
M-LDL-FC_%	Lipoproteins	1	1
M-LDL-L	Lipoproteins	1	1
M-LDL-P	Lipoproteins	1	1
M-LDL-PL	Lipoproteins	1	1
M-LDL-PL_%	Lipoproteins	1	1
M-LDL-TG	Lipoproteins	1	1
M-LDL-TG_%	Lipoproteins	1	1
M-VLDL-C	Lipoproteins	1	1
M-VLDL-C_%	Lipoproteins	1	1
M-VLDL-CE	Lipoproteins	1	1
M-VLDL-CE_%	Lipoproteins	1	1
M-VLDL-FC	Lipoproteins	1	1
M-VLDL-FC_%	Lipoproteins	1	1
M-VLDL-L	Lipoproteins	1	1
M-VLDL-P	Lipoproteins	1	1
M-VLDL-PL	Lipoproteins	1	1
M-VLDL-PL_%	Lipoproteins	1	1
M-VLDL-TG	Lipoproteins	1	1
M-VLDL-TG_%	Lipoproteins	1	1
S-HDL-C	Lipoproteins	1	1
S-HDL-C_%	Lipoproteins	1	1
S-HDL-CE	Lipoproteins	1	1
S-HDL-CE_%	Lipoproteins	1	1
S-HDL-FC	Lipoproteins	1	1
S-HDL-FC_%	Lipoproteins	1	1
S-HDL-L	Lipoproteins	1	1
S-HDL-P	Lipoproteins	1	1
S-HDL-PL	Lipoproteins	1	1
S-HDL-PL_%	Lipoproteins	1	1
S-HDL-TG	Lipoproteins	1	1
S-HDL-TG_%	Lipoproteins	1	1
S-LDL-C	Lipoproteins	1	1
S-LDL-C_%	Lipoproteins	1	1
S-LDL-CE	Lipoproteins	1	1
S-LDL-CE_%	Lipoproteins	1	1
S-LDL-FC	Lipoproteins	1	1
S-LDL-FC_%	Lipoproteins	1	1
S-LDL-L	Lipoproteins	1	1
S-LDL-P	Lipoproteins	1	1
S-LDL-PL	Lipoproteins	1	1
S-LDL-PL_%	Lipoproteins	1	1
S-LDL-TG	Lipoproteins	1	1
S-LDL-TG_%	Lipoproteins	1	1
S-VLDL-C	Lipoproteins	1	1
S-VLDL-C_%	Lipoproteins	1	1
S-VLDL-CE	Lipoproteins	1	1
S-VLDL-CE_%	Lipoproteins	1	1
S-VLDL-FC	Lipoproteins	1	1
S-VLDL-FC_%	Lipoproteins	1	1
S-VLDL-L	Lipoproteins	1	1
S-VLDL-P	Lipoproteins	1	1
S-VLDL-PL	Lipoproteins	1	1
S-VLDL-PL_%	Lipoproteins	1	1
S-VLDL-TG	Lipoproteins	1	1
S-VLDL-TG_%	Lipoproteins	1	1
XL-HDL-C	Lipoproteins	1	1
XL-HDL-C_%	Lipoproteins	1	1
XL-HDL-CE	Lipoproteins	1	1
XL-HDL-CE_%	Lipoproteins	1	1
XL-HDL-FC	Lipoproteins	1	1
XL-HDL-FC_%	Lipoproteins	1	1
XL-HDL-L	Lipoproteins	1	1
XL-HDL-P	Lipoproteins	1	1
XL-HDL-PL	Lipoproteins	1	1
XL-HDL-PL_%	Lipoproteins	1	1
XL-HDL-TG	Lipoproteins	1	1
XL-HDL-TG_%	Lipoproteins	1	1
XL-VLDL-C	Lipoproteins	1	1
XL-VLDL-C_%	Lipoproteins	1	1
XL-VLDL-CE	Lipoproteins	1	1
XL-VLDL-CE_%	Lipoproteins	1	1
XL-VLDL-FC	Lipoproteins	1	1
XL-VLDL-FC_%	Lipoproteins	1	1
XL-VLDL-L	Lipoproteins	1	1
XL-VLDL-P	Lipoproteins	1	1
XL-VLDL-PL	Lipoproteins	1	1
XL-VLDL-PL_%	Lipoproteins	1	1
XL-VLDL-TG	Lipoproteins	1	1
XL-VLDL-TG_%	Lipoproteins	1	1
XS-VLDL-C	Lipoproteins	1	1
XS-VLDL-C_%	Lipoproteins	1	1
XS-VLDL-CE	Lipoproteins	1	1
XS-VLDL-CE_%	Lipoproteins	1	1
XS-VLDL-FC	Lipoproteins	1	1
XS-VLDL-FC_%	Lipoproteins	1	1
XS-VLDL-L	Lipoproteins	1	1
XS-VLDL-P	Lipoproteins	1	1
XS-VLDL-PL	Lipoproteins	1	1
XS-VLDL-PL_%	Lipoproteins	1	1
XS-VLDL-TG	Lipoproteins	1	1
XS-VLDL-TG_%	Lipoproteins	1	1
XXL-VLDL-C	Lipoproteins	1	1
XXL-VLDL-C_%	Lipoproteins	1	1
XXL-VLDL-CE	Lipoproteins	1	1
XXL-VLDL-CE_%	Lipoproteins	1	1
XXL-VLDL-FC	Lipoproteins	1	1
XXL-VLDL-FC_%	Lipoproteins	1	1
XXL-VLDL-L	Lipoproteins	1	1
XXL-VLDL-P	Lipoproteins	1	1
XXL-VLDL-PL	Lipoproteins	1	1
XXL-VLDL-PL_%	Lipoproteins	1	1
XXL-VLDL-TG	Lipoproteins	1	1
XXL-VLDL-TG_%	Lipoproteins	1	1
%Basophils	Immune	1	0
%Eosinophils	Immune	1	0
%Lymphocytes	Immune	1	0
%Monocytes	Immune	1	0
%Neutrophils	Immune	1	0
Adiponectin	Immune	1	1
Basophils	Immune	1	0
Eosinophils	Immune	1	0
high sensitivity C-reactive proteins (hsCRP)	Immune	1	1
IL18	Immune	1	1
IL18pba	Immune	1	1
IL1B	Immune	1	1
IL6	Immune	1	1
Leptin	Immune	1	1
Leukocytes	Immune	1	0
Lymphocytes	Immune	1	0
Monocytes	Immune	1	0
Neutrophils	Immune	1	0
Resistin	Immune	1	1
IL-1B response to C. Albicans	Immune (immune capacity_	1	0
IL-1B response to LPS	Immune (immune capacity_	1	0
IL-1B response to P. Gingivalis	Immune (immune capacity_	1	0
IL-1B response to PHA	Immune (immune capacity_	1	0
IL-1B response to S. Aureus	Immune (immune capacity_	1	0
IL-1RA response to C. Albicans	Immune (immune capacity_	1	0
IL-1RA response to LPS	Immune (immune capacity_	1	0
IL-1RA response to P. Gingivalis	Immune (immune capacity_	1	0
IL-1RA response to PHA	Immune (immune capacity_	1	0
IL-1RA response to S. Aureus	Immune (immune capacity_	1	0
IL-6 response to P. Gingivalis	Immune (immune capacity_	1	0
IL-6 response to S. Aureus	Immune (immune capacity_	1	0
IL-6 response to C. Albicans	Immune (immune capacity_	1	0
IL-6 response to LPS	Immune (immune capacity_	1	0
IL-6 response to PHA	Immune (immune capacity_	1	0
TNFa response to S. Aureus	Immune (immune capacity_	1	0
TNFa response to C. Albicans	Immune (immune capacity_	1	0
TNFa response to LPS	Immune (immune capacity_	1	0
TNFa response to P. Gingivalis	Immune (immune capacity_	1	0
TNFa response to PHA	Immune (immune capacity_	1	0
IFNg response to A. Fumigatus (7 days)	Immune (immune capacity_	0	1
IFNg response to B. Burgdorferi (7 days)	Immune (immune capacity_	0	1
IFNg response to Bacteroides (7 days)	Immune (immune capacity_	0	1
IFNg response to Borrelia (7 days)	Immune (immune capacity_	0	1
IFNg response to C. Albicans (7 days)	Immune (immune capacity_	0	1
IFNg response to C. Albicans (hyphae; 7 days)	Immune (immune capacity_	0	1
IFNg response to Cryptococcus (7 days)	Immune (immune capacity_	0	1
IFNg response to MTB (7 days)	Immune (immune capacity_	0	1
IFNg response to S. Aureus (7 days)	Immune (immune capacity_	0	1
IL-17 response to A. Fumigatus (7 days)	Immune (immune capacity_	0	1
IL-17 response to B. Burgdorferi (7 days)	Immune (immune capacity_	0	1
IL-17 response to Bacteroides (7 days)	Immune (immune capacity_	0	1
IL-17 response to Borrelia (7 days)	Immune (immune capacity_	0	1
IL-17 response to C. Albicans (7 days)	Immune (immune capacity_	0	1
IL-17 response to C. Albicans (hyphae; 7 days)	Immune (immune capacity_	0	1
IL-17 response to Cryptococcus (7 days)	Immune (immune capacity_	0	1
IL-17 response to MTB (7 days)	Immune (immune capacity_	0	1
IL-17 response to S. Aureus (7 days)	Immune (immune capacity_	0	1
IL-22 response to A. Fumigatus (7 days)	Immune (immune capacity_	0	1
IL-22 response to B. Burgdorferi (7 days)	Immune (immune capacity_	0	1
IL-22 response to Bacteroides (7 days)	Immune (immune capacity_	0	1
IL-22 response to Borrelia (7 days)	Immune (immune capacity_	0	1
IL-22 response to C. Albicans (7 days)	Immune (immune capacity_	0	1
IL-22 response to C. Albicans (hyphae; 7 days)	Immune (immune capacity_	0	1
IL-22 response to Cryptococcus (7 days)	Immune (immune capacity_	0	1
IL-22 response to MTB (7 days)	Immune (immune capacity_	0	1
IL-22 response to S. Aureus (7 days)	Immune (immune capacity_	0	1

## Sheet: SuppTable1D
Supplementary Table 1D
Parameter group	Parameter type	Number of parameters	Cohort
LP parameters	Triglycerid (TG) content	14 (all lipoprotein subfractions)	300-OB (including the obesity cohort) and normal-BMI cohorts
	Cholesterol (C) content	14 (all Lipoprotein subfractions)
	Esterified cholesterol (EC) content	14 (all Lipoprotein subfractions)
	Free cholesterol (FC) content	14 (all Lipoprotein subfractions)
	Phospholipid (PL) content	14 (all Lipoprotein subfractions)
	Triglycerid (TG) percentage	14 (all Lipoprotein subfractions)
	Cholesterol (C) percentage	14 (all Lipoprotein subfractions)
	Esterified cholesterol (EC) percentage	14 (all Lipoprotein subfractions)
	Free cholesterol (FC) percentage	14 (all Lipoprotein subfractions)
	Phospholipid (PL) percentage	14 (all Lipoprotein subfractions)
	Particle concentration	14 (all Lipoprotein subfractions)
	Total-lipid content	14 (all Lipoprotein subfractions)
Immune capacity	IL1b, 24 h	5 (C. albicans conidia, LPS, PHA, S. aureus and P. Gengivalis)	300-OB cohort (including the obesity cohort)
	IL1RA, 24 h	5 (C. albicans conidia, LPS, PHA, S. aureus and P. Gengivalis)
	IL6, 24h	5 (C. albicans conidia, LPS, PHA, S. aureus and P. Gengivalis)
	TNF, 24 h	5 (C. albicans conidia, LPS, PHA, S. aureus and P. Gengivalis)
	IFNa, 7 days	9 (A fumigatus conidia , B burgdorferi , Bacteroides, Borrelia, C. albicans conidia, C. albicans hyphae, Cryptococcus, MTB, S. aureus)	Normal-BMI cohort
	IL-17, 7 days	9 (A fumigatus conidia , B burgdorferi , Bacteroides, Borrelia, C. albicans conidia, C. albicans hyphae, Cryptococcus, MTB, S. aureus)
	IL-22, 7 days	9 (A fumigatus conidia , B burgdorferi , Bacteroides, Borrelia, C. albicans conidia, C. albicans hyphae, Cryptococcus, MTB, S. aureus)
