# Supplementary material for: An integrative model of cardiometabolic traits identifies two types of metabolic syndrome
Source: eLife journal article supplement (doi:10.7554/elife.61710), 2021-01-28
Supplement: supp [file elife-61710-supp-v1.zip › elife_poa_e61710_Supplementary_file_2.xlsx]

## Sheet: SuppTable2A
Supplementary Table 2A
Factor name	IM1 coordinate; obesity cohort	IM2 coordinate; obesity cohort	IM1 coordinate; Normal-BMI cohort	IM2 coordinate; Normal-BMI cohort	Pearson’s correlations (r) with the IM1 state; obesity cohort	Pearson’s correlations (r) with the IM2 state; obesity cohort	Pearson’s correlations (r) with the IM1 state; Normal-BMI cohort	Pearson’s correlations (r) with the IM2 state; Normal-BMI cohort
Ankle brachial index (ABI)	9.01978	4.49333			-0.0561312	-0.0884089
Erythrocytes	9.97809	-0.37906			0.224515	-0.0933302
Heart rate	13.7925	2.0922			0.254971	-0.00262905
Hematocriet	12.6842	2.73397			0.286125	-0.0902092
Hemoglobin	13.8451	-0.955987			0.318774	-0.19526
Hypertension	10.3977	4.69299			0.291248	-0.0735924
mean cell volume (MCV), is a measure of the average volume of a red blood corpuscle	4.61328	3.4888			0.0492127	0.0115777
Mean corpuscular Hb concentration	5.20792	-13.0526			0.171989	-0.287484
Peripheral augmentation index	0.18698	-1.40678			-0.143236	0.162378
Pulse wave velocity (PWV), direct	10.8146	3.79883			0.0849785	-0.0296136
Pulse wave velocity (PWV), indirect	9.38409	7.1065			0.0911732	-0.0070635
red cell distribution width (RDW)	-8.24794	-1.42535			-0.178379	0.0173042
STDEV of PWV, direct	11.8826	3.41192			0.180958	0.0586046
STDEV of PWV, indirect	11.8287	1.84805			0.206811	0.0334033
Thrombocytes	-0.693172	10.58			-0.0938249	0.317959
3-hydroxybutyrate	-6.11716	-5.22165	7.61743	7.58946	-0.1481	-0.0909562	0.155801	0.238927
Acetate	1.97346	9.03103	-6.36435	0.131295	-0.110143	0.302918	-0.0543776	-0.0178049
Acetoacetate	-7.47963	-1.53187	6.76211	0.793684	-0.246124	-0.0880148	-0.0014242	0.0273283
Alanine	10.9059	7.05232	-4.64436	-0.735919	0.353724	0.364193	-0.0517776	0.0558811
Albumin	6.41424	10.4112	-5.03472	5.62279	0.0315646	0.46382	-0.0661927	0.031481
Amount and abdominal adipose tissue (AAT)	1.06494	8.33907	2.95804	9.06779	-0.0808401	0.14722	0.0205329	0.0808092
ApoA1	-2.78367	7.99237	-1.04223	5.41361	-0.275692	0.485748	-0.11421	0.292059
ApoB	6.57354	10.2899	2.08048	9.97387	0.302443	0.875083	0.108263	0.588117
ApoB/ApoA1 ratio	8.89959	8.56688	1.03514	9.34677	0.496964	0.696171	0.0660192	0.4826
Cholesterol	0.43168	11.0235	0.915973	10.171	-0.0759953	0.781855	-0.0358733	0.45225
Citrate	-6.26819	-0.416278	-6.10453	1.25809	-0.176673	0.02317	-0.0989608	-0.00384253
Deep SAT	3.63665	-8.44561			0.176922	-0.0658731
DHA/FA ratio	-1.75934	1.65455	5.3678	8.78905	-0.0609048	0.128185	0.125642	-0.176208
Docosahexaenoic acid (DHA)	5.80491	8.58328			0.194975	0.481374
Esterized cholesterol	-0.0801906	10.9829	-2.91871	9.93229	-0.179505	0.885728	-0.288731	0.864208
Estimated degree of unsaturation	-9.94934	-0.952535	-7.00028	-1.5558	-0.634778	0.0428892	-0.159681	-0.0074445
FAw3/FA ratio	-4.25962	-1.36073	-6.07081	-9.84777	-0.101421	0.00579524	-0.229111	-0.0771805
FAw6/FA ratio	-10.1671	-2.22657	-8.54333	-0.570449	-0.761161	-0.065868	-0.230988	-0.00748288
Free cholesterol	1.49445	11.5612	-1.75417	10.4788	-0.127314	0.907926	-0.192023	0.881359
Glucose	10.6925	4.51749	-2.68005	-1.08814	0.294821	0.0996496	-0.0349014	0.0348433
Glycoprotein acetyls (Gp)	11.3466	6.80704	10.0723	7.51757	0.502461	0.445631	0.424794	0.387512
HbA1c	7.75427	6.33939			0.195878	0.110006
HDL cholesterol	-8.4917	-0.5218	-2.04881	0.238378	-0.634779	0.116751	-0.272096	0.1498
HDL diameter	-8.7799	-5.71035	-6.08737	-4.4459	-0.646945	-0.125059	-0.371695	-0.137749
HDL triglycerids	11.3219	7.37234	11.0746	7.14381	0.595299	0.606295	0.586587	0.557203
HDL2 cholesterol	-8.30621	-3.07187	-1.37869	-2.33579	-0.62113	-0.00268723	-0.238692	0.0223833
HDL3 cholesterol	-5.50733	7.86818	-4.1846	7.77192	-0.527002	0.520149	-0.324757	0.440134
Hip circumference	-7.467	-3.42536			0.160067	-0.0200641
Histidine	-0.349766	-6.82446	-1.34256	-2.68623	0.0510465	-0.136839	0.00463074	-0.141381
HOME-IR	5.78517	-0.661491			0.130934	0.065704
Isoleucine	12.1444	6.04845	7.66937	-1.54769	0.6053	0.226352	0.172487	-0.0347345
Kreatinine	11.9964	3.88764	10.0031	6.56731	0.116943	-0.110951	0.194819	0.0320039
LA/FA ratio	-9.46336	-1.43568	-10.4218	-2.39187	-0.564554	-0.0568757	-0.48807	-0.0863096
Lactose	12.4486	5.1376	-5.56248	4.03885	0.222144	0.164104	-0.0547012	0.0446399
LDL cholesterol	0.241048	11.1392	-3.45776	9.75594	-0.203873	0.923692	-0.344894	0.887587
LDL diameter	-3.79187	-9.10449	2.98449	-8.59394	-0.286476	-0.344657	0.0751773	-0.49199
Leucine	12.3244	4.51327	-1.49164	-0.888992	0.395496	-0.015023	0.0340875	-0.109317
Linoleic acid (LA)	5.16346	10.5683	0.953545	10.2948	0.167393	0.816525	-0.0195044	0.774103
Liver fat	14.7098	1.20616			0.410941	-0.00239756
Monounsaturated fatty acids (MUFA)	11.6422	6.96353	10.2523	7.76001	0.624399	0.636259	0.414409	0.529714
MUFA/FA ratio	15.1135	0.57245	13.5142	3.00334	0.793907	0.238508	0.437168	0.132566
Nascent HDL cholesterol	3.47616	10.9843			0.0979867	0.807389
Omega-3 fatty acids (FAw3)	5.88613	8.65708	4.83648	6.63664	0.21888	0.49347	0.0726754	0.322658
Omega-6 fatty acids (FAw6)	4.75588	10.7734	0.758917	10.1585	0.151805	0.845428	0.0509858	0.611574
Phenylalanine	9.91332	8.41151	3.9843	0.412984	0.195839	0.322541	0.0313658	0.0911333
Phosphatidylcholine (and other cholines)	4.56897	9.76604	1.53218	10.2582	0.106053	0.671095	-0.0037377	0.713333
Polyunsaturated fatty acids (PUFA)	4.88404	10.6097	-0.00582352	10.4958	0.166833	0.824491	-0.0469776	0.621701
PUFA/FA ratio	-10.0384	-1.66071	-10.4061	-2.69144	-0.747303	-0.0376379	-0.555321	-0.0989147
Remnant cholesterol	5.30612	10.5532	0.438705	10.1232	0.22799	0.878207	0.0161574	0.848592
Saturated fatty acids (SFA)	9.04694	9.01559	6.4376	9.55528	0.424536	0.745296	0.235632	0.655895
Serum cholesterol	0.415819	11.2432	-2.66858	10.066	-0.167289	0.908926	-0.269612	0.892196
Serum Triglycerides	12.996	5.3764	11.7323	5.52225	0.803649	0.53024	0.681003	0.510673
SFA/FA ratio	1.6875	-5.60719	7.67115	-4.01989	-0.0956722	-0.295881	-0.000791037	-0.00829821
Sphingomyelins	-0.978406	11.3944	-2.14331	9.87224	-0.272413	0.770021	-0.121248	0.514491
Subcutaneous adipose tissue	-3.15273	-9.82741			0.0580947	0.0197424
superficial SAT	-6.42246	-7.35992			-0.114293	0.122324
Total cholesterol	2.82674	10.3156			0.00900576	0.718421
Total fatty acids (FA)	8.95317	9.06079	6.1432	9.96233	0.432698	0.763564	0.221825	0.57246
Total phosphoglycerides	5.406	8.12196	4.53433	9.81007	0.123551	0.536913	0.11049	0.644964
Triglycerides	13.9197	3.83235			0.815963	0.419743
Triglycerides to phosphoglycerides ratio	13.8222	3.40693	12.899	1.6648	0.823734	0.348738	0.607759	0.228257
Tyrosine	8.26799	7.38626	-2.97598	-3.55017	0.243839	0.259032	-0.0432666	-0.0214026
Valine	10.6107	5.90706	-9.08269	-0.0387473	0.260103	-0.0542094	-0.112935	-0.0556653
VAT/SAT ratio	11.1147	-0.560138			0.276918	-0.128042
VEGF	13.0098	-1.85316	11.4655	6.1846	0.166289	0.0050744	0.183233	0.221291
visceral adipose tissue (VAT)	10.0986	-6.03497			0.375199	-0.116755
VLDL cholesterol	9.01831	8.84597	4.34558	9.41249	0.495048	0.746925	0.276278	0.726922
VLDL diameter	14.8612	0.0837237	13.4136	-1.94559	0.903797	0.0980795	0.753249	0.047167
VLDL Triglycerides	13.5485	4.27802	12.0855	3.42316	0.839523	0.431337	0.684452	0.355601
Waist Circumference	12.4197	-3.23133			0.413489	-0.204242
IDL-C	-9.04259	-0.514548	-8.81732	-2.07937	-0.674412	0.101874	-0.638833	-0.0407602
IDL-C_%	-8.64712	-0.38068	-7.51941	-2.20716	-0.589979	0.111096	-0.524896	-0.0397511
IDL-CE	-6.61552	-1.72896	-3.63323	-3.89144	-0.376526	0.0298661	-0.245199	-0.10909
IDL-CE_%	-4.3317	-2.15432	-0.478742	-4.19085	-0.213081	0.013948	-0.0954355	-0.10733
IDL-FC	-10.1208	0.965505	-10.7932	-0.18634	-0.897872	0.189787	-0.866618	0.0781176
IDL-FC_%	-9.64406	1.44078	-10.6749	0.367376	-0.809829	0.192124	-0.846001	0.11685
IDL-L	-10.1805	-0.460013	-10.5229	-1.5304	-0.85011	0.116512	-0.849222	-0.00859969
IDL-P	0.849756	11.2226	-2.58341	10.2172	-0.154268	0.932557	-0.265545	0.921055
IDL-PL	-8.88563	-3.4864	-7.3629	-3.24906	-0.729266	-0.24127	-0.533993	-0.105018
IDL-PL_%	-7.65078	-3.3217	-3.19759	-3.24342	-0.581016	-0.240172	-0.311913	-0.10539
IDL-TG	14.5516	-0.956114	13.5779	0.838353	0.779382	0.0106981	0.746229	0.0918143
IDL-TG_%	14.5838	-1.02449	13.6176	0.644949	0.787922	0.00333316	0.755555	0.0744214
L-HDL-C	-6.53236	-9.39315	-6.28348	-10.2432	-0.651862	-0.564131	-0.460762	-0.539427
L-HDL-C_%	-6.36078	-9.5445	-6.66139	-9.89081	-0.635651	-0.571827	-0.443687	-0.523219
L-HDL-CE	-5.10218	-10.5045	-4.62272	-11.3973	-0.555314	-0.637607	-0.340996	-0.601934
L-HDL-CE_%	-4.27545	-10.97	-4.50408	-11.3198	-0.49579	-0.647003	-0.291288	-0.580752
L-HDL-FC	-8.67007	-6.58585	-8.79535	-6.70109	-0.772027	-0.341994	-0.620203	-0.268757
L-HDL-FC_%	-8.74386	-6.45974	-9.13724	-6.10104	-0.77173	-0.326794	-0.62946	-0.240299
L-HDL-L	-7.58616	-8.15899	-6.76345	-9.3467	-0.720174	-0.492518	-0.53206	-0.438858
L-HDL-P	-7.87296	-3.84209	-1.6896	-3.55687	-0.561545	-0.0836855	-0.208211	-0.0378921
L-HDL-PL	8.47459	8.35449	9.24726	4.87967	0.409617	0.473143	0.216122	0.336798
L-HDL-PL_%	10.0326	7.72267	10.62	5.68711	0.516195	0.500546	0.292901	0.374989
L-HDL-TG	11.6072	6.41193	7.18395	8.05302	0.609389	0.570237	0.333021	0.409219
L-HDL-TG_%	11.6366	6.39105	7.48979	8.08878	0.61433	0.56964	0.349055	0.404251
L-LDL-C	-7.87241	5.01327	-8.79724	3.51569	-0.652485	0.491915	-0.733655	0.384107
L-LDL-C_%	-6.53116	6.71106	-7.89916	5.04241	-0.560495	0.605792	-0.665352	0.512422
L-LDL-CE	-3.13053	9.17594	-5.58027	7.16046	-0.297185	0.750539	-0.471423	0.669389
L-LDL-CE_%	-0.903737	9.86539	-4.25369	8.1757	-0.107734	0.771507	-0.376927	0.740713
L-LDL-FC	-8.61502	-7.36331	-5.97965	-10.2243	-0.813068	-0.479037	-0.538166	-0.702227
L-LDL-FC_%	-8.7231	-6.99746	-5.08239	-10.6319	-0.678846	-0.227908	-0.479857	-0.732059
L-LDL-L	-9.75929	-2.07216	-9.78801	-4.27036	-0.804351	-0.0321169	-0.769102	-0.247229
L-LDL-P	1.16586	11.3205	-2.44371	10.2595	-0.149876	0.938399	-0.269471	0.923428
L-LDL-PL	-0.0494245	-13.2544	5.41523	-12.6862	-0.0403241	-0.888817	0.17867	-0.900522
L-LDL-PL_%	2.97806	-13.3535	6.98239	-12.1388	0.183857	-0.796694	0.296843	-0.876893
L-LDL-TG	14.0262	-3.01951	12.8155	0.211299	0.669466	-0.10124	0.655354	0.0622351
L-LDL-TG_%	14.068	-2.88873	12.8103	0.265786	0.682412	-0.0966939	0.661853	0.0620689
L-VLDL-C	-8.02941	5.9518	-5.5034	8.35456	-0.658307	0.479048	-0.359526	0.627129
L-VLDL-C_%	-8.28425	5.59491	-6.18874	7.85656	-0.681218	0.455068	-0.392487	0.493213
L-VLDL-CE	-9.59656	2.78554	-8.9941	4.24145	-0.812793	0.24489	-0.585181	0.238091
L-VLDL-CE_%	-9.69679	2.34124	-9.58851	2.03943	-0.818825	0.207675	-0.549713	0.089881
L-VLDL-FC	6.10628	8.02101	5.01679	9.53272	0.32794	0.513822	0.182169	0.672146
L-VLDL-FC_%	7.45743	7.25764	-4.38685	-7.43975	0.384663	0.478837	-0.223934	-0.273604
L-VLDL-L	-4.3311	9.0983	-0.292218	10.464	-0.360403	0.631927	-0.0739614	0.761966
L-VLDL-P	13.7275	3.6771	12.3659	2.76269	0.844625	0.339261	0.63562	0.299074
L-VLDL-PL	3.13451	10.5946	8.7275	9.0076	0.0571839	0.668825	0.347506	0.621598
L-VLDL-PL_%	5.49571	9.7921	9.02886	8.51212	0.182073	0.500772	0.137965	0.269131
L-VLDL-TG	11.984	-10.0053	5.38731	-12.6629	0.611483	-0.571292	0.137202	-0.762626
L-VLDL-TG_%	11.5466	-10.3974	4.90435	-12.6613	0.567258	-0.596521	0.0529957	-0.683447
M-HDL-C	-6.80788	-8.45029	-8.09142	-8.19709	-0.64902	-0.523071	-0.653435	-0.471373
M-HDL-C_%	-6.65563	-8.66951	-7.604	-8.63739	-0.635895	-0.540709	-0.594751	-0.488873
M-HDL-CE	-5.84218	-9.9048	-5.46334	-10.9314	-0.582882	-0.652352	-0.493472	-0.637671
M-HDL-CE_%	-5.51038	-10.2583	-4.46997	-11.4821	-0.555753	-0.677679	-0.414283	-0.648076
M-HDL-FC	-8.2623	0.822732	-7.94683	4.96204	-0.621442	0.13289	-0.532073	0.343384
M-HDL-FC_%	-7.93337	2.1825	-7.1939	5.601	-0.588052	0.203484	-0.480958	0.377983
M-HDL-L	-7.71207	-6.90097	-9.51687	-4.79232	-0.707125	-0.396613	-0.721327	-0.244108
M-HDL-P	-1.77447	2.36595	7.74439	1.08305	-0.193374	0.180605	0.213797	0.232233
M-HDL-PL	6.47896	4.7783	5.72523	4.62185	0.18448	0.271786	0.110599	0.206911
M-HDL-PL_%	10.5174	4.88821	9.5897	4.77873	0.385734	0.334676	0.276003	0.258672
M-HDL-TG	11.8222	6.45137	11.2777	7.11467	0.698948	0.602796	0.638776	0.535168
M-HDL-TG_%	11.8601	6.38551	11.3663	6.99572	0.701638	0.596942	0.645123	0.532978
M-LDL-C	-7.30765	5.61015	-8.97774	3.90278	-0.622053	0.506041	-0.755903	0.37178
M-LDL-C_%	-5.92105	7.58782	-8.07902	5.68289	-0.549011	0.653531	-0.670614	0.53791
M-LDL-CE	-3.29718	9.60095	-6.1176	7.90015	-0.396962	0.805956	-0.538625	0.741184
M-LDL-CE_%	-3.14466	9.43655	-5.58651	8.40224	-0.395447	0.734679	-0.458667	0.750478
M-LDL-FC	-0.26299	-13.4275	4.18466	-13.0082	-0.124293	-0.937839	0.095705	-0.943195
M-LDL-FC_%	0.644194	-13.531	4.83727	-12.8406	-0.0522931	-0.902491	0.115747	-0.905625
M-LDL-L	-6.53608	-9.11156	-2.73978	-11.9105	-0.542596	-0.517884	-0.32079	-0.773245
M-LDL-P	1.97462	11.361	-2.06521	10.3135	-0.0718195	0.926255	-0.226393	0.92369
M-LDL-PL	6.65227	-12.8841	8.39415	-11.6498	0.318994	-0.84763	0.410543	-0.861464
M-LDL-PL_%	8.44967	-11.7476	9.26689	-11.1085	0.432842	-0.627759	0.456599	-0.811604
M-LDL-TG	13.0756	-2.20157	11.2276	3.23168	0.532072	0.0194446	0.503485	0.303925
M-LDL-TG_%	13.1316	-1.84741	10.768	3.1046	0.536951	0.0418199	0.369359	0.255416
M-VLDL-C	-8.53154	6.02392	-5.83687	8.5205	-0.710544	0.533282	-0.48935	0.711535
M-VLDL-C_%	-8.65257	5.83576	-6.13594	8.23229	-0.721241	0.521655	-0.497036	0.693988
M-VLDL-CE	-9.40365	4.44895	-7.52604	6.81681	-0.803992	0.414806	-0.636753	0.559468
M-VLDL-CE_%	-9.52159	4.19083	-7.84843	6.36149	-0.816838	0.394322	-0.650183	0.536032
M-VLDL-FC	8.06423	9.56791	4.52861	10.7129	0.316437	0.716252	0.239773	0.778424
M-VLDL-FC_%	10.6211	7.80033	6.37051	10.0786	0.474694	0.629265	0.315392	0.720467
M-VLDL-L	-6.99808	7.78309	-3.60815	9.90397	-0.603822	0.619006	-0.315609	0.795901
M-VLDL-P	13.1195	4.91644	11.5843	3.8709	0.805707	0.469481	0.63801	0.37979
M-VLDL-PL	-6.87336	6.44617	0.508394	10.4047	-0.564535	0.481192	-0.0676766	0.621138
M-VLDL-PL_%	-6.79107	4.33901	1.95116	9.80404	-0.474828	0.288106	-0.00440958	0.501547
M-VLDL-TG	13.678	-7.98603	9.65067	-10.7195	0.73738	-0.495826	0.482398	-0.707605
M-VLDL-TG_%	13.5455	-8.11539	9.42487	-10.8811	0.702149	-0.458771	0.448382	-0.728086
S-HDL-C	-2.4112	10.5865	-6.90547	7.42252	-0.455992	0.725834	-0.595873	0.594011
S-HDL-C_%	-1.98855	10.7391	-6.50768	7.73983	-0.428206	0.745201	-0.568913	0.602228
S-HDL-CE	-1.93304	10.7706	-6.28149	7.92879	-0.414165	0.758467	-0.548238	0.614083
S-HDL-CE_%	-1.62788	10.8659	-5.95408	8.15825	-0.39389	0.76983	-0.526723	0.6195
S-HDL-FC	2.64541	-13.863	-0.228634	-11.9553	-0.0544653	-0.784131	-0.0677029	-0.487455
S-HDL-FC_%	3.53443	-13.8646	1.97503	-12.1694	0.0356071	-0.799149	0.0206766	-0.500944
S-HDL-L	-9.46794	2.60018	-10.3839	0.634819	-0.757296	0.172242	-0.767877	0.126441
S-HDL-P	6.22684	7.44225	10.7105	4.38546	0.0456231	0.418639	0.374866	0.402775
S-HDL-PL	3.00441	-13.8697	7.71295	-11.6454	0.167411	-0.854385	0.367954	-0.724207
S-HDL-PL_%	3.61859	-13.8563	8.27972	-11.3902	0.214216	-0.841937	0.407574	-0.701815
S-HDL-TG	13.7949	3.14565	11.6538	5.55269	0.837932	0.313984	0.677034	0.398705
S-HDL-TG_%	13.8565	3.00211	11.7562	5.27197	0.841469	0.304598	0.681496	0.381114
S-LDL-C	-8.34041	5.18048	-9.0101	4.6992	-0.730294	0.49233	-0.796265	0.465288
S-LDL-C_%	-7.02201	7.0617	-8.03595	6.20118	-0.643586	0.634093	-0.693832	0.591881
S-LDL-CE	-4.81364	9.01377	-6.39574	7.94553	-0.502205	0.777142	-0.579848	0.751284
S-LDL-CE_%	-3.74712	9.65512	-6.24892	8.13009	-0.436723	0.820277	-0.441172	0.696278
S-LDL-FC	-0.472494	-13.2265	3.28607	-13.0134	-0.171057	-0.886514	0.0490804	-0.915709
S-LDL-FC_%	0.694109	-13.399	4.28238	-12.8638	-0.0763819	-0.872762	0.0963901	-0.890488
S-LDL-L	-8.45916	-7.01518	-6.37726	-9.85947	-0.69127	-0.44155	-0.503232	-0.679089
S-LDL-P	1.92917	11.2261	-1.92498	10.1959	-0.0855132	0.930626	-0.209307	0.901797
S-LDL-PL	5.58873	-13.3163	7.95189	-11.826	0.250185	-0.895845	0.375768	-0.875517
S-LDL-PL_%	6.86201	-12.9101	8.81363	-11.3393	0.330111	-0.863681	0.420052	-0.828661
S-LDL-TG	14.7427	-0.0561994	13.8823	2.68487	0.827166	0.154407	0.779457	0.358454
S-LDL-TG_%	14.7147	0.134936	13.1059	4.23518	0.824127	0.16854	0.53762	0.321507
S-VLDL-C	-10.2891	0.0402381	-9.88644	3.22306	-0.897291	0.201447	-0.861714	0.336807
S-VLDL-C_%	-10.2461	0.159256	-9.85907	3.16314	-0.886157	0.218056	-0.856666	0.336578
S-VLDL-CE	-10.1719	-0.105563	-9.96675	2.63867	-0.854755	0.204787	-0.854572	0.287872
S-VLDL-CE_%	-10.1127	-0.0930035	-9.92351	2.5767	-0.837605	0.209904	-0.847736	0.283821
S-VLDL-FC	-9.73895	1.17818	-7.53018	5.83465	-0.801651	0.150535	-0.598443	0.449317
S-VLDL-FC_%	-8.59399	2.07451	-6.14065	6.32289	-0.674698	0.137965	-0.469305	0.451085
S-VLDL-L	-10.4076	-0.161361	-9.74339	3.44339	-0.930221	0.146704	-0.842194	0.338567
S-VLDL-P	11.2717	7.46538	8.57384	8.01285	0.663941	0.674859	0.491109	0.638148
S-VLDL-PL	-7.82657	-4.52354	-2.28968	-2.94667	-0.68216	-0.221306	-0.278571	-0.123613
S-VLDL-PL_%	-5.28834	-5.95795	2.88139	-5.2474	-0.539644	-0.284084	-0.0440761	-0.237211
S-VLDL-TG	15.2404	-1.44228	14.0369	-4.46524	0.941376	-0.074008	0.852377	-0.24825
S-VLDL-TG_%	15.2442	-1.54785	13.9804	-4.5652	0.941673	-0.0818496	0.84793	-0.261742
XL-HDL-C	8.27223	-8.26867	3.13983	-0.439066	0.325265	-0.264912	0.0974708	0.00223094
XL-HDL-C_%	9.14419	-7.91348	3.46027	-0.387631	0.366227	-0.252773	0.116078	0.00217653
XL-HDL-CE	8.56957	-9.01952	3.41626	-0.460195	0.339758	-0.286411	0.114206	-0.0127656
XL-HDL-CE_%	9.33698	-8.69121	3.85445	-0.355799	0.374891	-0.277685	0.133019	-0.010031
XL-HDL-FC	-0.397373	8.64738	-0.0742166	-0.558314	-0.145095	0.259424	-0.098483	0.0897836
XL-HDL-FC_%	-1.86488	7.24874	-1.17435	-0.0498687	-0.1292	0.205676	-0.108343	0.106741
XL-HDL-L	-3.93285	-8.64245	-1.59029	-2.94088	-0.252169	-0.294574	-0.14616	-0.0686064
XL-HDL-P	-9.18632	-3.9977	-6.90533	-2.97572	-0.590398	0.00241768	-0.349135	0.016934
XL-HDL-PL	-8.04164	0.973466	-1.33558	-3.38594	-0.585034	0.109617	-0.217801	-0.0834745
XL-HDL-PL_%	-7.84215	1.22977	-1.13247	-3.05482	-0.568769	0.121225	-0.208154	-0.0677934
XL-HDL-TG	13.4608	4.21711	10.5905	5.30033	0.78355	0.388808	0.552285	0.365518
XL-HDL-TG_%	13.4501	4.28004	10.6204	5.24392	0.785534	0.391663	0.54999	0.352265
XL-VLDL-C	-10.0704	0.449129	-10.1063	1.30152	-0.810284	0.198175	-0.678575	0.190494
XL-VLDL-C_%	-10.0622	0.249859	-10.1591	1.04094	-0.808081	0.181752	-0.517701	0.0617264
XL-VLDL-CE	-9.73814	-0.109868	-10.1497	-0.565455	-0.748067	0.135915	-0.632991	0.0401984
XL-VLDL-CE_%	-9.601	-0.155623	-10.1802	0.196968	-0.726379	0.127086	-0.477335	-0.00995053
XL-VLDL-FC	-9.50356	1.0862	-8.31564	4.8789	-0.678224	0.229232	-0.514103	0.438621
XL-VLDL-FC_%	-9.45888	0.971284	11.6963	-7.91003	-0.667054	0.221387	0.244412	-0.326515
XL-VLDL-L	-9.59828	2.3752	-9.01326	4.19689	-0.733487	0.327489	-0.587002	0.404846
XL-VLDL-P	13.5426	3.00013	11.8086	2.4857	0.776128	0.21343	0.589682	0.224162
XL-VLDL-PL	1.03534	8.74145	5.48651	9.72766	-0.0483381	0.517462	0.168323	0.587435
XL-VLDL-PL_%	3.50116	8.56635	-1.67576	6.3827	0.0688122	0.496708	-0.0417146	0.0356063
XL-VLDL-TG	13.9106	-6.47667	11.9921	-8.04921	0.688098	-0.420845	0.514855	-0.501029
XL-VLDL-TG_%	14.0681	-6.05022	11.4926	-8.40616	0.702346	-0.397791	0.316266	-0.35115
XS-VLDL-C	-8.54548	-6.50569	-8.00575	-7.14226	-0.733039	-0.307813	-0.626323	-0.48409
XS-VLDL-C_%	-8.39394	-6.75223	-7.26849	-7.68298	-0.704965	-0.257991	-0.564882	-0.511339
XS-VLDL-CE	-7.82648	-7.18112	-6.42572	-7.99547	-0.620658	-0.318482	-0.463415	-0.497088
XS-VLDL-CE_%	-7.40908	-7.6094	-5.33252	-8.48772	-0.571023	-0.328032	-0.371326	-0.508294
XS-VLDL-FC	-10.0413	-2.68915	-10.4041	-2.97629	-0.814495	-0.160388	-0.760495	-0.19004
XS-VLDL-FC_%	-9.31103	-1.49852	-10.0152	-2.20084	-0.689764	-0.122964	-0.677183	-0.106358
XS-VLDL-L	-9.8492	-4.06866	-10.2216	-3.79067	-0.904569	-0.178724	-0.86063	-0.253988
XS-VLDL-P	4.99397	10.9641	0.122589	10.7463	0.137826	0.935153	-0.0369429	0.895801
XS-VLDL-PL	-5.71954	8.07634	-5.8423	7.75838	-0.604485	0.546429	-0.529088	0.660941
XS-VLDL-PL_%	-2.85485	9.54907	-4.17036	8.64605	-0.450969	0.609098	-0.404767	0.717389
XS-VLDL-TG	14.927	0.273915	14.5219	-0.250979	0.915351	0.0456732	0.891253	0.070264
XS-VLDL-TG_%	14.9199	0.342412	14.4886	-0.218057	0.917059	0.0519639	0.891678	0.0743858
XXL-VLDL-C	-1.02403	8.63418	-2.81949	6.54595	-0.25482	0.491027	-0.234348	0.289751
XXL-VLDL-C_%	-1.40431	8.46772	-4.23802	6.42461	-0.273748	0.47945	-0.276742	0.247177
XXL-VLDL-CE	-4.6935	6.49138	-5.91619	5.41882	-0.432209	0.382589	-0.398532	0.220804
XXL-VLDL-CE_%	-4.95987	6.24923	-1.1871	-5.27103	-0.444815	0.37012	-0.0936774	-0.0973687
XXL-VLDL-FC	14.4248	2.8122	13.8671	1.33469	0.78677	0.237698	0.550912	0.229843
XXL-VLDL-FC_%	14.5835	2.20658	13.6495	2.49622	0.791315	0.194995	0.34331	0.155109
XXL-VLDL-L	4.68749	9.50739	2.97849	7.58217	0.0724301	0.584769	0.0504395	0.382933
XXL-VLDL-P	11.9382	2.44778	9.94641	2.88062	0.602771	0.197388	0.489757	0.336287
XXL-VLDL-PL	13.0847	0.660796	10.4977	1.54955	0.51881	0.135237	0.33618	0.208527
XXL-VLDL-PL_%	12.8286	-1.12916	1.96093	-1.10078	0.499845	0.0523878	-0.113049	-0.0769073
XXL-VLDL-TG	5.07746	-11.7426	5.69246	-9.23301	0.221962	-0.560656	0.179111	-0.350501
XXL-VLDL-TG_%	4.0266	-12.0096	5.12189	-9.93526	0.161096	-0.578506	0.112485	-0.308374
%Basophils	5.65514	10.5765			-0.0398116	0.356129
%Eosinophils	13.7232	3.74033			0.13575	0.0479272
%Lymphocytes	-9.80651	0.602196			-0.181753	0.084755
%Monocytes	1.8606	3.93163			0.0306844	-0.131701
%Neutrophils	13.219	-6.63423			0.137983	-0.0700015
Adiponectin	-10.4731	1.25665	2.33081	2.98213	-0.462181	0.170556	-0.113089	0.117224
Basophils	12.6661	4.53201			0.183057	0.0804449
Eosinophils	12.29	5.7739			0.186902	0.10491
high sensitivity C-reactive proteins (hsCRP)	12.1126	5.81734	12.5513	4.30708	0.230532	0.177492	0.251314	0.256849
IL-18	6.15605	7.96938	1.70501	5.07603	0.0805398	0.139111	0.0893784	0.0726668
IL-18pba	12.5072	4.69471	1.11249	4.0717	0.255241	0.222951	0.0438697	0.0399558
IL-1B	-0.538294	7.60274	7.75519	-9.84655	0.00308718	0.120969	0.0643693	-0.0260703
Blood IL-6	7.56063	8.29627	7.64579	5.62264	0.142652	0.0850634	0.0687013	0.124399
Leptin	0.638524	9.68105	10.5754	6.29499	0.0587285	0.203486	0.175573	0.307366
Leukocytes	12.8044	3.62103			0.294771	0.0995351
Lymphocytes	3.1578	7.56139			0.0769802	0.13948
Monocytes	10.9412	4.87269			0.237057	-0.00747247
Neutrophils	14.0798	1.28689			0.281653	0.0421873
Resistin	11.5208	5.04384	10.8866	0.846974	0.0815541	0.190099	0.185675	0.0381239
IL-1B response to C. Albicans	-0.143449	7.66807			-0.00175056	0.12645
IL-1B response to LPS	5.08531	-8.84031			0.0113289	-0.0793446
IL-1B response to P. Gingivalis	7.36145	-12.2848			0.0694467	-0.130405
IL-1B response to PHA	2.17525	-12.6377			-0.0186676	-0.289439
IL-1B response to S. Aureus	1.71755	-6.40842			-0.0148047	-0.0165691
IL-1RA response to C. Albicans	1.90769	-1.64689			0.103394	-0.0630295
IL-1RA response to LPS	7.28297	-3.88014			0.159731	-0.070584
IL-1RA response to P. Gingivalis	5.57656	-9.32077			0.153292	-0.147969
IL-1RA response to PHA	5.76437	-9.06415			0.172468	-0.187082
IL-1RA response to S. Aureus	4.80076	-8.29131			0.138686	-0.143235
IL-6 response to P. Gingivalis	5.83387	0.512309			0.0755248	0.022126
IL-6 response to S. Aureus	6.62502	-4.9026			0.0984203	-0.0483138
IL-6 response to C. Albicans	6.981	5.63343			-0.00140264	-0.0200921
IL-6 response to LPS	3.64215	-4.70533			0.102262	-0.0739054
IL-6 response to PHA	0.584503	-12.2576			0.0791785	-0.342493
TNF-a response to S. Aureus	-1.87812	-8.79951			0.00988919	-0.118931
TNF-a response to C. Albicans	-6.0697	-1.2046			-0.0356187	-0.0453149
TNF-a response to LPS	-0.664443	-8.87986			0.0418835	-0.151001
TNF-a response to P. Gingivalis	5.55423	-10.5803			0.0742371	-0.102601
TNF-a response to PHA	-0.965211	-12.8299			0.0637725	-0.327247
IFNg response to A. Fumigatus (7 days)			12.0457	-4.45826			0.0667731	-0.143658
IFNg response to B. Burgdorferi (7 days)			-0.991654	-0.692738			0.00208396	-0.0433892
IFNg response to Bacteroides (7 days)			7.77905	-0.218495			0.0428681	0.0729131
IFNg response to Borrelia (7 days)			3.92843	-7.65827			0.0424384	-0.200069
IFNg response to C. Albicans (7 days)			0.476543	4.44265			0.0372932	-0.0462087
IFNg response to C. Albicans (hyphae; 7 days)			11.4989	-3.14133			0.150008	-0.0680842
IFNg response to Cryptococcus (7 days)			9.18167	-6.64432			0.0748279	-0.109932
IFNg response to MTB (7 days)			10.9876	-1.23865			0.0385402	-0.0908248
IFNg response to S. Aureus (7 days)			6.71264	-7.14562			0.00840691	-0.1919
IL-17 response to A. Fumigatus (7 days)			0.659485	-9.53605			0.000808728	-0.0582582
IL-17 response to B. Burgdorferi (7 days)			-4.98791	-0.7234			-0.0209542	0.0105073
IL-17 response to Bacteroides (7 days)			1.0859	-2.71972			0.0247258	0.0569312
IL-17 response to Borrelia (7 days)			0.180544	-7.58317			-0.0303183	-0.0673126
IL-17 response to C. Albicans (7 days)			7.44988	-6.00243			0.0597344	-0.0681079
IL-17 response to C. Albicans (hyphae; 7 days)			9.46377	1.30792			0.05642	-0.0432176
IL-17 response to Cryptococcus (7 days)			7.19331	2.67532			0.00213019	0.0130297
IL-17 response to MTB (7 days)			7.619	4.03282			0.0453666	0.0192905
IL-17 response to S. Aureus (7 days)			5.64219	-9.84538			0.0497967	-0.0165851
IL-22 response to A. Fumigatus (7 days)			9.43716	-7.40987			0.061494	-0.131515
IL-22 response to B. Burgdorferi (7 days)			-7.98284	-1.08316			-0.0717248	-0.0586933
IL-22 response to Bacteroides (7 days)			-1.03329	-0.528894			-0.0183972	0.0299982
IL-22 response to Borrelia (7 days)			-2.35581	-9.7201			-0.00851042	-0.2077
IL-22 response to C. Albicans (7 days)			-3.52885	6.71663			0.000128826	-0.0475835
IL-22 response to C. Albicans (hyphae; 7 days)			8.3628	0.235715			0.119084	-0.115296
IL-22 response to Cryptococcus (7 days)			10.7166	-1.67843			0.115093	-0.095082
IL-22 response to MTB (7 days)			10.0358	1.74549			0.0757937	-0.0602344
IL-22 response to S. Aureus (7 days)			9.90678	-2.74615			0.13084	-0.160103

## Sheet: SuppTable2B
Supplementary Table 2B
	S-LDL-TG	Erythrocytes	VAT/SAT ratio	IDL-TG	Hemoglobin	IDL-TG_%	XXL-VLDL-PL_%	S-VLDL-TG	S-VLDL-TG_%	HOMA-IR	M-LDL-TG_%	VEGF	M-LDL-TG	L-LDL-TG_%	L-LDL-TG	Waist Circumference	XL-VLDL-TG_%	XL-VLDL-TG	%Neutrophils	IL-1RA response to LPS	M-VLDL-TG	visceral adipose tissue (VAT)	M-VLDL-TG_%	IL-6 response to S. Aureus	L-VLDL-TG	IL-1RA response to C. Albicans	XL-HDL-C_%	L-VLDL-TG_%	XL-HDL-CE_%	XL-HDL-C	XL-HDL-CE	IL-6 response to LPS	M-LDL-PL_%	IL-1RA response to PHA	IL-1B response to P. Gingivalis	IL-1RA response to P. Gingivalis	IL-1RA response to S. Aureus	IL-1B response to LPS	S-LDL-PL_%	TNFa response to P. Gingivalis	M-LDL-PL	XXL-VLDL-TG	Deep SAT	S-LDL-PL	Mean corpuscular Hb concentration	XXL-VLDL-TG_%	SFA/FA ratio	IL-1B response to S. Aureus	S-HDL-PL_%
S-LDL-TG	1	0.423534	0.62166	0.98579	0.775378	0.986166	0.752854	0.927916	0.927093	-0.0125176	0.93591	0.820998	0.929298	0.959303	0.95577	0.693642	0.777379	0.758935	0.743787	0.48116	0.700445	0.47697	0.690063	0.372096	0.56226	0.0588157	0.264824	0.530848	0.276106	0.192573	0.212898	0.196788	0.406382	0.30656	0.125428	0.0403593	0.152815	0.226164	0.259934	0.157631	0.236914	-0.0321014	0.125965	0.155044	0.0737523	-0.111033	0.0509236	0.0124023	-0.0182168
Erythrocytes	0.423534	1	0.785014	0.341888	0.846204	0.347083	0.4147	0.577464	0.577219	0.725785	0.132598	0.63266	0.124504	0.27571	0.269236	0.476094	0.313402	0.307077	0.556834	-0.454547	0.477508	0.582321	0.465123	-0.25691	0.27343	-0.674266	0.75713	0.229396	0.701667	0.731131	0.681429	-0.632987	0.200179	-0.43854	0.255534	-0.0096452	-0.500231	-0.405476	0.0845051	-0.303911	0.123412	0.296182	-0.538505	0.0402165	-0.128835	0.233916	0.104357	-0.672821	-0.0457346
VAT/SAT ratio	0.62166	0.785014	1	0.510438	0.904716	0.515374	0.757316	0.63158	0.631575	0.470517	0.409951	0.65622	0.403125	0.509575	0.504408	0.795523	0.438953	0.428862	0.676769	-0.0715157	0.524905	0.859062	0.50079	-0.121996	0.359581	-0.409607	0.581131	0.307533	0.547409	0.543362	0.517183	-0.235532	0.354091	-0.156882	0.165984	0.0138127	-0.268151	-0.142413	0.234364	-0.255392	0.243826	0.352952	-0.269834	0.169584	0.0409753	0.282503	0.400942	-0.586964	0.0924342
IDL-TG	0.98579	0.341888	0.510438	1	0.697542	0.999962	0.671438	0.923026	0.922735	-0.112162	0.954844	0.803737	0.95074	0.975191	0.972854	0.617964	0.809795	0.793437	0.725187	0.546244	0.723025	0.395125	0.718096	0.44072	0.60539	0.118012	0.25	0.58274	0.27189	0.17874	0.209213	0.271627	0.452909	0.399721	0.170277	0.0728361	0.25027	0.329578	0.316528	0.274365	0.292438	-0.0576889	0.21293	0.214773	0.127197	-0.13114	0.00744745	0.149589	0.0310196
Hemoglobin	0.775378	0.846204	0.904716	0.697542	1	0.701949	0.784168	0.841807	0.841627	0.524594	0.549144	0.784384	0.541383	0.657134	0.651503	0.803951	0.640823	0.628748	0.781144	0.00918232	0.71051	0.762465	0.690272	-0.0138997	0.52761	-0.336495	0.642487	0.478134	0.619684	0.590122	0.575346	-0.245411	0.37529	-0.0822788	0.294164	0.113647	-0.162231	-0.0870695	0.240692	-0.123355	0.245705	0.309232	-0.202944	0.159421	0.065199	0.227775	0.12226	-0.444773	0.0439549
IDL-TG_%	0.986166	0.347083	0.515374	0.999962	0.701949	1	0.674029	0.92516	0.924915	-0.10725	0.953949	0.806174	0.949952	0.975652	0.97333	0.622333	0.812853	0.796665	0.730051	0.544635	0.727989	0.401845	0.723009	0.439497	0.610275	0.114707	0.257121	0.587491	0.279002	0.185981	0.216456	0.269733	0.458106	0.400186	0.176666	0.0772519	0.250699	0.330508	0.321857	0.275663	0.297993	-0.050396	0.213139	0.220163	0.13195	-0.124025	0.0105295	0.146709	0.0365401
XXL-VLDL-PL_%	0.752854	0.4147	0.757316	0.671438	0.784168	0.674029	1	0.718371	0.717806	0.305801	0.641985	0.483379	0.635462	0.681176	0.677864	0.90177	0.688582	0.676415	0.678153	0.306755	0.632842	0.706448	0.604167	0.0335553	0.551609	0.0458327	0.332119	0.505491	0.337435	0.282191	0.293089	0.0999391	0.285163	0.123369	0.175748	0.141572	0.0932287	0.0566204	0.204259	-0.00297166	0.167572	0.344893	0.0403325	0.123568	0.203849	0.275558	0.0890819	-0.279695	0.0840709
S-VLDL-TG	0.927916	0.577464	0.63158	0.923026	0.841807	0.92516	0.718371	1	0.999964	0.192695	0.78457	0.811432	0.778844	0.857715	0.853339	0.702822	0.885297	0.871696	0.778174	0.359496	0.850062	0.52413	0.844324	0.211914	0.710094	0.0176709	0.478354	0.678277	0.482162	0.413609	0.425188	0.0370121	0.433264	0.236208	0.331793	0.208508	0.17937	0.189494	0.304328	0.207167	0.29148	0.118819	0.0887771	0.206972	0.165917	0.0380512	-0.132606	-0.0528295	0.0316012
S-VLDL-TG_%	0.927093	0.577219	0.631575	0.922735	0.841627	0.924915	0.717806	0.999964	1	0.191919	0.784866	0.812599	0.779372	0.858693	0.854398	0.703857	0.88792	0.874592	0.781939	0.361188	0.854136	0.527594	0.848511	0.213977	0.71534	0.0172954	0.482662	0.683777	0.486882	0.418172	0.430151	0.0391867	0.44042	0.241362	0.338716	0.213738	0.183443	0.1946	0.312088	0.212614	0.299308	0.125315	0.0933278	0.215004	0.173423	0.0447126	-0.12877	-0.0496377	0.0397509
HOMA-IR	-0.0125176	0.725785	0.470517	-0.112162	0.524594	-0.10725	0.305801	0.192695	0.191919	1	-0.287514	0.13816	-0.295732	-0.178349	-0.183802	0.315921	0.073474	0.0745088	0.240222	-0.587363	0.221453	0.397904	0.20486	-0.424734	0.114401	-0.507042	0.553899	0.0768927	0.509662	0.553843	0.509912	-0.692648	-0.155984	-0.567381	0.282047	0.182428	-0.464697	-0.586303	-0.17563	-0.357641	-0.149445	0.427319	-0.537893	-0.179056	-0.0808926	0.397508	-0.194375	-0.680804	-0.124632
M-LDL-TG_%	0.93591	0.132598	0.409951	0.954844	0.549144	0.953949	0.641985	0.78457	0.784866	-0.287514	1	0.724087	0.999579	0.982834	0.982869	0.57764	0.725671	0.712069	0.688107	0.664058	0.622532	0.355536	0.616408	0.564074	0.551935	0.213918	0.0934403	0.537497	0.129269	0.0275309	0.0714138	0.433218	0.495234	0.542966	0.124357	0.0612575	0.331907	0.426229	0.376105	0.336411	0.341603	-0.0515813	0.344286	0.28205	0.202384	-0.112753	0.153656	0.279854	0.12561
VEGF	0.820998	0.63266	0.65622	0.803737	0.784384	0.806174	0.483379	0.811432	0.812599	0.13816	0.724087	1	0.722131	0.79022	0.787028	0.535697	0.595142	0.585901	0.8029	0.208878	0.667751	0.557549	0.666477	0.272945	0.503562	-0.259026	0.473071	0.477775	0.458841	0.420561	0.415642	-0.0732953	0.545863	0.2154	0.281298	0.121727	-0.0378542	0.130152	0.391138	0.0757509	0.404224	0.110826	0.0319016	0.309801	0.152054	0.0404926	0.259291	-0.0748799	0.120096
M-LDL-TG	0.929298	0.124504	0.403125	0.95074	0.541383	0.949952	0.635462	0.778844	0.779372	-0.295732	0.999579	0.722131	1	0.983646	0.984016	0.575832	0.730285	0.717631	0.695363	0.671442	0.630851	0.360666	0.625176	0.573925	0.565508	0.215544	0.102185	0.552301	0.139927	0.0372968	0.0830106	0.444593	0.516773	0.561994	0.144212	0.0755814	0.347473	0.445184	0.400533	0.35623	0.366043	-0.0335094	0.361131	0.307815	0.225909	-0.0935796	0.166401	0.29485	0.152653
L-LDL-TG_%	0.959303	0.27571	0.509575	0.975191	0.657134	0.975652	0.681176	0.857715	0.858693	-0.178349	0.982834	0.79022	0.983646	1	0.999921	0.642795	0.798378	0.78708	0.778562	0.593664	0.732577	0.460091	0.726394	0.515585	0.647299	0.108731	0.266607	0.629513	0.299038	0.201291	0.242087	0.3562	0.58245	0.509611	0.238844	0.111201	0.305919	0.420102	0.459672	0.353267	0.432416	0.062297	0.300208	0.364893	0.256756	-0.0047147	0.176647	0.206795	0.201425
L-LDL-TG	0.95577	0.269236	0.504408	0.972854	0.651503	0.97333	0.677864	0.853339	0.854398	-0.183802	0.982869	0.787028	0.984016	0.999921	1	0.640314	0.798563	0.787616	0.779134	0.597328	0.733446	0.459404	0.727413	0.521047	0.650728	0.110303	0.267401	0.633532	0.300851	0.202486	0.244253	0.362826	0.589334	0.51744	0.244531	0.114926	0.312329	0.428201	0.467988	0.361705	0.440557	0.0675595	0.307176	0.373833	0.26494	0.00116696	0.181509	0.214691	0.211347
Waist Circumference	0.693642	0.476094	0.795523	0.617964	0.803951	0.622333	0.90177	0.702822	0.703857	0.315921	0.57764	0.535697	0.575832	0.642795	0.640314	1	0.695861	0.689791	0.776328	0.354343	0.700036	0.861251	0.676175	0.0436793	0.630704	0.0801474	0.397725	0.590205	0.404287	0.354384	0.367022	0.0598637	0.461503	0.243044	0.327246	0.261963	0.214243	0.142162	0.38299	0.0321622	0.358656	0.474899	0.198466	0.311347	0.335301	0.409754	0.209458	-0.278587	0.259003
XL-VLDL-TG_%	0.777379	0.313402	0.438953	0.809795	0.640823	0.812853	0.688582	0.885297	0.88792	0.073474	0.725671	0.595142	0.730285	0.798378	0.798563	0.695861	1	0.999316	0.772666	0.54413	0.953835	0.533173	0.952454	0.306027	0.928906	0.239671	0.500712	0.914858	0.540183	0.452915	0.497013	0.293239	0.613927	0.523907	0.598762	0.490403	0.520067	0.479962	0.558777	0.546624	0.530339	0.375761	0.394953	0.482955	0.527982	0.315644	-0.141262	0.209138	0.358178
XL-VLDL-TG	0.758935	0.307077	0.428862	0.793437	0.628748	0.796665	0.676415	0.871696	0.874592	0.0745088	0.712069	0.585901	0.717631	0.78708	0.787616	0.689791	0.999316	1	0.775669	0.540972	0.959729	0.53835	0.958862	0.308123	0.941548	0.237269	0.514157	0.928886	0.554903	0.468456	0.513622	0.295544	0.632928	0.536844	0.624653	0.510784	0.532162	0.492096	0.582618	0.565945	0.554658	0.402984	0.407814	0.509408	0.555399	0.34467	-0.13092	0.219531	0.388439
%Neutrophils	0.743787	0.556834	0.676769	0.725187	0.781144	0.730051	0.678153	0.778174	0.781939	0.240222	0.688107	0.8029	0.695363	0.778562	0.779134	0.776328	0.772666	0.775669	1	0.337996	0.863236	0.773912	0.855553	0.228279	0.792618	-0.117283	0.607335	0.771007	0.623701	0.566576	0.58985	0.0213643	0.756826	0.426443	0.577912	0.371271	0.234085	0.279732	0.663639	0.252715	0.658158	0.543519	0.235837	0.59622	0.512254	0.481308	0.312577	-0.0638348	0.484547
IL-1RA response to LPS	0.48116	-0.454547	-0.0715157	0.546244	0.00918232	0.544635	0.306755	0.359496	0.361188	-0.587363	0.664058	0.208878	0.671442	0.593664	0.597328	0.354343	0.54413	0.540972	0.337996	1	0.380161	0.147852	0.385594	0.603868	0.468797	0.774287	-0.310024	0.48401	-0.235146	-0.346871	-0.268846	0.826639	0.406447	0.88239	0.174918	0.375261	0.850653	0.772096	0.398547	0.506409	0.349261	-0.0646941	0.822663	0.350766	0.439208	-0.07849	0.00283173	0.659135	0.26489
M-VLDL-TG	0.700445	0.477508	0.524905	0.723025	0.71051	0.727989	0.632842	0.850062	0.854136	0.221453	0.622532	0.667751	0.630851	0.732577	0.733446	0.700036	0.953835	0.959729	0.863236	0.380161	1	0.658618	0.999104	0.241167	0.965702	0.0384283	0.695565	0.951504	0.72576	0.658204	0.693105	0.135721	0.740178	0.470067	0.748961	0.554881	0.425246	0.429338	0.686173	0.520879	0.673717	0.561673	0.330849	0.62244	0.617129	0.5034	-0.00302088	0.11169	0.506478
visceral adipose tissue (VAT)	0.47697	0.582321	0.859062	0.395125	0.762465	0.401845	0.706448	0.52413	0.527594	0.397904	0.355536	0.557549	0.360666	0.460091	0.459404	0.861251	0.533173	0.53835	0.773912	0.147852	0.658618	1	0.639978	-0.00634994	0.601307	-0.181433	0.608831	0.567324	0.60609	0.588723	0.591523	-0.0335369	0.62877	0.203241	0.511066	0.398371	0.106158	0.16518	0.570086	0.0397247	0.57143	0.685015	0.146519	0.527223	0.486018	0.634339	0.480679	-0.323628	0.489064
M-VLDL-TG_%	0.690063	0.465123	0.50079	0.718096	0.690272	0.723009	0.604167	0.844324	0.848511	0.20486	0.616408	0.666477	0.625176	0.726394	0.727413	0.676175	0.952454	0.958862	0.855553	0.385594	0.999104	0.639978	1	0.249956	0.967836	0.0453316	0.692322	0.955601	0.723354	0.655735	0.691391	0.140967	0.745662	0.48307	0.756842	0.563223	0.43799	0.442653	0.693498	0.538712	0.682078	0.552808	0.344229	0.63107	0.624133	0.495993	-0.0110913	0.133827	0.511708
IL-6 response to S. Aureus	0.372096	-0.25691	-0.121996	0.44072	-0.0138997	0.439497	0.0335553	0.211914	0.213977	-0.424734	0.564074	0.272945	0.573925	0.515585	0.521047	0.0436793	0.306027	0.308123	0.228279	0.603868	0.241167	-0.00634994	0.249956	1	0.288653	0.240332	-0.0816766	0.310869	-0.00664152	-0.113038	-0.0341029	0.690421	0.385611	0.633946	0.260442	0.313089	0.477832	0.60424	0.37281	0.633653	0.352295	-0.0976613	0.464832	0.342146	0.275576	-0.101236	0.144913	0.633381	0.269406
L-VLDL-TG	0.56226	0.27343	0.359581	0.60539	0.52761	0.610275	0.551609	0.710094	0.71534	0.114401	0.551935	0.503562	0.565508	0.647299	0.650728	0.630704	0.928906	0.941548	0.792618	0.468797	0.965702	0.601307	0.967836	0.288653	1	0.176759	0.622997	0.998021	0.670553	0.597912	0.648182	0.270561	0.784741	0.612039	0.82816	0.665049	0.589421	0.559082	0.774372	0.664703	0.753823	0.647318	0.493802	0.727628	0.772615	0.606141	0.00139449	0.266686	0.647265
IL-1RA response to C. Albicans	0.0588157	-0.674266	-0.409607	0.118012	-0.336495	0.114707	0.0458327	0.0176709	0.0172954	-0.507042	0.213918	-0.259026	0.215544	0.108731	0.110303	0.0801474	0.239671	0.237269	-0.117283	0.774287	0.0384283	-0.181433	0.0453316	0.240332	0.176759	1	-0.603081	0.197758	-0.551263	-0.613622	-0.563615	0.593369	-0.0453157	0.61479	-0.017961	0.322628	0.780556	0.467837	0.00993799	0.311419	-0.0433398	-0.185435	0.721196	-0.00216405	0.258514	-0.170555	-0.381248	0.578464	-0.00659099
XL-HDL-C_%	0.264824	0.75713	0.581131	0.25	0.642487	0.257121	0.332119	0.478354	0.482662	0.553899	0.0934403	0.473071	0.102185	0.266607	0.267401	0.397725	0.500712	0.514157	0.607335	-0.310024	0.695565	0.608831	0.692322	-0.0816766	0.622997	-0.603081	1	0.604841	0.993631	0.996758	0.992704	-0.299858	0.585757	-0.0760583	0.696822	0.322239	-0.129596	0.0532459	0.558505	0.25371	0.588173	0.678458	-0.19926	0.543256	0.389346	0.640669	0.207043	-0.277474	0.499049
L-VLDL-TG_%	0.530848	0.229396	0.307533	0.58274	0.478134	0.587491	0.505491	0.678277	0.683777	0.0768927	0.537497	0.477775	0.552301	0.629513	0.633532	0.590205	0.914858	0.928886	0.771007	0.48401	0.951504	0.567324	0.955601	0.310869	0.998021	0.197758	0.604841	1	0.656084	0.58219	0.635804	0.296149	0.795518	0.643659	0.840781	0.67846	0.620219	0.590561	0.792493	0.700494	0.771903	0.644163	0.526421	0.749749	0.794478	0.607253	-0.000383635	0.314231	0.671519
XL-HDL-CE_%	0.276106	0.701667	0.547409	0.27189	0.619684	0.279002	0.337435	0.482162	0.486882	0.509662	0.129269	0.458841	0.139927	0.299038	0.300851	0.404287	0.540183	0.554903	0.623701	-0.235146	0.72576	0.60609	0.723354	-0.00664152	0.670553	-0.551263	0.993631	0.656084	1	0.988782	0.997427	-0.211322	0.632059	0.0073787	0.743337	0.367306	-0.0451829	0.143105	0.61343	0.334205	0.638869	0.694949	-0.123443	0.598218	0.447658	0.659258	0.206948	-0.195171	0.555371
XL-HDL-C	0.192573	0.731131	0.543362	0.17874	0.590122	0.185981	0.282191	0.413609	0.418172	0.553843	0.0275309	0.420561	0.0372968	0.201291	0.202486	0.354384	0.452915	0.468456	0.566576	-0.346871	0.658204	0.588723	0.655735	-0.113038	0.597912	-0.613622	0.996758	0.58219	0.988782	1	0.993606	-0.315782	0.57744	-0.0897567	0.704303	0.330737	-0.137921	0.0424161	0.561516	0.25301	0.593019	0.704488	-0.202242	0.554365	0.405171	0.672373	0.21962	-0.279051	0.523226
XL-HDL-CE	0.212898	0.681429	0.517183	0.209213	0.575346	0.216456	0.293089	0.425188	0.430151	0.509912	0.0714138	0.415642	0.0830106	0.242087	0.244253	0.367022	0.497013	0.513622	0.58985	-0.268846	0.693105	0.591523	0.691391	-0.0341029	0.648182	-0.563615	0.992704	0.635804	0.997427	0.993606	1	-0.22679	0.627501	-0.00478762	0.750621	0.374457	-0.0542452	0.13331	0.618426	0.332259	0.645758	0.719304	-0.126644	0.610356	0.462241	0.688544	0.222868	-0.198431	0.578641
IL-6 response to LPS	0.196788	-0.632987	-0.235532	0.271627	-0.245411	0.269733	0.0999391	0.0370121	0.0391867	-0.692648	0.433218	-0.0732953	0.444593	0.3562	0.362826	0.0598637	0.293239	0.295544	0.0213643	0.826639	0.135721	-0.0335369	0.140967	0.690421	0.270561	0.593369	-0.299858	0.296149	-0.211322	-0.315782	-0.22679	1	0.333615	0.772095	0.128033	0.304161	0.746221	0.852374	0.378778	0.615867	0.334356	-0.0855954	0.713644	0.364061	0.410375	-0.0731229	0.129752	0.745563	0.337886
M-LDL-PL_%	0.406382	0.200179	0.354091	0.452909	0.37529	0.458106	0.285163	0.433264	0.44042	-0.155984	0.495234	0.545863	0.516773	0.58245	0.589334	0.461503	0.613927	0.632928	0.756826	0.406447	0.740178	0.62877	0.745662	0.385611	0.784741	-0.0453157	0.585757	0.795518	0.632059	0.57744	0.627501	0.333615	1	0.688707	0.739928	0.477997	0.482087	0.672413	0.981617	0.610907	0.981473	0.642199	0.531204	0.959433	0.795244	0.620724	0.543583	0.316239	0.877488
IL-1RA response to PHA	0.30656	-0.43854	-0.156882	0.399721	-0.0822788	0.400186	0.123369	0.236208	0.241362	-0.567381	0.542966	0.2154	0.561994	0.509611	0.51744	0.243044	0.523907	0.536844	0.426443	0.88239	0.470067	0.203241	0.48307	0.633946	0.612039	0.61479	-0.0760583	0.643659	0.0073787	-0.0897567	-0.00478762	0.772095	0.688707	1	0.489746	0.551737	0.8939	0.882816	0.717425	0.723309	0.681937	0.244007	0.909446	0.697915	0.73408	0.24754	0.189728	0.767274	0.63528
IL-1B response to P. Gingivalis	0.125428	0.255534	0.165984	0.170277	0.294164	0.176666	0.175748	0.331793	0.338716	0.282047	0.124357	0.281298	0.144212	0.238844	0.244531	0.327246	0.598762	0.624653	0.577912	0.174918	0.748961	0.511066	0.756842	0.260442	0.82816	-0.017961	0.696822	0.840781	0.743337	0.704303	0.750621	0.128033	0.739928	0.489746	1	0.828817	0.476821	0.478049	0.787695	0.656124	0.791312	0.797892	0.408661	0.790416	0.832934	0.789425	0.062828	0.259689	0.777508
IL-1RA response to P. Gingivalis	0.0403593	-0.0096452	0.0138127	0.0728361	0.113647	0.0772519	0.141572	0.208508	0.213738	0.182428	0.0612575	0.121727	0.0755814	0.111201	0.114926	0.261963	0.490403	0.510784	0.371271	0.375261	0.554881	0.398371	0.563223	0.313089	0.665049	0.322628	0.322239	0.67846	0.367306	0.330737	0.374457	0.304161	0.477997	0.551737	0.828817	1	0.615362	0.490562	0.542382	0.576577	0.532214	0.598518	0.554211	0.545722	0.766653	0.599117	-0.117859	0.37131	0.546552
IL-1RA response to S. Aureus	0.152815	-0.500231	-0.268151	0.25027	-0.162231	0.250699	0.0932287	0.17937	0.183443	-0.464697	0.331907	-0.0378542	0.347473	0.305919	0.312329	0.214243	0.520067	0.532162	0.234085	0.850653	0.425246	0.106158	0.43799	0.477832	0.589421	0.780556	-0.129596	0.620219	-0.0451829	-0.137921	-0.0542452	0.746221	0.482087	0.8939	0.476821	0.615362	1	0.839181	0.550367	0.693131	0.509829	0.217774	0.892468	0.541527	0.684877	0.228785	-0.123364	0.744378	0.512729
IL-1B response to LPS	0.226164	-0.405476	-0.142413	0.329578	-0.0870695	0.330508	0.0566204	0.189494	0.1946	-0.586303	0.426229	0.130152	0.445184	0.420102	0.428201	0.142162	0.479962	0.492096	0.279732	0.772096	0.429338	0.16518	0.442653	0.60424	0.559082	0.467837	0.0532459	0.590561	0.143105	0.0424161	0.13331	0.852374	0.672413	0.882816	0.478049	0.490562	0.839181	1	0.713178	0.768793	0.686245	0.189491	0.829452	0.702599	0.66928	0.196625	0.18187	0.799208	0.6355
S-LDL-PL_%	0.259934	0.0845051	0.234364	0.316528	0.240692	0.321857	0.204259	0.304328	0.312088	-0.17563	0.376105	0.391138	0.400533	0.459672	0.467988	0.38299	0.558777	0.582618	0.663639	0.398547	0.686173	0.570086	0.693498	0.37281	0.774372	0.00993799	0.558505	0.792493	0.61343	0.561516	0.618426	0.378778	0.981617	0.717425	0.787695	0.542382	0.550367	0.713178	1	0.677345	0.997248	0.702566	0.584843	0.9942	0.867121	0.694745	0.514463	0.379082	0.946758
TNFa response to P. Gingivalis	0.157631	-0.303911	-0.255392	0.274365	-0.123355	0.275663	-0.00297166	0.207167	0.212614	-0.357641	0.336411	0.0757509	0.35623	0.353267	0.361705	0.0321622	0.546624	0.565945	0.252715	0.506409	0.520879	0.0397247	0.538712	0.633653	0.664703	0.311419	0.25371	0.700494	0.334205	0.25301	0.332259	0.615867	0.610907	0.723309	0.656124	0.576577	0.693131	0.768793	0.677345	1	0.654142	0.334952	0.653605	0.67546	0.708027	0.345851	-0.0271323	0.746118	0.639434
M-LDL-PL	0.236914	0.123412	0.243826	0.292438	0.245705	0.297993	0.167572	0.29148	0.299308	-0.149445	0.341603	0.404224	0.366043	0.432416	0.440557	0.358656	0.530339	0.554658	0.658158	0.349261	0.673717	0.57143	0.682078	0.352295	0.753823	-0.0433398	0.588173	0.771903	0.638869	0.593019	0.645758	0.334356	0.981473	0.681937	0.791312	0.532214	0.509829	0.686245	0.997248	0.654142	1	0.70342	0.548843	0.994075	0.849484	0.696147	0.531503	0.350088	0.943628
XXL-VLDL-TG	-0.0321014	0.296182	0.352952	-0.0576889	0.309232	-0.050396	0.344893	0.118819	0.125315	0.427319	-0.0515813	0.110826	-0.0335094	0.062297	0.0675595	0.474899	0.375761	0.402984	0.543519	-0.0646941	0.561673	0.685015	0.552808	-0.0976613	0.647318	-0.185435	0.678458	0.644163	0.694949	0.704488	0.719304	-0.0855954	0.642199	0.244007	0.797892	0.598518	0.217774	0.189491	0.702566	0.334952	0.70342	1	0.213341	0.721258	0.781621	0.996167	0.338642	-0.116503	0.800931
Deep SAT	0.125965	-0.538505	-0.269834	0.21293	-0.202944	0.213139	0.0403325	0.0887771	0.0933278	-0.537893	0.344286	0.0319016	0.361131	0.300208	0.307176	0.198466	0.394953	0.407814	0.235837	0.822663	0.330849	0.146519	0.344229	0.464832	0.493802	0.721196	-0.19926	0.526421	-0.123443	-0.202242	-0.126644	0.713644	0.531204	0.909446	0.408661	0.554211	0.892468	0.829452	0.584843	0.653605	0.548843	0.213341	1	0.58033	0.700769	0.228633	0.0673115	0.760775	0.549397
S-LDL-PL	0.155044	0.0402165	0.169584	0.214773	0.159421	0.220163	0.123568	0.206972	0.215004	-0.179056	0.28205	0.309801	0.307815	0.364893	0.373833	0.311347	0.482955	0.509408	0.59622	0.350766	0.62244	0.527223	0.63107	0.342146	0.727628	-0.00216405	0.543256	0.749749	0.598218	0.554365	0.610356	0.364061	0.959433	0.697915	0.790416	0.545722	0.541527	0.702599	0.9942	0.67546	0.994075	0.721258	0.58033	1	0.876409	0.722093	0.523469	0.386406	0.970869
Mean corpuscular Hb concentration	0.0737523	-0.128835	0.0409753	0.127197	0.065199	0.13195	0.203849	0.165917	0.173423	-0.0808926	0.202384	0.152054	0.225909	0.256756	0.26494	0.335301	0.527982	0.555399	0.512254	0.439208	0.617129	0.486018	0.624133	0.275576	0.772615	0.258514	0.389346	0.794478	0.447658	0.405171	0.462241	0.410375	0.795244	0.73408	0.832934	0.766653	0.684877	0.66928	0.867121	0.708027	0.849484	0.781621	0.700769	0.876409	1	0.788649	0.256869	0.445457	0.892633
XXL-VLDL-TG_%	-0.111033	0.233916	0.282503	-0.13114	0.227775	-0.124025	0.275558	0.0380512	0.0447126	0.397508	-0.112753	0.0404926	-0.0935796	-0.0047147	0.00116696	0.409754	0.315644	0.34467	0.481308	-0.07849	0.5034	0.634339	0.495993	-0.101236	0.606141	-0.170555	0.640669	0.607253	0.659258	0.672373	0.688544	-0.0731229	0.620724	0.24754	0.789425	0.599117	0.228785	0.196625	0.694745	0.345851	0.696147	0.996167	0.228633	0.722093	0.788649	1	0.340325	-0.0854842	0.815117
SFA/FA ratio	0.0509236	0.104357	0.400942	0.00744745	0.12226	0.0105295	0.0890819	-0.132606	-0.12877	-0.194375	0.153656	0.259291	0.166401	0.176647	0.181509	0.209458	-0.141262	-0.13092	0.312577	0.00283173	-0.00302088	0.480679	-0.0110913	0.144913	0.00139449	-0.381248	0.207043	-0.000383635	0.206948	0.21962	0.222868	0.129752	0.543583	0.189728	0.062828	-0.117859	-0.123364	0.18187	0.514463	-0.0271323	0.531503	0.338642	0.0673115	0.523469	0.256869	0.340325	1	-0.122625	0.529793
IL-1B response to S. Aureus	0.0124023	-0.672821	-0.586964	0.149589	-0.444773	0.146709	-0.279695	-0.0528295	-0.0496377	-0.680804	0.279854	-0.0748799	0.29485	0.206795	0.214691	-0.278587	0.209138	0.219531	-0.0638348	0.659135	0.11169	-0.323628	0.133827	0.633381	0.266686	0.578464	-0.277474	0.314231	-0.195171	-0.279051	-0.198431	0.745563	0.316239	0.767274	0.259689	0.37131	0.744378	0.799208	0.379082	0.746118	0.350088	-0.116503	0.760775	0.386406	0.445457	-0.0854842	-0.122625	1	0.343101
S-HDL-PL_%	-0.0182168	-0.0457346	0.0924342	0.0310196	0.0439549	0.0365401	0.0840709	0.0316012	0.0397509	-0.124632	0.12561	0.120096	0.152653	0.201425	0.211347	0.259003	0.358178	0.388439	0.484547	0.26489	0.506478	0.489064	0.511708	0.269406	0.647265	-0.00659099	0.499049	0.671519	0.555371	0.523226	0.578641	0.337886	0.877488	0.63528	0.777508	0.546552	0.512729	0.6355	0.946758	0.639434	0.943628	0.800931	0.549397	0.970869	0.892633	0.815117	0.529793	0.343101	1
S-HDL-FC_%	-0.0298819	-0.0503261	0.060123	0.0283403	0.0243263	0.033657	0.0724248	0.0404352	0.0485157	-0.140046	0.10918	0.0900144	0.136095	0.190265	0.200181	0.226037	0.378116	0.408558	0.460124	0.232731	0.518095	0.439375	0.524504	0.212941	0.661235	-0.0147106	0.522953	0.686494	0.576773	0.549093	0.60136	0.313571	0.862358	0.606911	0.767955	0.51073	0.503436	0.623083	0.936171	0.658208	0.932445	0.794546	0.52068	0.961588	0.882017	0.809267	0.4789	0.343853	0.990645
L-LDL-PL_%	-0.0275446	-0.156513	-0.0594618	0.0554905	-0.0741691	0.059904	-0.0949046	0.0165267	0.0246518	-0.297901	0.149476	0.142517	0.177215	0.207716	0.217952	0.106649	0.334975	0.364029	0.411386	0.376335	0.460881	0.341602	0.475912	0.388566	0.606272	0.0931363	0.38745	0.641606	0.452378	0.408819	0.473161	0.447731	0.876111	0.743063	0.747831	0.561592	0.611346	0.763085	0.940964	0.718374	0.941909	0.622627	0.658217	0.965681	0.861709	0.64284	0.467524	0.529643	0.954107
S-HDL-PL	-0.0624179	-0.0858399	0.0518213	-0.0108001	-0.00369697	-0.00544244	0.0491883	-0.0142161	-0.00606099	-0.143313	0.0904034	0.074851	0.117783	0.161601	0.171774	0.223505	0.323602	0.354521	0.443609	0.26024	0.469342	0.456994	0.475166	0.260939	0.61965	0.00934138	0.46929	0.645957	0.526512	0.496483	0.55234	0.3476	0.855942	0.63425	0.763568	0.543003	0.519357	0.637302	0.932957	0.639507	0.929514	0.791905	0.55729	0.961622	0.890537	0.810256	0.523767	0.358425	0.998728
S-HDL-FC	-0.0954829	-0.106182	-0.00235046	-0.0329087	-0.0459421	-0.0278436	0.0183216	-0.0246961	-0.0166281	-0.165342	0.0551119	0.0224367	0.0824462	0.130268	0.140519	0.169308	0.329058	0.36044	0.397473	0.22063	0.464965	0.386693	0.472445	0.197519	0.621393	0.00538293	0.483461	0.649725	0.538304	0.514055	0.566635	0.323238	0.82756	0.600326	0.747807	0.503502	0.510228	0.622646	0.912854	0.660087	0.90891	0.778888	0.526802	0.944997	0.875253	0.799666	0.462423	0.365868	0.985191
IL-1B response to PHA	-0.0687128	-0.390946	-0.318531	0.0455243	-0.255165	0.0476847	-0.180493	-0.0529474	-0.0456635	-0.42718	0.171512	-0.0024756	0.198546	0.186959	0.198136	-0.0416662	0.308367	0.335692	0.263057	0.497607	0.367824	0.0958624	0.385589	0.515043	0.550271	0.293264	0.174941	0.596082	0.259052	0.193129	0.27532	0.582456	0.734933	0.823973	0.682229	0.573662	0.735323	0.827907	0.821515	0.806348	0.807857	0.463798	0.750726	0.84862	0.815606	0.494933	0.249039	0.750517	0.850696
Peripheral augmentation index	-0.00530317	-0.819509	-0.608316	0.0822871	-0.5312	0.0771375	-0.0977371	-0.112164	-0.112502	-0.701045	0.22922	-0.329194	0.233351	0.102291	0.106173	-0.183427	0.116544	0.114881	-0.226243	0.665602	-0.0992869	-0.469691	-0.0887109	0.266206	0.0534917	0.820455	-0.654279	0.0851189	-0.601132	-0.656342	-0.606491	0.627495	-0.0736085	0.567437	-0.165099	0.0626404	0.630793	0.449775	-0.0123116	0.372656	-0.0668046	-0.300648	0.600251	-0.0137947	0.173347	-0.274767	-0.310878	0.648528	-0.00507776
S-LDL-FC_%	-0.231072	-0.0954204	-0.0914738	-0.1606	-0.149928	-0.155681	-0.222247	-0.159647	-0.151469	-0.18037	-0.0777512	0.018251	-0.0497025	-0.00272558	0.00758692	-0.019489	0.14356	0.176441	0.297883	0.110645	0.32094	0.286463	0.335217	0.206208	0.46568	-0.102819	0.449864	0.501225	0.49724	0.488248	0.53336	0.241713	0.787784	0.537118	0.706063	0.459324	0.412309	0.575087	0.869823	0.590829	0.883752	0.682763	0.468376	0.916661	0.78517	0.714256	0.516974	0.369514	0.946153
IL-6 response to PHA	-0.178433	-0.513767	-0.387253	-0.0704132	-0.378214	-0.0686446	-0.225376	-0.185307	-0.178367	-0.478236	0.0821164	-0.153119	0.108983	0.0794732	0.0909731	-0.100697	0.208301	0.23608	0.127701	0.504639	0.244851	0.0377717	0.26165	0.516243	0.453502	0.354521	0.0684284	0.5014	0.155043	0.0936396	0.177289	0.655728	0.645667	0.807703	0.60995	0.556805	0.748373	0.816856	0.755434	0.790413	0.737774	0.431118	0.754752	0.792695	0.789964	0.472307	0.263232	0.747348	0.825222
M-LDL-FC_%	-0.231194	-0.14335	-0.115621	-0.159575	-0.172244	-0.15483	-0.208988	-0.167592	-0.159371	-0.201681	-0.0639108	-0.00124529	-0.0355413	0.00266505	0.0132199	-0.00867408	0.154358	0.187511	0.294887	0.158051	0.321014	0.283715	0.334995	0.229647	0.477675	-0.0439967	0.410221	0.514362	0.461406	0.448566	0.497297	0.282751	0.78615	0.578566	0.712276	0.491933	0.458253	0.601315	0.873352	0.613396	0.883065	0.688248	0.51625	0.919996	0.813992	0.72114	0.502718	0.405256	0.954599
L-LDL-PL	-0.276121	-0.264121	-0.217913	-0.191687	-0.267147	-0.187536	-0.271715	-0.212404	-0.204395	-0.28104	-0.0899662	-0.0785736	-0.0616243	-0.039813	-0.0290411	-0.0678329	0.139249	0.171871	0.205689	0.249682	0.275271	0.20679	0.292256	0.286721	0.45259	0.0874881	0.30786	0.494509	0.369186	0.34621	0.404616	0.393312	0.736981	0.642697	0.695853	0.541524	0.563263	0.685084	0.838969	0.664893	0.844388	0.610412	0.607238	0.888809	0.816877	0.649685	0.420218	0.514633	0.922933
M-LDL-FC	-0.309377	-0.173037	-0.164695	-0.237677	-0.230105	-0.233031	-0.261292	-0.237346	-0.229238	-0.188858	-0.142426	-0.074986	-0.114128	-0.077741	-0.0671005	-0.0654867	0.0940492	0.12812	0.224446	0.110754	0.262359	0.236924	0.276744	0.195226	0.427823	-0.050014	0.389528	0.466159	0.439375	0.432995	0.479615	0.262347	0.733072	0.536376	0.693942	0.482862	0.437203	0.570182	0.832419	0.595534	0.843425	0.681514	0.48931	0.886783	0.792607	0.720131	0.477119	0.39595	0.936602
S-LDL-FC	-0.325788	-0.144175	-0.16372	-0.253353	-0.231503	-0.248681	-0.295046	-0.248227	-0.240199	-0.179435	-0.16777	-0.0716609	-0.139748	-0.0978113	-0.0873314	-0.0982176	0.0665109	0.100416	0.207987	0.0621919	0.243317	0.217549	0.258558	0.173649	0.400037	-0.101923	0.410936	0.438375	0.457233	0.455407	0.498503	0.224748	0.721691	0.494541	0.677153	0.445366	0.391623	0.542667	0.818141	0.573429	0.833376	0.662802	0.443671	0.874334	0.756781	0.701798	0.485057	0.370803	0.920863
Histidine	-0.386104	0.386033	0.329821	-0.459643	0.132122	-0.453461	0.0308228	-0.309296	-0.305712	0.535646	-0.462518	-0.153026	-0.45214	-0.355636	-0.352383	0.110918	-0.240248	-0.219712	0.102876	-0.607578	-0.0120521	0.427262	-0.025695	-0.313327	0.00701293	-0.65969	0.573384	-0.00318876	0.555324	0.615184	0.59487	-0.397992	0.213934	-0.340847	0.327363	0.0650941	-0.386489	-0.256396	0.270982	-0.138125	0.301734	0.691925	-0.346418	0.322405	0.21228	0.707269	0.506356	-0.50376	0.458372
TNFa response to LPS	-0.272903	-0.544794	-0.316236	-0.19868	-0.36437	-0.196954	-0.150299	-0.247505	-0.242814	-0.414861	-0.101468	-0.373242	-0.0824335	-0.108061	-0.0997671	-0.0259323	0.121044	0.139707	-0.0827676	0.51999	0.0981641	0.0569737	0.106603	0.278365	0.290575	0.509689	-0.0753277	0.325173	0.00822258	-0.0537621	0.0264627	0.703605	0.389777	0.643634	0.409301	0.482201	0.770014	0.791347	0.51074	0.539996	0.487631	0.283594	0.70997	0.549108	0.603603	0.323567	0.100258	0.595049	0.601432
TNFa response to PHA	-0.329244	-0.421315	-0.360009	-0.237898	-0.370418	-0.234968	-0.276872	-0.273911	-0.26671	-0.33014	-0.116209	-0.24387	-0.0892674	-0.0944393	-0.0835672	-0.0993369	0.116469	0.147658	0.0896974	0.326892	0.205568	0.0865143	0.219753	0.281858	0.41406	0.291179	0.137407	0.459228	0.209273	0.175301	0.243058	0.451817	0.61532	0.673302	0.644427	0.54987	0.665971	0.688307	0.738253	0.662391	0.728772	0.548113	0.675126	0.791156	0.790328	0.594579	0.251452	0.59186	0.853333
TNFa response to S. Aureus	-0.327298	-0.711157	-0.699725	-0.203756	-0.657507	-0.2051	-0.459448	-0.343929	-0.339414	-0.562284	-0.0496332	-0.350774	-0.0295236	-0.106968	-0.0973942	-0.39973	0.0188836	0.0417792	-0.207873	0.411978	-0.0213335	-0.355626	0.00294003	0.537893	0.195866	0.465169	-0.222747	0.251646	-0.152452	-0.191639	-0.126551	0.590736	0.277536	0.643623	0.352404	0.432554	0.640105	0.612117	0.400067	0.79341	0.380268	0.114655	0.649848	0.445695	0.540072	0.170327	-0.036116	0.80768	0.487415
Subcutaneous adipose tissue (SAT)	-0.478925	-0.684804	-0.662443	-0.378915	-0.639184	-0.378687	-0.433125	-0.442554	-0.437227	-0.40176	-0.233105	-0.430738	-0.211406	-0.273815	-0.264423	-0.278948	-0.0506318	-0.023516	-0.161716	0.388149	-0.037634	-0.191061	-0.0175437	0.242618	0.200141	0.531872	-0.228952	0.252319	-0.166214	-0.185417	-0.128995	0.45352	0.288655	0.642307	0.420669	0.535494	0.691867	0.568571	0.430345	0.581655	0.413499	0.310452	0.75883	0.491371	0.649449	0.37187	-0.0110022	0.689067	0.574059
L-HDL-CE_%	-0.497798	-0.58757	-0.504207	-0.413985	-0.598157	-0.413012	-0.433272	-0.525983	-0.519636	-0.471266	-0.226122	-0.372838	-0.200614	-0.247654	-0.236522	-0.294851	-0.170361	-0.140021	-0.0951751	0.208093	-0.0917352	-0.101222	-0.0769902	0.163783	0.129958	0.232993	-0.0873198	0.179734	-0.0365193	-0.0343207	0.0107451	0.372464	0.450794	0.558439	0.360364	0.298792	0.483574	0.517446	0.577908	0.497232	0.570875	0.414988	0.576433	0.64743	0.644219	0.477495	0.37519	0.54258	0.742266
LDL diameter	-0.485023	-0.0877729	-0.106987	-0.470499	-0.299639	-0.466995	-0.44199	-0.530047	-0.524277	-0.11458	-0.34081	-0.127259	-0.31943	-0.304195	-0.295843	-0.233111	-0.400878	-0.373968	0.0125464	-0.210919	-0.186068	0.144304	-0.178288	0.0704184	-0.0872085	-0.354814	0.188105	-0.0581492	0.201627	0.237981	0.249496	-0.0125465	0.446413	0.16843	0.286474	0.0851166	-0.0234801	0.176404	0.510881	0.112054	0.543866	0.444713	0.132345	0.579628	0.375597	0.491665	0.726778	0.0612406	0.65913
XL-HDL-L	-0.675759	0.0732247	-0.154021	-0.663924	-0.279792	-0.659138	-0.41459	-0.483571	-0.478543	0.253707	-0.686314	-0.357796	-0.670149	-0.592064	-0.586895	-0.310824	-0.27792	-0.247879	-0.163904	-0.553922	-0.0696797	0.0521565	-0.0610311	-0.364821	0.0327256	-0.418577	0.468936	0.0528355	0.453316	0.538132	0.515579	-0.299259	0.203021	-0.178804	0.433261	0.244221	-0.139542	-0.0608594	0.318481	0.149134	0.354398	0.603125	-0.125164	0.401684	0.365037	0.648788	0.231535	-0.121618	0.520747
L-HDL-CE	-0.563837	-0.622776	-0.551667	-0.48145	-0.654307	-0.480712	-0.478673	-0.588366	-0.58234	-0.461909	-0.294388	-0.443638	-0.269627	-0.321417	-0.310455	-0.346557	-0.229773	-0.199563	-0.169636	0.176926	-0.157167	-0.152751	-0.142069	0.136331	0.0704267	0.243363	-0.129744	0.121172	-0.0800847	-0.0734144	-0.0300941	0.361325	0.380288	0.517012	0.323662	0.285658	0.46487	0.484057	0.516953	0.468244	0.510457	0.383589	0.552317	0.592231	0.604893	0.450849	0.338215	0.532257	0.699312
M-HDL-CE_%	-0.66659	-0.619194	-0.558378	-0.594543	-0.662667	-0.59297	-0.465592	-0.62575	-0.620051	-0.3184	-0.448333	-0.581647	-0.425172	-0.463288	-0.453204	-0.328583	-0.22556	-0.194746	-0.264507	0.149437	-0.16243	-0.12825	-0.148504	0.07814	0.0783311	0.306767	-0.103931	0.126089	-0.0494432	-0.0441871	0.00287262	0.372172	0.273634	0.451129	0.389299	0.424001	0.514614	0.480778	0.439383	0.468268	0.431918	0.425291	0.549916	0.522165	0.613027	0.496005	0.179011	0.49766	0.654888
M-HDL-CE	-0.68391	-0.644215	-0.582397	-0.611711	-0.690279	-0.610439	-0.483207	-0.650334	-0.644869	-0.333773	-0.461503	-0.607005	-0.43888	-0.482421	-0.472416	-0.353842	-0.253538	-0.223347	-0.298076	0.145145	-0.197717	-0.160445	-0.183742	0.073695	0.0444055	0.316172	-0.138069	0.0926572	-0.0841214	-0.07782	-0.0314638	0.374936	0.240133	0.437425	0.35492	0.400134	0.504408	0.467358	0.40741	0.452975	0.399372	0.394289	0.54045	0.491438	0.585865	0.466738	0.168017	0.500222	0.627265
L-HDL-C_%	-0.660921	-0.667486	-0.623811	-0.582012	-0.735572	-0.58176	-0.548379	-0.68086	-0.675499	-0.440899	-0.398366	-0.548399	-0.375347	-0.434762	-0.424289	-0.429779	-0.328327	-0.29895	-0.287018	0.115323	-0.265521	-0.242224	-0.250191	0.0814743	-0.0336067	0.251763	-0.20146	0.0179168	-0.1558	-0.140557	-0.10212	0.322805	0.256122	0.435029	0.250114	0.245559	0.416756	0.409142	0.404327	0.403819	0.398881	0.321977	0.496228	0.487654	0.52342	0.395785	0.271595	0.501679	0.612779
L-HDL-C	-0.675112	-0.67355	-0.633076	-0.596933	-0.746688	-0.596741	-0.557091	-0.693755	-0.688495	-0.436268	-0.414343	-0.564125	-0.391615	-0.451945	-0.441564	-0.440828	-0.341736	-0.312496	-0.304618	0.106431	-0.280691	-0.253867	-0.265337	0.0729394	-0.0481624	0.253336	-0.210968	0.0033705	-0.165923	-0.149413	-0.111724	0.317969	0.23709	0.42233	0.239936	0.241598	0.41012	0.398589	0.387157	0.394939	0.381861	0.313485	0.488044	0.471609	0.511951	0.388191	0.260785	0.496954	0.599384
M-LDL-L	-0.827472	-0.238095	-0.418813	-0.787529	-0.544905	-0.784114	-0.606279	-0.688517	-0.683286	0.0464803	-0.742778	-0.54485	-0.723148	-0.694662	-0.687201	-0.445245	-0.417976	-0.385868	-0.311335	-0.347271	-0.244119	-0.107773	-0.230091	-0.215862	-0.0790518	-0.154423	0.172407	-0.0419519	0.185309	0.244898	0.250132	-0.0939902	0.154844	0.0203671	0.380533	0.28397	0.08828	0.104491	0.303512	0.193984	0.331304	0.482627	0.112861	0.402482	0.401096	0.550639	0.202479	0.109565	0.543565
M-HDL-C_%	-0.716338	-0.723139	-0.639117	-0.645716	-0.760646	-0.645379	-0.513205	-0.709086	-0.704437	-0.389168	-0.48309	-0.677557	-0.462505	-0.52382	-0.514221	-0.407692	-0.324033	-0.296564	-0.393934	0.156461	-0.29726	-0.243582	-0.283796	0.0660868	-0.0526512	0.365256	-0.251902	-0.00402376	-0.198816	-0.191931	-0.146729	0.403421	0.139054	0.406229	0.242585	0.330072	0.48718	0.439652	0.308737	0.403765	0.297369	0.29188	0.524905	0.394028	0.502029	0.367986	0.134406	0.508858	0.536504
M-HDL-C	-0.722897	-0.735182	-0.649772	-0.652704	-0.773268	-0.652545	-0.518987	-0.720675	-0.716173	-0.396576	-0.487479	-0.689591	-0.467259	-0.531666	-0.522132	-0.419201	-0.338568	-0.311527	-0.410235	0.153088	-0.316073	-0.260306	-0.302764	0.062486	-0.0713114	0.368714	-0.270505	-0.0226443	-0.218025	-0.210403	-0.165883	0.402954	0.120054	0.396978	0.221566	0.314056	0.478623	0.429051	0.289986	0.39319	0.278144	0.275206	0.516887	0.375639	0.48568	0.351992	0.129493	0.507427	0.519935
superficial SAT	-0.799537	-0.575271	-0.764966	-0.727607	-0.762794	-0.727754	-0.618213	-0.700615	-0.697194	-0.103793	-0.634283	-0.706124	-0.618526	-0.661781	-0.654473	-0.539453	-0.369809	-0.342385	-0.465474	-0.102881	-0.322953	-0.42266	-0.306651	-0.058191	-0.106833	0.245208	-0.197925	-0.0601532	-0.169117	-0.133617	-0.114411	0.0681389	-0.0913154	0.158415	0.257861	0.334549	0.293343	0.109995	0.0775729	0.310962	0.0769526	0.265911	0.284395	0.167836	0.349031	0.341604	-0.178426	0.370163	0.324725
S-VLDL-PL_%	-0.45636	-0.903197	-0.688662	-0.362421	-0.803966	-0.365314	-0.49033	-0.605204	-0.602093	-0.768003	-0.135279	-0.522223	-0.117905	-0.23672	-0.227099	-0.466959	-0.296991	-0.280665	-0.408719	0.422607	-0.369247	-0.40559	-0.353122	0.364013	-0.150874	0.477188	-0.505998	-0.0991001	-0.440224	-0.470118	-0.409416	0.684706	0.126098	0.562968	-0.0276365	0.103299	0.528942	0.587688	0.247726	0.460563	0.224323	-0.0767804	0.606052	0.304439	0.338601	-0.0094285	0.218958	0.724624	0.37972
L-HDL-L	-0.75655	-0.717546	-0.683888	-0.68602	-0.813828	-0.686354	-0.595602	-0.774056	-0.769635	-0.410642	-0.507559	-0.667525	-0.487314	-0.556105	-0.546483	-0.503752	-0.429172	-0.401646	-0.423508	0.052499	-0.386057	-0.329226	-0.371559	0.0140475	-0.151426	0.2677	-0.285322	-0.101054	-0.24512	-0.22034	-0.188339	0.293196	0.100743	0.332276	0.152955	0.201621	0.358189	0.321916	0.260888	0.326154	0.25517	0.247681	0.427041	0.351128	0.425144	0.327225	0.192471	0.457394	0.496988
XS-VLDL-CE_%	-0.844113	-0.230922	-0.344958	-0.839688	-0.541903	-0.836743	-0.574699	-0.796352	-0.791967	0.0703727	-0.745034	-0.55148	-0.727758	-0.720014	-0.712921	-0.433753	-0.591477	-0.562433	-0.345634	-0.424734	-0.4082	-0.0823138	-0.401583	-0.200714	-0.261642	-0.262755	0.0758539	-0.231081	0.0797966	0.148151	0.145234	-0.139431	0.0706593	-0.0834981	0.218233	0.1387	-0.0871474	-0.0318898	0.204414	0.0247671	0.232946	0.435585	-0.00040427	0.304209	0.272905	0.504401	0.37485	-0.0165744	0.470085
XS-VLDL-CE	-0.86936	-0.262873	-0.379579	-0.863902	-0.577399	-0.861321	-0.598026	-0.825097	-0.821015	0.0550951	-0.767524	-0.588544	-0.750985	-0.749151	-0.742209	-0.465385	-0.621968	-0.593656	-0.391027	-0.429641	-0.448676	-0.124933	-0.441843	-0.213317	-0.299592	-0.242966	0.0340137	-0.268335	0.0372906	0.107113	0.103242	-0.138199	0.0251165	-0.101282	0.179747	0.115448	-0.0932144	-0.0477687	0.161995	0.00762319	0.189659	0.398115	-0.00896454	0.263572	0.241372	0.469193	0.346594	-0.011508	0.433527
M-HDL-L	-0.75657	-0.805945	-0.718811	-0.688193	-0.851439	-0.689255	-0.563803	-0.788528	-0.785053	-0.447666	-0.508533	-0.755643	-0.490918	-0.575214	-0.566199	-0.50228	-0.433946	-0.410136	-0.516464	0.129834	-0.439551	-0.376548	-0.426753	0.0508486	-0.198096	0.383466	-0.391462	-0.149138	-0.343113	-0.331622	-0.291542	0.398271	-0.0061714	0.333109	0.0792854	0.202282	0.415598	0.358072	0.162424	0.323181	0.148398	0.149855	0.457697	0.249391	0.366132	0.230436	0.0952029	0.499611	0.401016
L-LDL-FC	-0.896496	-0.518352	-0.629673	-0.846342	-0.775144	-0.845548	-0.714281	-0.859063	-0.855017	-0.176261	-0.725276	-0.691288	-0.707161	-0.740711	-0.732493	-0.598831	-0.585696	-0.557193	-0.501229	-0.235935	-0.477526	-0.330419	-0.462737	-0.105346	-0.281789	0.00933273	-0.150227	-0.236266	-0.128491	-0.0775426	-0.0641507	0.0522245	-0.00619164	0.0745527	0.155164	0.157151	0.122622	0.118514	0.152595	0.171591	0.168436	0.261607	0.182413	0.256431	0.285879	0.34365	0.185034	0.253808	0.415563
3-hydroxybutyrate	-0.648018	-0.697429	-0.522262	-0.639041	-0.698104	-0.640171	-0.304039	-0.766942	-0.764618	-0.232027	-0.413721	-0.711165	-0.400657	-0.499321	-0.491518	-0.314887	-0.46406	-0.444439	-0.42007	0.0549433	-0.475624	-0.227467	-0.477723	0.0835724	-0.260036	0.260025	-0.414275	-0.22803	-0.375472	-0.362713	-0.331316	0.307702	-0.110244	0.198765	-0.00179901	0.170021	0.207005	0.130644	0.0342405	0.163037	0.0118737	0.225689	0.292599	0.107656	0.278041	0.294068	0.196444	0.276497	0.299064
S-LDL-L	-0.922743	-0.387605	-0.571093	-0.879165	-0.713576	-0.87766	-0.7289	-0.834092	-0.830225	-0.0597055	-0.807074	-0.677844	-0.790465	-0.79629	-0.789165	-0.609819	-0.590281	-0.561926	-0.509025	-0.371191	-0.457987	-0.311735	-0.44286	-0.211866	-0.28705	-0.109872	-0.0339755	-0.245949	-0.02387	0.0409121	0.0425346	-0.0739416	-0.0362476	-0.0538585	0.173485	0.136679	0.0218256	0.0306099	0.11823	0.116081	0.143619	0.282888	0.0596394	0.224147	0.232641	0.361364	0.147634	0.142837	0.378917
XS-VLDL-C_%	-0.90788	-0.334654	-0.459724	-0.893705	-0.648394	-0.891706	-0.643326	-0.860477	-0.85674	0.0142673	-0.797313	-0.656604	-0.781358	-0.78899	-0.782046	-0.52491	-0.643145	-0.6155	-0.465553	-0.408718	-0.492408	-0.207601	-0.483806	-0.211009	-0.332442	-0.182077	-0.0298776	-0.298206	-0.0234062	0.0441779	0.0428933	-0.104019	-0.0367328	-0.0991648	0.144177	0.108253	-0.0624192	-0.0371568	0.10994	0.0221196	0.134945	0.337762	0.00645919	0.214369	0.21277	0.413155	0.272806	0.0332259	0.388231
L-LDL-FC_%	-0.899587	-0.570896	-0.668536	-0.845268	-0.810257	-0.844854	-0.718968	-0.868247	-0.864477	-0.207502	-0.720778	-0.729136	-0.703139	-0.744719	-0.736464	-0.618441	-0.583129	-0.555693	-0.539331	-0.195009	-0.49685	-0.372348	-0.481525	-0.0775252	-0.294235	0.0596381	-0.196782	-0.247524	-0.169836	-0.125681	-0.107264	0.106761	-0.042558	0.0918861	0.131661	0.159877	0.156046	0.144575	0.121517	0.189311	0.133884	0.216976	0.20336	0.224785	0.268481	0.30043	0.142378	0.289432	0.385238
XS-VLDL-C	-0.912589	-0.336756	-0.460875	-0.900203	-0.653172	-0.898365	-0.647316	-0.871111	-0.86753	0.00971508	-0.801716	-0.661004	-0.786243	-0.796009	-0.789205	-0.5317	-0.662687	-0.635568	-0.477124	-0.420957	-0.512855	-0.217128	-0.504722	-0.225478	-0.355468	-0.188064	-0.0451889	-0.321694	-0.0409318	0.0290685	0.0255628	-0.117542	-0.0529014	-0.115901	0.117728	0.0820682	-0.0814001	-0.0558304	0.0917578	-0.000186131	0.116944	0.323143	-0.00762176	0.196391	0.192878	0.398789	0.27751	0.0224092	0.371329
L-HDL-FC	-0.831347	-0.730265	-0.744501	-0.767382	-0.871618	-0.768464	-0.661991	-0.847436	-0.844083	-0.37364	-0.599381	-0.747121	-0.58236	-0.658551	-0.650032	-0.589305	-0.539237	-0.514285	-0.538696	-0.0363609	-0.505958	-0.434641	-0.491853	-0.0613836	-0.281528	0.255157	-0.367732	-0.232362	-0.336797	-0.300554	-0.278386	0.20559	-0.053891	0.210639	0.041585	0.116506	0.265482	0.196654	0.107691	0.214801	0.104125	0.15037	0.328403	0.202846	0.292503	0.233738	0.106666	0.394198	0.360973
L-HDL-FC_%	-0.836478	-0.7295	-0.748414	-0.773076	-0.874774	-0.774213	-0.666853	-0.852108	-0.848842	-0.369552	-0.606308	-0.752194	-0.589557	-0.666083	-0.657662	-0.595478	-0.547389	-0.522653	-0.546805	-0.0443524	-0.514563	-0.442485	-0.500505	-0.0680605	-0.291328	0.253061	-0.373048	-0.242314	-0.342967	-0.305742	-0.284465	0.197	-0.0658113	0.200217	0.0331487	0.109377	0.257194	0.185782	0.0956261	0.205431	0.092297	0.143002	0.319671	0.191092	0.281607	0.226564	0.099553	0.388243	0.349995
HDL diameter	-0.801631	-0.708164	-0.632904	-0.770382	-0.817032	-0.771452	-0.563031	-0.880044	-0.877203	-0.347328	-0.567144	-0.732606	-0.551894	-0.639802	-0.631795	-0.493928	-0.611163	-0.588731	-0.511028	-0.0476192	-0.573804	-0.342661	-0.56751	-0.0754822	-0.362207	0.222443	-0.427947	-0.320926	-0.403427	-0.362977	-0.346336	0.185482	-0.0793666	0.167258	-0.053774	0.0384542	0.180795	0.11734	0.0688206	0.0810642	0.0619583	0.162001	0.281255	0.160017	0.240406	0.241786	0.242283	0.278652	0.33558
S-VLDL-PL	-0.661815	-0.883131	-0.739865	-0.589339	-0.899268	-0.592369	-0.620293	-0.800836	-0.798614	-0.650697	-0.371546	-0.675598	-0.356885	-0.474895	-0.466271	-0.600093	-0.533602	-0.517183	-0.586247	0.195828	-0.579999	-0.496474	-0.565782	0.2027	-0.369143	0.356912	-0.556734	-0.319342	-0.508828	-0.507983	-0.46654	0.505718	-0.0672138	0.336695	-0.149531	-0.00374014	0.332619	0.373736	0.0677825	0.269549	0.0545257	-0.11682	0.420721	0.143523	0.182912	-0.0383845	0.203433	0.563863	0.259177
IDL-CE_%	-0.666964	0.330979	0.118756	-0.749536	-0.080447	-0.745097	-0.295774	-0.5181	-0.517128	0.581161	-0.819257	-0.338353	-0.818257	-0.739029	-0.740415	-0.170691	-0.553575	-0.539166	-0.256184	-0.787465	-0.342221	0.148511	-0.348586	-0.624841	-0.348871	-0.544856	0.287024	-0.358434	0.228356	0.342837	0.279913	-0.651683	-0.199604	-0.611435	0.0523355	-0.0295854	-0.531506	-0.547033	-0.140438	-0.470237	-0.0936397	0.381724	-0.492536	-0.0701867	-0.0941526	0.410925	0.211686	-0.631165	0.0626671
L-HDL-P	-0.659797	-0.912769	-0.7317	-0.606056	-0.882489	-0.609324	-0.515444	-0.794863	-0.79331	-0.587177	-0.38089	-0.738812	-0.36872	-0.498225	-0.490652	-0.497041	-0.517754	-0.503123	-0.57405	0.229183	-0.585392	-0.46913	-0.576835	0.0850876	-0.365429	0.49081	-0.655277	-0.321141	-0.612886	-0.606885	-0.571547	0.447391	-0.150503	0.32322	-0.191568	0.00806051	0.362685	0.283328	-0.0116139	0.168989	-0.0361177	-0.0812573	0.443399	0.0609861	0.181315	-0.00535174	0.109301	0.484972	0.201484
Hip circumference	-0.872016	-0.373576	-0.570152	-0.837558	-0.647476	-0.837003	-0.621405	-0.697238	-0.695913	0.0345441	-0.855481	-0.763677	-0.848921	-0.851504	-0.84899	-0.497355	-0.482443	-0.463493	-0.633443	-0.303258	-0.435371	-0.339969	-0.421991	-0.391917	-0.288001	0.165248	-0.16088	-0.258213	-0.165406	-0.0969311	-0.110376	-0.132069	-0.307337	-0.164048	0.0718124	0.20142	0.0991337	-0.0609436	-0.157047	0.00997007	-0.141821	0.12138	0.0806454	-0.0671511	0.0792021	0.188692	-0.271652	0.0914432	0.0697224
XL-HDL-P	-0.859639	-0.558015	-0.548222	-0.863167	-0.750076	-0.863952	-0.529425	-0.911359	-0.909633	-0.137557	-0.69383	-0.759078	-0.683443	-0.755046	-0.749331	-0.488537	-0.709394	-0.68921	-0.553962	-0.277461	-0.647833	-0.329681	-0.647103	-0.277058	-0.471296	0.0706245	-0.383104	-0.441286	-0.385618	-0.31323	-0.324177	-0.0607032	-0.236387	-0.0839355	-0.138363	-0.0505127	-0.0518668	-0.152959	-0.0971977	-0.126084	-0.0969414	0.180963	0.0475829	-0.00310355	0.0987379	0.256475	0.199244	0.0329945	0.196201
IDL-PL_%	-0.722525	-0.901556	-0.890877	-0.63735	-0.945536	-0.640954	-0.660685	-0.765644	-0.764549	-0.500853	-0.483668	-0.790612	-0.473089	-0.587739	-0.580906	-0.673936	-0.475455	-0.460824	-0.693872	0.171035	-0.560021	-0.651332	-0.542204	0.128198	-0.343586	0.491295	-0.597356	-0.29307	-0.549288	-0.549775	-0.509915	0.431676	-0.272306	0.258876	-0.109427	0.118513	0.387551	0.290141	-0.116814	0.284919	-0.134296	-0.182225	0.392776	-0.040068	0.126586	-0.102916	-0.193764	0.58788	0.0834114
XS-VLDL-L	-0.971222	-0.462763	-0.579686	-0.959044	-0.772261	-0.959	-0.706798	-0.955621	-0.953714	-0.0602234	-0.854309	-0.787318	-0.843458	-0.881967	-0.876394	-0.636165	-0.773446	-0.751676	-0.656527	-0.417299	-0.678218	-0.38883	-0.670354	-0.270823	-0.52038	-0.0853779	-0.24601	-0.486378	-0.246449	-0.172602	-0.181559	-0.105237	-0.263777	-0.194401	-0.0784318	-0.0333832	-0.113639	-0.133929	-0.115359	-0.0953573	-0.0959242	0.129689	-0.0487416	-0.0093213	0.0309034	0.210797	0.146546	0.033592	0.174853
IDL-PL	-0.827503	-0.84206	-0.863571	-0.75835	-0.955462	-0.761348	-0.710166	-0.857731	-0.856464	-0.419714	-0.607037	-0.830238	-0.59629	-0.700756	-0.694156	-0.698597	-0.585061	-0.567979	-0.725625	0.0279643	-0.628152	-0.621764	-0.612179	0.0144842	-0.415275	0.390822	-0.561403	-0.366598	-0.527157	-0.503738	-0.478302	0.297459	-0.295168	0.153549	-0.119204	0.0854675	0.277546	0.176257	-0.134855	0.186118	-0.144441	-0.114997	0.303553	-0.0466769	0.107769	-0.0309656	-0.125761	0.470929	0.0990466
HDL2 cholesterol	-0.712701	-0.881703	-0.694165	-0.677391	-0.869927	-0.680397	-0.477732	-0.828731	-0.827708	-0.495697	-0.467999	-0.80822	-0.458117	-0.581458	-0.574898	-0.479469	-0.554755	-0.540969	-0.628346	0.148399	-0.624301	-0.449635	-0.619315	-0.0214318	-0.408288	0.468047	-0.644162	-0.369655	-0.610338	-0.592027	-0.565946	0.386262	-0.23895	0.216427	-0.224386	0.00137693	0.295747	0.19571	-0.0924782	0.0947234	-0.117188	-0.0588608	0.365377	-0.0165062	0.13774	0.0169398	0.0692632	0.386844	0.144156
FAw3/FA ratio	-0.567439	-0.633425	-0.657399	-0.542223	-0.618573	-0.545048	-0.210749	-0.530245	-0.531392	-0.0289604	-0.466186	-0.829289	-0.465319	-0.544151	-0.541415	-0.326086	-0.271797	-0.264414	-0.560977	0.0110791	-0.38428	-0.495735	-0.386304	-0.188762	-0.212051	0.482001	-0.474883	-0.190646	-0.445976	-0.440899	-0.420647	0.121003	-0.493167	-0.0285837	-0.102257	0.110426	0.238139	-0.0678023	-0.348947	0.0544748	-0.3861	-0.00657308	0.146137	-0.295471	0.0283021	0.0452528	-0.538314	0.200731	-0.118858
XS-VLDL-FC	-0.948961	-0.652429	-0.784709	-0.897979	-0.911424	-0.900092	-0.780113	-0.927097	-0.926314	-0.256005	-0.803725	-0.883036	-0.795225	-0.860206	-0.854945	-0.756817	-0.719587	-0.702419	-0.794759	-0.271017	-0.710775	-0.624161	-0.696651	-0.23424	-0.535908	0.139252	-0.419777	-0.493953	-0.409544	-0.352919	-0.352047	0.0278647	-0.382167	-0.122954	-0.186514	-0.0851473	0.0294336	-0.0425888	-0.225435	-0.00565564	-0.217496	-0.0927232	0.0418147	-0.124972	-0.0459016	-0.00801662	-0.0963462	0.221439	0.0363509
IDL-CE	-0.818123	0.119032	-0.0944647	-0.882875	-0.299931	-0.879805	-0.443286	-0.689639	-0.689037	0.459144	-0.920298	-0.527818	-0.918775	-0.871101	-0.871489	-0.340962	-0.680883	-0.665603	-0.446711	-0.758541	-0.504393	-0.0430015	-0.507424	-0.605959	-0.471044	-0.430037	0.110224	-0.470621	0.05998	0.174169	0.117889	-0.565603	-0.321001	-0.591405	-0.037477	-0.0585901	-0.476816	-0.518481	-0.232189	-0.442528	-0.190587	0.27589	-0.440157	-0.147249	-0.131758	0.321862	0.131911	-0.511522	0.0114942
FAw6/FA ratio	-0.961579	-0.570632	-0.772727	-0.919857	-0.883598	-0.921851	-0.847236	-0.945429	-0.94473	-0.175473	-0.82918	-0.801105	-0.821528	-0.8854	-0.880763	-0.797765	-0.79755	-0.78057	-0.774674	-0.352066	-0.751365	-0.624439	-0.736099	-0.207321	-0.600786	0.0413504	-0.415787	-0.559539	-0.414828	-0.348824	-0.356513	-0.0790123	-0.40194	-0.179403	-0.187568	-0.080866	-0.0707388	-0.12838	-0.26154	-0.079075	-0.243813	-0.11366	-0.0195655	-0.159936	-0.0976171	-0.0298251	-0.0730321	0.176945	-0.00708674
L-LDL-L	-0.996379	-0.377504	-0.581094	-0.992892	-0.737151	-0.993093	-0.728085	-0.924076	-0.923542	0.0742827	-0.949923	-0.814301	-0.944523	-0.970419	-0.967398	-0.670249	-0.794134	-0.776657	-0.741537	-0.521619	-0.71027	-0.451752	-0.702129	-0.388781	-0.583503	-0.0938696	-0.250569	-0.555602	-0.26491	-0.179693	-0.202812	-0.240126	-0.435707	-0.357596	-0.13576	-0.0525845	-0.199751	-0.275865	-0.293425	-0.205429	-0.269196	0.0366388	-0.173068	-0.189669	-0.108388	0.113315	-0.0542475	-0.0655567	-0.0118115
Acetoacetate	-0.755172	-0.808419	-0.806403	-0.712593	-0.883618	-0.716072	-0.548723	-0.805305	-0.805537	-0.264683	-0.565553	-0.871646	-0.559878	-0.67282	-0.667759	-0.596272	-0.550993	-0.539343	-0.722095	0.0314583	-0.639414	-0.609813	-0.630465	0.0293631	-0.441146	0.412575	-0.621794	-0.402709	-0.586181	-0.574926	-0.547938	0.271591	-0.46024	0.0600884	-0.18697	0.0864953	0.214836	0.0421755	-0.306904	0.0979199	-0.325872	-0.151557	0.210133	-0.230677	-0.00370122	-0.076188	-0.250197	0.354066	-0.0643694
TNFa response to C. Albicans	-0.541045	-0.769537	-0.816473	-0.466365	-0.852213	-0.471112	-0.652412	-0.642672	-0.643	-0.525209	-0.313748	-0.618421	-0.308381	-0.432211	-0.427481	-0.680143	-0.469436	-0.461068	-0.678476	0.0994821	-0.571273	-0.703543	-0.55341	0.349686	-0.413698	0.368828	-0.611061	-0.36873	-0.582472	-0.576286	-0.55384	0.350457	-0.327555	0.149566	-0.228803	-0.00795888	0.190969	0.128502	-0.223568	0.324978	-0.235961	-0.354661	0.229484	-0.167745	-0.065347	-0.288782	-0.17091	0.516027	-0.0891628
red cell distribution width (RDW)	-0.886292	-0.350858	-0.713405	-0.838416	-0.769535	-0.839795	-0.854187	-0.775093	-0.774778	0.00354367	-0.837146	-0.680355	-0.832613	-0.856355	-0.854036	-0.805813	-0.673018	-0.656901	-0.71041	-0.480306	-0.615207	-0.630664	-0.593827	-0.277414	-0.508616	-0.0886175	-0.228891	-0.472359	-0.24845	-0.165513	-0.193579	-0.272038	-0.434941	-0.309019	-0.108803	-0.0389942	-0.174515	-0.281332	-0.316005	-0.0631406	-0.283983	-0.114825	-0.184969	-0.224059	-0.159818	-0.0434171	-0.219346	0.0567402	-0.109199
PUFA/FA ratio	-0.955192	-0.608695	-0.799928	-0.914719	-0.89601	-0.917148	-0.80541	-0.936486	-0.936329	-0.165978	-0.826258	-0.854875	-0.820186	-0.890624	-0.88638	-0.785807	-0.776462	-0.761176	-0.807299	-0.32949	-0.757762	-0.660765	-0.74416	-0.226993	-0.601684	0.103392	-0.461337	-0.561965	-0.458423	-0.396401	-0.402574	-0.0625399	-0.468917	-0.193333	-0.218328	-0.084525	-0.0505399	-0.146797	-0.322832	-0.0853143	-0.311769	-0.138746	-0.0216367	-0.223637	-0.121946	-0.0556178	-0.161625	0.176203	-0.0612852
XS-VLDL-FC_%	-0.870978	-0.728107	-0.860733	-0.800621	-0.938205	-0.803997	-0.771951	-0.848297	-0.848413	-0.353913	-0.72059	-0.889257	-0.714576	-0.792785	-0.78821	-0.785563	-0.64186	-0.629289	-0.837505	-0.162049	-0.691811	-0.736657	-0.674856	-0.190125	-0.519806	0.270024	-0.507505	-0.476191	-0.490821	-0.449995	-0.442551	0.113758	-0.448165	-0.0794352	-0.250915	-0.113423	0.110076	0.0117602	-0.296914	0.0445679	-0.296862	-0.239709	0.0862292	-0.207152	-0.106402	-0.158694	-0.252509	0.319714	-0.0706232
LA/FA ratio	-0.963479	-0.395411	-0.703777	-0.9354	-0.781131	-0.936756	-0.836606	-0.892523	-0.892413	0.0237547	-0.901155	-0.764067	-0.896594	-0.932818	-0.929903	-0.788041	-0.796649	-0.781022	-0.762019	-0.510319	-0.723857	-0.606677	-0.709772	-0.2928	-0.60973	-0.087461	-0.302983	-0.575568	-0.31544	-0.237477	-0.258456	-0.259486	-0.477733	-0.343632	-0.162059	-0.0834393	-0.202756	-0.281384	-0.347667	-0.166342	-0.320806	-0.0974718	-0.182505	-0.247716	-0.184229	-0.0205392	-0.172525	0.033157	-0.0964558
Estimated degree of unsaturation	-0.874939	-0.760777	-0.853391	-0.821322	-0.959569	-0.825111	-0.782321	-0.922824	-0.923099	-0.377445	-0.692742	-0.862584	-0.68689	-0.78807	-0.78325	-0.789184	-0.753079	-0.741498	-0.834372	-0.154632	-0.791298	-0.725293	-0.777145	-0.120185	-0.623307	0.240498	-0.61185	-0.58016	-0.597215	-0.554588	-0.548428	0.119647	-0.463429	-0.0715484	-0.327556	-0.155644	0.0487171	-0.0245742	-0.323788	-0.0348221	-0.323814	-0.270446	0.0909515	-0.233451	-0.145397	-0.187216	-0.13382	0.303063	-0.0876955
Citrate	-0.73751	-0.498847	-0.426865	-0.769385	-0.577406	-0.770273	-0.24868	-0.724462	-0.725674	0.113561	-0.695157	-0.881457	-0.695673	-0.754759	-0.753126	-0.290441	-0.522592	-0.514311	-0.6575	-0.182653	-0.572543	-0.27773	-0.580713	-0.265543	-0.425101	0.265281	-0.403962	-0.414182	-0.390917	-0.359076	-0.353862	0.0554004	-0.536841	-0.225079	-0.169168	0.0897855	0.0318822	-0.162828	-0.390579	-0.14636	-0.407024	0.0487506	-0.00563961	-0.320588	-0.0619039	0.106479	-0.233745	-0.0311487	-0.118664
HDL cholesterol	-0.691948	-0.897872	-0.722115	-0.661956	-0.890203	-0.666281	-0.498621	-0.829318	-0.829915	-0.516683	-0.465094	-0.822844	-0.46038	-0.597927	-0.593162	-0.536001	-0.619685	-0.612415	-0.724879	0.130163	-0.726946	-0.557712	-0.722208	-0.0483725	-0.537534	0.488155	-0.764439	-0.502561	-0.739434	-0.718632	-0.700986	0.355665	-0.401259	0.118933	-0.394567	-0.12033	0.215369	0.100688	-0.270695	-0.016371	-0.295743	-0.243915	0.280433	-0.201153	-0.0389854	-0.170875	-0.0220621	0.348977	-0.0525872
IDL-C	-0.94781	-0.19028	-0.387562	-0.984252	-0.581747	-0.983728	-0.608886	-0.870167	-0.870518	0.242041	-0.971748	-0.745079	-0.970813	-0.975997	-0.975314	-0.558531	-0.818464	-0.804862	-0.69	-0.660121	-0.713518	-0.330667	-0.712271	-0.533815	-0.634061	-0.234024	-0.176979	-0.620822	-0.213677	-0.108844	-0.153408	-0.410003	-0.497851	-0.536263	-0.205921	-0.13463	-0.386399	-0.463491	-0.380584	-0.397507	-0.350423	0.0640782	-0.352467	-0.28439	-0.215975	0.128611	-0.00153789	-0.311997	-0.104718
IDL-L	-0.98156	-0.453367	-0.606248	-0.985931	-0.781234	-0.98731	-0.705848	-0.953184	-0.953694	0.00711643	-0.921462	-0.854002	-0.919027	-0.968146	-0.965889	-0.685758	-0.846007	-0.832642	-0.80888	-0.490295	-0.800638	-0.516273	-0.794822	-0.399014	-0.676683	-0.0331879	-0.385771	-0.651051	-0.404626	-0.31751	-0.345168	-0.211242	-0.538471	-0.384562	-0.278449	-0.142886	-0.23117	-0.325511	-0.402367	-0.274512	-0.384566	-0.0714979	-0.194981	-0.302761	-0.199545	0.00512588	-0.0695816	-0.0792243	-0.12091
IDL-C_%	-0.930668	-0.139133	-0.348348	-0.973187	-0.539684	-0.972308	-0.584955	-0.839472	-0.839896	0.295168	-0.974758	-0.720202	-0.974491	-0.971679	-0.971512	-0.528364	-0.798965	-0.785751	-0.664906	-0.677172	-0.687763	-0.297529	-0.686899	-0.547672	-0.617849	-0.25278	-0.145	-0.60725	-0.18459	-0.0782731	-0.125447	-0.443678	-0.501064	-0.559268	-0.187274	-0.115358	-0.403266	-0.491673	-0.387693	-0.418644	-0.355751	0.0803442	-0.37686	-0.293811	-0.223116	0.141607	-0.0137786	-0.355521	-0.117082
XL-VLDL-CE_%	-0.81676	-0.508397	-0.722707	-0.767204	-0.843459	-0.770533	-0.936665	-0.880382	-0.880627	-0.347343	-0.671565	-0.600763	-0.666598	-0.740539	-0.736853	-0.885419	-0.868203	-0.858393	-0.766187	-0.346554	-0.826493	-0.698355	-0.80728	-0.075418	-0.737108	-0.083568	-0.472607	-0.696195	-0.480855	-0.419102	-0.433096	-0.074106	-0.385609	-0.204099	-0.372723	-0.31478	-0.208085	-0.142087	-0.29987	-0.152084	-0.270472	-0.371433	-0.107168	-0.213371	-0.296573	-0.295902	0.0778029	0.185791	-0.126562
S-VLDL-L	-0.915743	-0.573439	-0.626315	-0.916067	-0.837094	-0.918603	-0.710444	-0.997382	-0.997945	-0.18862	-0.781052	-0.813178	-0.777303	-0.860455	-0.856779	-0.709335	-0.907771	-0.896567	-0.804944	-0.373027	-0.884188	-0.549541	-0.879452	-0.228424	-0.755223	-0.01828	-0.515317	-0.725767	-0.523171	-0.452915	-0.468359	-0.0559062	-0.490257	-0.278619	-0.393262	-0.255505	-0.218007	-0.234128	-0.367923	-0.255987	-0.355536	-0.174069	-0.127943	-0.273361	-0.228979	-0.0950659	0.109098	0.0237015	-0.100069
XL-VLDL-CE	-0.826584	-0.510988	-0.713556	-0.781539	-0.843748	-0.784824	-0.925817	-0.894625	-0.8949	-0.337807	-0.68154	-0.612524	-0.676693	-0.751795	-0.748127	-0.876677	-0.881506	-0.871641	-0.770789	-0.354039	-0.838681	-0.687245	-0.820579	-0.0870824	-0.747871	-0.0863853	-0.478423	-0.70784	-0.487513	-0.424022	-0.438939	-0.0773484	-0.393429	-0.213542	-0.380425	-0.317036	-0.21745	-0.153326	-0.306238	-0.167583	-0.277416	-0.36051	-0.112941	-0.218836	-0.296674	-0.284537	0.0907064	0.170558	-0.126054
S-VLDL-CE	-0.944587	-0.423318	-0.549644	-0.960168	-0.754276	-0.961714	-0.700564	-0.979639	-0.980226	-0.0165083	-0.864282	-0.789141	-0.861687	-0.918347	-0.915682	-0.684405	-0.920069	-0.90803	-0.775262	-0.516076	-0.858141	-0.49139	-0.854894	-0.329697	-0.752058	-0.142204	-0.398664	-0.72818	-0.418505	-0.33356	-0.361036	-0.215456	-0.512546	-0.402964	-0.34559	-0.242231	-0.326399	-0.353693	-0.394433	-0.334328	-0.373181	-0.101844	-0.246549	-0.297258	-0.258083	-0.0267093	0.0866399	-0.114807	-0.117641
S-VLDL-CE_%	-0.945325	-0.405202	-0.538902	-0.962799	-0.742719	-0.964229	-0.697014	-0.975367	-0.975961	0.00341539	-0.871442	-0.784408	-0.869003	-0.92259	-0.920051	-0.679419	-0.919574	-0.907494	-0.77005	-0.531031	-0.853538	-0.483081	-0.85051	-0.340311	-0.750404	-0.156144	-0.3848	-0.727275	-0.405965	-0.319583	-0.348363	-0.23282	-0.514284	-0.416453	-0.339956	-0.240394	-0.338399	-0.366759	-0.397	-0.343094	-0.374812	-0.0935585	-0.25974	-0.299805	-0.261171	-0.0190728	0.0844723	-0.130791	-0.11982
S-VLDL-C	-0.937103	-0.470818	-0.575177	-0.948745	-0.781864	-0.950686	-0.703835	-0.987882	-0.988575	-0.0691817	-0.841285	-0.801567	-0.838691	-0.904392	-0.901527	-0.695585	-0.922753	-0.911357	-0.792561	-0.477058	-0.874911	-0.516747	-0.871425	-0.304987	-0.76314	-0.104042	-0.442338	-0.737882	-0.45931	-0.378212	-0.402828	-0.171467	-0.518344	-0.374604	-0.373027	-0.257202	-0.30097	-0.326724	-0.399509	-0.319904	-0.381146	-0.133864	-0.218427	-0.303267	-0.261405	-0.0575689	0.0876384	-0.0777562	-0.124999
S-VLDL-C_%	-0.939173	-0.456665	-0.568831	-0.95262	-0.773717	-0.954496	-0.701424	-0.984396	-0.985172	-0.049294	-0.850844	-0.802562	-0.848625	-0.911925	-0.909257	-0.693365	-0.923329	-0.912153	-0.794485	-0.490085	-0.87434	-0.51501	-0.871028	-0.315801	-0.765602	-0.112057	-0.434981	-0.741146	-0.453101	-0.370998	-0.396765	-0.18648	-0.529688	-0.390925	-0.372827	-0.256622	-0.311607	-0.341432	-0.411243	-0.330621	-0.392217	-0.13376	-0.232886	-0.315097	-0.271216	-0.0580518	0.0755411	-0.0933091	-0.136344
XL-VLDL-C_%	-0.856808	-0.475961	-0.647901	-0.835065	-0.813507	-0.838003	-0.867755	-0.936559	-0.937082	-0.25521	-0.726841	-0.642536	-0.723139	-0.796805	-0.793569	-0.829083	-0.934969	-0.925299	-0.775013	-0.420598	-0.880371	-0.627935	-0.867478	-0.153693	-0.793702	-0.13634	-0.474298	-0.759413	-0.490232	-0.41711	-0.439013	-0.134246	-0.435145	-0.289121	-0.411562	-0.339261	-0.294108	-0.238612	-0.346439	-0.257455	-0.318054	-0.308373	-0.177961	-0.256624	-0.317853	-0.232897	0.139385	0.0655124	-0.139932
XL-VLDL-C	-0.856783	-0.467784	-0.634979	-0.839233	-0.805203	-0.842168	-0.85644	-0.939157	-0.93981	-0.241587	-0.731292	-0.644552	-0.728089	-0.801743	-0.798698	-0.82119	-0.943794	-0.934592	-0.777783	-0.431176	-0.889259	-0.621119	-0.877276	-0.165176	-0.805579	-0.144054	-0.477278	-0.772606	-0.494698	-0.420308	-0.443656	-0.144614	-0.448716	-0.306225	-0.424373	-0.348717	-0.310395	-0.256004	-0.361231	-0.277806	-0.332907	-0.309785	-0.192971	-0.271777	-0.330671	-0.234911	0.142277	0.0459599	-0.15273
%Lymphocytes	-0.904654	-0.562066	-0.750178	-0.871645	-0.866716	-0.875015	-0.814651	-0.902754	-0.904146	-0.201993	-0.811742	-0.835642	-0.811004	-0.880232	-0.87798	-0.842104	-0.819488	-0.811015	-0.939273	-0.412115	-0.832339	-0.729105	-0.81986	-0.237012	-0.718175	0.0310196	-0.484773	-0.685081	-0.495784	-0.425696	-0.445129	-0.0765219	-0.58769	-0.345572	-0.37508	-0.236112	-0.194721	-0.226728	-0.46511	-0.145889	-0.449924	-0.317769	-0.16125	-0.374557	-0.308044	-0.241103	-0.185939	0.110602	-0.235912
IDL-FC	-0.91782	-0.630475	-0.746492	-0.903077	-0.878957	-0.906584	-0.717325	-0.944604	-0.946206	-0.163051	-0.806943	-0.893042	-0.806663	-0.895632	-0.893324	-0.748303	-0.837896	-0.82961	-0.885142	-0.333112	-0.864179	-0.681065	-0.856932	-0.283452	-0.729242	0.143871	-0.59351	-0.698896	-0.600799	-0.534723	-0.550708	-0.0706112	-0.633259	-0.298598	-0.409001	-0.208379	-0.140258	-0.265037	-0.500927	-0.235131	-0.496472	-0.263986	-0.109905	-0.410386	-0.275243	-0.185832	-0.185316	0.0751461	-0.240322
M-HDL-FC	-0.673145	-0.897554	-0.749459	-0.636501	-0.89759	-0.641523	-0.520932	-0.807495	-0.80905	-0.529011	-0.464574	-0.847174	-0.462657	-0.599798	-0.595854	-0.591084	-0.625548	-0.622277	-0.801231	0.117702	-0.762552	-0.645422	-0.75667	-0.0287926	-0.590254	0.480085	-0.788034	-0.55633	-0.76131	-0.748302	-0.728719	0.374549	-0.49421	0.0553338	-0.468798	-0.187554	0.184946	0.0878085	-0.368756	-0.0272503	-0.393063	-0.371376	0.218547	-0.303404	-0.152762	-0.300212	-0.11561	0.357246	-0.167252
XL-VLDL-FC_%	-0.847907	-0.300044	-0.402434	-0.88774	-0.629133	-0.88924	-0.637259	-0.930236	-0.931294	0.0192824	-0.784958	-0.635167	-0.784742	-0.839347	-0.837837	-0.615642	-0.96654	-0.958232	-0.689512	-0.566268	-0.877445	-0.39915	-0.878563	-0.336459	-0.816701	-0.263012	-0.387532	-0.801232	-0.421171	-0.329361	-0.368626	-0.304084	-0.493339	-0.466916	-0.427512	-0.348648	-0.464021	-0.444333	-0.412164	-0.477321	-0.385063	-0.132519	-0.333776	-0.325363	-0.33858	-0.0673324	0.227447	-0.226719	-0.163872
XL-VLDL-FC	-0.848355	-0.305257	-0.410815	-0.88672	-0.635696	-0.888325	-0.646485	-0.931324	-0.932451	0.0103023	-0.784815	-0.636368	-0.784774	-0.840462	-0.839004	-0.625864	-0.970361	-0.96235	-0.69812	-0.564573	-0.883795	-0.411599	-0.884502	-0.334057	-0.823905	-0.259385	-0.395738	-0.808088	-0.429477	-0.337826	-0.377184	-0.301784	-0.500336	-0.468146	-0.43632	-0.355494	-0.464389	-0.443778	-0.419769	-0.47784	-0.392498	-0.147638	-0.33465	-0.333085	-0.347903	-0.0822477	0.220619	-0.221016	-0.173585
Adiponectin	-0.916489	-0.604632	-0.69824	-0.904641	-0.865286	-0.907955	-0.753391	-0.960133	-0.961674	-0.212244	-0.809829	-0.855883	-0.809448	-0.894529	-0.89233	-0.75923	-0.88454	-0.877332	-0.891967	-0.340046	-0.898333	-0.651996	-0.890561	-0.277815	-0.778451	0.0900812	-0.584624	-0.748679	-0.594063	-0.526323	-0.543661	-0.0498324	-0.598023	-0.306107	-0.449847	-0.26116	-0.17099	-0.229384	-0.476842	-0.26825	-0.465929	-0.3067	-0.115128	-0.385961	-0.308653	-0.228971	-0.0839542	0.0630019	-0.231725
S-VLDL-FC	-0.793368	-0.777333	-0.731322	-0.770319	-0.914929	-0.774968	-0.666269	-0.930829	-0.932403	-0.431403	-0.605879	-0.832727	-0.604177	-0.726901	-0.723217	-0.720045	-0.821921	-0.816791	-0.860869	-0.130796	-0.893586	-0.677661	-0.887026	-0.0963924	-0.74968	0.22267	-0.719409	-0.716364	-0.712179	-0.669692	-0.669654	0.17497	-0.539863	-0.13127	-0.520544	-0.30517	-0.0552271	-0.0910214	-0.422716	-0.162528	-0.428	-0.373626	0.0156665	-0.343509	-0.2654	-0.296743	0.00619491	0.213892	-0.19608
XL-HDL-PL	-0.61509	-0.890906	-0.766943	-0.57702	-0.889007	-0.582468	-0.572499	-0.774869	-0.776279	-0.573448	-0.384486	-0.711589	-0.382459	-0.535317	-0.531815	-0.583007	-0.641805	-0.639014	-0.717133	0.185587	-0.760404	-0.637503	-0.751269	0.0282611	-0.600049	0.534216	-0.884466	-0.563573	-0.866592	-0.84744	-0.835575	0.320529	-0.449274	0.140056	-0.478643	-0.164548	0.204507	0.0576662	-0.349374	-0.0818803	-0.370361	-0.409433	0.289276	-0.290004	-0.141074	-0.340864	-0.0750168	0.377749	-0.179762
IDL-FC_%	-0.89419	-0.646019	-0.771572	-0.873565	-0.883132	-0.877275	-0.709936	-0.908263	-0.91021	-0.157667	-0.792485	-0.902112	-0.793246	-0.882906	-0.880964	-0.755878	-0.795108	-0.7884	-0.901792	-0.292303	-0.844591	-0.716343	-0.835533	-0.249804	-0.710679	0.187501	-0.60749	-0.680166	-0.609684	-0.552998	-0.563835	-0.030475	-0.672568	-0.288568	-0.407104	-0.179624	-0.10275	-0.243126	-0.538039	-0.204776	-0.535624	-0.311834	-0.0994561	-0.45139	-0.296516	-0.23545	-0.271858	0.104288	-0.289063
XL-HDL-PL_%	-0.594796	-0.889574	-0.759722	-0.557918	-0.878224	-0.563496	-0.558491	-0.759847	-0.76143	-0.575895	-0.365428	-0.700073	-0.363989	-0.51887	-0.515578	-0.571916	-0.63454	-0.632712	-0.711676	0.199179	-0.758863	-0.637344	-0.750089	0.0364472	-0.602416	0.544738	-0.898146	-0.566809	-0.880289	-0.863223	-0.851154	0.324878	-0.458094	0.141544	-0.492605	-0.172134	0.20523	0.0542704	-0.362019	-0.0907931	-0.383944	-0.426902	0.289512	-0.305229	-0.154292	-0.359885	-0.0828813	0.376182	-0.198261
S-VLDL-FC_%	-0.668031	-0.851138	-0.747724	-0.633727	-0.905432	-0.639462	-0.59852	-0.835977	-0.838205	-0.549664	-0.461138	-0.791949	-0.461188	-0.601515	-0.598165	-0.686756	-0.729705	-0.729142	-0.847611	0.01864	-0.856449	-0.719879	-0.849368	-0.00834846	-0.715555	0.346219	-0.806781	-0.682442	-0.791353	-0.768547	-0.759525	0.300781	-0.550441	-0.0454284	-0.582231	-0.331349	0.0326222	-0.00962329	-0.445427	-0.109157	-0.460812	-0.486625	0.0886079	-0.380921	-0.28948	-0.416026	-0.0551802	0.308497	-0.25848
L-VLDL-CE_%	-0.798401	-0.46446	-0.629605	-0.78233	-0.789777	-0.786186	-0.84995	-0.897047	-0.898884	-0.277004	-0.68936	-0.620984	-0.690023	-0.771029	-0.769387	-0.836913	-0.953897	-0.950437	-0.820892	-0.414213	-0.932154	-0.682921	-0.920131	-0.168844	-0.874423	-0.123822	-0.550193	-0.844895	-0.572209	-0.501254	-0.528478	-0.142928	-0.539935	-0.35661	-0.546178	-0.445349	-0.35106	-0.293468	-0.470622	-0.345669	-0.442821	-0.458497	-0.24072	-0.39027	-0.459177	-0.388944	0.0824079	0.0276038	-0.292
XL-VLDL-L	-0.823881	-0.332046	-0.466197	-0.85002	-0.671877	-0.85262	-0.71752	-0.917301	-0.919186	-0.0713845	-0.759484	-0.619882	-0.761555	-0.825778	-0.825019	-0.709141	-0.995077	-0.990747	-0.763237	-0.547334	-0.932919	-0.518201	-0.930097	-0.29974	-0.889278	-0.240888	-0.463503	-0.871498	-0.498999	-0.410366	-0.451054	-0.282313	-0.561726	-0.485437	-0.52615	-0.431276	-0.481215	-0.442032	-0.493246	-0.489891	-0.463874	-0.302035	-0.35593	-0.410765	-0.450721	-0.237262	0.16379	-0.176945	-0.276329
S-HDL-L	-0.818509	-0.714145	-0.801635	-0.785032	-0.907348	-0.790016	-0.717072	-0.864409	-0.86698	-0.319881	-0.696847	-0.866975	-0.699331	-0.805709	-0.804227	-0.788231	-0.775853	-0.773512	-0.925777	-0.201625	-0.86574	-0.791305	-0.854937	-0.228754	-0.740914	0.265638	-0.704317	-0.709161	-0.707059	-0.656176	-0.667035	0.048257	-0.685481	-0.242606	-0.517646	-0.268074	-0.0700905	-0.18623	-0.567722	-0.20549	-0.569481	-0.455752	-0.0647143	-0.490139	-0.355421	-0.382359	-0.283512	0.179513	-0.358124
M-HDL-FC_%	-0.630774	-0.876378	-0.72486	-0.601717	-0.869252	-0.607267	-0.492496	-0.778613	-0.781042	-0.520016	-0.438331	-0.828782	-0.439425	-0.580725	-0.577893	-0.584405	-0.637117	-0.637786	-0.820847	0.108398	-0.792236	-0.669622	-0.787872	-0.0430207	-0.640179	0.476174	-0.829328	-0.610455	-0.807898	-0.794929	-0.780134	0.351809	-0.565822	-0.000249466	-0.551597	-0.252782	0.132168	0.0312388	-0.453651	-0.0932185	-0.478738	-0.452863	0.163203	-0.394924	-0.244049	-0.386352	-0.150447	0.314552	-0.267032
L-VLDL-CE	-0.788025	-0.446621	-0.610962	-0.776854	-0.773188	-0.780784	-0.835516	-0.88935	-0.891471	-0.260519	-0.688166	-0.615331	-0.689889	-0.770388	-0.769173	-0.828874	-0.961179	-0.958923	-0.825147	-0.42891	-0.942132	-0.681228	-0.931054	-0.183125	-0.892391	-0.136052	-0.554946	-0.864935	-0.579708	-0.507345	-0.537156	-0.160912	-0.564476	-0.385468	-0.571504	-0.467083	-0.378436	-0.321666	-0.499513	-0.376357	-0.471474	-0.47591	-0.268771	-0.420975	-0.490206	-0.408131	0.0763865	-0.000890479	-0.323518
M-VLDL-CE_%	-0.775239	-0.461106	-0.556127	-0.789375	-0.744334	-0.793627	-0.7192	-0.896536	-0.899692	-0.203969	-0.693763	-0.675481	-0.69911	-0.789704	-0.789702	-0.748852	-0.97823	-0.979667	-0.857877	-0.425954	-0.988892	-0.650163	-0.984561	-0.251018	-0.942952	-0.0845467	-0.630568	-0.923767	-0.660148	-0.58566	-0.620433	-0.168104	-0.67653	-0.45307	-0.662741	-0.499771	-0.414368	-0.404947	-0.611578	-0.479967	-0.591984	-0.49074	-0.312571	-0.537744	-0.55127	-0.426578	0.039185	-0.0938528	-0.418328
M-VLDL-CE	-0.763216	-0.454403	-0.546407	-0.779515	-0.734119	-0.783851	-0.707428	-0.887767	-0.891094	-0.199963	-0.685327	-0.669639	-0.691287	-0.782448	-0.782671	-0.742097	-0.977448	-0.979696	-0.857993	-0.427036	-0.99166	-0.650161	-0.987879	-0.253241	-0.950047	-0.0862134	-0.636296	-0.931981	-0.666912	-0.592636	-0.628321	-0.172112	-0.688735	-0.463866	-0.677785	-0.511832	-0.425096	-0.416266	-0.626746	-0.493156	-0.60753	-0.503479	-0.323987	-0.554584	-0.567699	-0.44058	0.0343005	-0.104442	-0.436556
S-LDL-C	-0.802974	-0.312755	-0.532698	-0.830966	-0.640699	-0.834528	-0.611722	-0.793044	-0.797306	0.11412	-0.831122	-0.760498	-0.84192	-0.897639	-0.900433	-0.685578	-0.863246	-0.866165	-0.884809	-0.576528	-0.886186	-0.655577	-0.884891	-0.474321	-0.855688	-0.0737312	-0.50929	-0.847175	-0.55228	-0.464262	-0.514207	-0.375712	-0.86144	-0.654694	-0.580507	-0.38901	-0.466487	-0.600272	-0.781975	-0.535607	-0.764499	-0.411975	-0.461907	-0.710575	-0.594285	-0.356498	-0.31969	-0.256014	-0.568836
L-LDL-C	-0.79956	-0.202501	-0.422204	-0.845443	-0.5474	-0.84789	-0.542567	-0.752836	-0.756941	0.233945	-0.873408	-0.733064	-0.884901	-0.918883	-0.922562	-0.597658	-0.829849	-0.832133	-0.831122	-0.637696	-0.829161	-0.5421	-0.830506	-0.569084	-0.811425	-0.12455	-0.41235	-0.809495	-0.463799	-0.365787	-0.424055	-0.456355	-0.842293	-0.713381	-0.527257	-0.345235	-0.504484	-0.651149	-0.765007	-0.586305	-0.744001	-0.318018	-0.507824	-0.694439	-0.568481	-0.267992	-0.307768	-0.368376	-0.548772
M-VLDL-PL_%	-0.521951	-0.715267	-0.531371	-0.53802	-0.704297	-0.543923	-0.326891	-0.743694	-0.747602	-0.383214	-0.361037	-0.736253	-0.367524	-0.508331	-0.507172	-0.485363	-0.714604	-0.721596	-0.774506	-0.0402877	-0.860001	-0.590787	-0.867765	-0.0607713	-0.76451	0.265001	-0.809198	-0.750997	-0.806035	-0.78366	-0.785613	0.214211	-0.663138	-0.202821	-0.708566	-0.442303	-0.136854	-0.194858	-0.587972	-0.30267	-0.612413	-0.4809	-0.0808355	-0.542357	-0.426313	-0.427637	-0.0336548	0.0908148	-0.400658
M-VLDL-C_%	-0.689748	-0.411686	-0.486655	-0.717591	-0.670113	-0.722345	-0.637762	-0.8292	-0.833443	-0.177743	-0.633834	-0.629575	-0.643161	-0.736036	-0.737554	-0.696925	-0.963299	-0.97007	-0.850011	-0.428135	-0.996764	-0.643259	-0.995875	-0.270201	-0.980064	-0.0916994	-0.66249	-0.968362	-0.698933	-0.626146	-0.666904	-0.195732	-0.748783	-0.518915	-0.756175	-0.576001	-0.47862	-0.474537	-0.704191	-0.564795	-0.687009	-0.5711	-0.382001	-0.641999	-0.653868	-0.515883	0.0060088	-0.16359	-0.534011
L-VLDL-C_%	-0.672937	-0.273162	-0.407744	-0.704336	-0.591286	-0.708333	-0.669759	-0.795089	-0.798992	-0.114747	-0.645713	-0.52819	-0.654668	-0.724778	-0.726633	-0.701919	-0.976747	-0.982852	-0.791984	-0.528805	-0.966123	-0.59245	-0.964082	-0.294587	-0.979057	-0.244991	-0.543375	-0.969536	-0.588922	-0.5068	-0.555839	-0.297947	-0.68946	-0.58095	-0.722538	-0.607991	-0.576334	-0.518041	-0.661739	-0.602725	-0.632397	-0.54462	-0.464767	-0.599742	-0.676597	-0.493758	0.0816953	-0.235272	-0.509421
M-VLDL-C	-0.678858	-0.40619	-0.478585	-0.708212	-0.660975	-0.713027	-0.62627	-0.820169	-0.824543	-0.174017	-0.626001	-0.625192	-0.6358	-0.728862	-0.730552	-0.690089	-0.959553	-0.966955	-0.848981	-0.427992	-0.996305	-0.642738	-0.995864	-0.272087	-0.982812	-0.0920579	-0.665279	-0.972023	-0.702342	-0.630012	-0.6713	-0.197968	-0.757658	-0.526665	-0.766365	-0.584464	-0.48546	-0.482331	-0.715211	-0.573142	-0.698494	-0.57984	-0.390493	-0.654477	-0.665477	-0.525733	0.00022477	-0.171396	-0.547573
L-VLDL-C	-0.651334	-0.252107	-0.38019	-0.687856	-0.564788	-0.691876	-0.642486	-0.776652	-0.78079	-0.0982213	-0.632991	-0.514139	-0.642896	-0.711952	-0.714202	-0.680945	-0.9714	-0.978693	-0.784056	-0.534693	-0.963741	-0.579445	-0.962913	-0.304243	-0.984649	-0.253906	-0.542105	-0.977517	-0.589774	-0.507481	-0.558408	-0.309853	-0.703313	-0.601078	-0.740263	-0.623538	-0.596433	-0.538533	-0.680731	-0.627067	-0.651746	-0.553994	-0.4857	-0.621593	-0.698158	-0.505726	0.0795881	-0.261447	-0.53305
M-LDL-C	-0.758816	-0.185077	-0.430762	-0.800743	-0.52571	-0.803579	-0.530199	-0.707475	-0.712062	0.244473	-0.8429	-0.715709	-0.855968	-0.889283	-0.89349	-0.604257	-0.802372	-0.806842	-0.835224	-0.636794	-0.815756	-0.57994	-0.816844	-0.55664	-0.809828	-0.121694	-0.416539	-0.80908	-0.467947	-0.374847	-0.432841	-0.467233	-0.879652	-0.736117	-0.548461	-0.368921	-0.516073	-0.66989	-0.809327	-0.588256	-0.78932	-0.369973	-0.535439	-0.744082	-0.615919	-0.323465	-0.377571	-0.364182	-0.607656
M-VLDL-PL	-0.524154	-0.599148	-0.508278	-0.548457	-0.667438	-0.554738	-0.399324	-0.725927	-0.731063	-0.304758	-0.418307	-0.688202	-0.429527	-0.55938	-0.560472	-0.557778	-0.792001	-0.803716	-0.833643	-0.173652	-0.929707	-0.659138	-0.935486	-0.139305	-0.882166	0.159851	-0.809706	-0.873502	-0.824491	-0.787638	-0.806832	0.057553	-0.789219	-0.371813	-0.81529	-0.553627	-0.298315	-0.350872	-0.737419	-0.443276	-0.750017	-0.617964	-0.241883	-0.694823	-0.609369	-0.569526	-0.103218	-0.0261197	-0.575407
DHA/FA ratio	-0.351587	-0.590704	-0.607726	-0.323643	-0.505425	-0.32788	-0.103215	-0.318077	-0.321189	-0.0539115	-0.293188	-0.706925	-0.299668	-0.385657	-0.385878	-0.275267	-0.133877	-0.137067	-0.557203	0.125773	-0.320796	-0.546667	-0.322269	-0.110516	-0.196988	0.583155	-0.543591	-0.183745	-0.517588	-0.531648	-0.512506	0.180289	-0.609903	-0.0490812	-0.210585	0.0812544	0.251183	-0.0715804	-0.503185	0.0495382	-0.546216	-0.234639	0.12219	-0.478185	-0.123263	-0.20073	-0.737336	0.232889	-0.358302
S-LDL-C_%	-0.679395	-0.275306	-0.475308	-0.716813	-0.559682	-0.721134	-0.518131	-0.687931	-0.69345	0.125318	-0.731594	-0.693009	-0.746949	-0.809024	-0.813566	-0.626322	-0.812228	-0.821629	-0.865838	-0.534243	-0.871606	-0.662963	-0.872813	-0.460574	-0.872176	-0.0385064	-0.563004	-0.870874	-0.610528	-0.530274	-0.583624	-0.378125	-0.939464	-0.692094	-0.672874	-0.447093	-0.498991	-0.650848	-0.884303	-0.598855	-0.871482	-0.523193	-0.505166	-0.829195	-0.699235	-0.478884	-0.39557	-0.29382	-0.708635
L-LDL-C_%	-0.68508	-0.13167	-0.346169	-0.742192	-0.449964	-0.745101	-0.450825	-0.644926	-0.650158	0.274093	-0.79315	-0.658464	-0.809007	-0.841873	-0.84737	-0.534138	-0.778511	-0.786593	-0.801967	-0.628222	-0.803088	-0.531746	-0.806934	-0.580016	-0.819866	-0.122398	-0.428778	-0.825872	-0.48729	-0.393139	-0.457383	-0.490888	-0.909668	-0.772206	-0.601519	-0.400802	-0.557156	-0.718179	-0.856687	-0.656735	-0.837868	-0.4037	-0.57285	-0.801126	-0.668529	-0.365304	-0.375101	-0.432672	-0.675942
M-VLDL-L	-0.546778	-0.334186	-0.374877	-0.59233	-0.545681	-0.597619	-0.493424	-0.708019	-0.713612	-0.132653	-0.526111	-0.554231	-0.540495	-0.633395	-0.636818	-0.601045	-0.902933	-0.916681	-0.813762	-0.417142	-0.969781	-0.613369	-0.974086	-0.275767	-0.991568	-0.102153	-0.675913	-0.990642	-0.718843	-0.652761	-0.69874	-0.214731	-0.824249	-0.592981	-0.853109	-0.657346	-0.550128	-0.549645	-0.806764	-0.647256	-0.794543	-0.656033	-0.469061	-0.762775	-0.769339	-0.614902	-0.0427102	-0.248748	-0.671083
XXL-VLDL-CE_%	-0.358196	-0.506103	-0.662762	-0.299401	-0.657861	-0.30638	-0.712609	-0.474651	-0.479147	-0.510355	-0.26354	-0.3774	-0.273077	-0.379839	-0.381472	-0.778143	-0.616172	-0.629894	-0.752174	-0.0492811	-0.745696	-0.860134	-0.726755	0.0680307	-0.748224	0.180481	-0.720558	-0.722028	-0.729202	-0.714235	-0.724863	0.0797475	-0.622579	-0.197776	-0.694431	-0.507675	-0.158711	-0.134532	-0.616616	-0.22121	-0.606584	-0.89482	-0.125825	-0.589495	-0.644995	-0.854689	-0.285496	0.261811	-0.613274
M-LDL-C_%	-0.619819	-0.166129	-0.378639	-0.669731	-0.450005	-0.673531	-0.431022	-0.598091	-0.603997	0.228535	-0.719715	-0.643293	-0.737392	-0.781795	-0.787666	-0.543844	-0.74748	-0.758964	-0.815746	-0.57099	-0.804445	-0.594976	-0.808109	-0.522393	-0.828676	-0.0703003	-0.490272	-0.834771	-0.544671	-0.462211	-0.52194	-0.446204	-0.955442	-0.756288	-0.654891	-0.436592	-0.537807	-0.706225	-0.911229	-0.643625	-0.897472	-0.498543	-0.565105	-0.863902	-0.723898	-0.463454	-0.447224	-0.383744	-0.751178
M-HDL-P	-0.0835535	-0.804585	-0.360777	-0.0701185	-0.493642	-0.0753202	-0.0152753	-0.314981	-0.317406	-0.672987	0.114339	-0.427566	0.111377	-0.0382557	-0.0366158	-0.0988896	-0.198571	-0.209007	-0.416074	0.584486	-0.425029	-0.301361	-0.428374	0.217657	-0.312134	0.717514	-0.816565	-0.29835	-0.776105	-0.821392	-0.782289	0.675802	-0.276351	0.34414	-0.493913	-0.143686	0.403732	0.331588	-0.230942	0.033442	-0.279844	-0.447351	0.450253	-0.230061	-0.083942	-0.420003	-0.0135458	0.414005	-0.190465
XXL-VLDL-CE	-0.335612	-0.491437	-0.646283	-0.278574	-0.637884	-0.2856	-0.69545	-0.453613	-0.458264	-0.504586	-0.246475	-0.360254	-0.25664	-0.362667	-0.364571	-0.764863	-0.604844	-0.619499	-0.742435	-0.0461696	-0.73761	-0.854464	-0.719099	0.0688051	-0.74638	0.177935	-0.7191	-0.721535	-0.728655	-0.714788	-0.726096	0.075799	-0.627828	-0.204812	-0.703984	-0.516689	-0.1667	-0.141884	-0.626483	-0.231112	-0.616697	-0.906916	-0.135428	-0.602104	-0.659184	-0.868975	-0.291782	0.251832	-0.630126
XS-VLDL-PL	-0.47979	-0.536387	-0.537913	-0.498317	-0.609528	-0.504761	-0.385046	-0.578646	-0.584886	-0.188948	-0.45249	-0.664634	-0.469025	-0.585522	-0.589718	-0.53131	-0.664207	-0.680235	-0.845154	-0.141286	-0.834857	-0.704763	-0.836224	-0.263196	-0.808571	0.319988	-0.829207	-0.804167	-0.85437	-0.813942	-0.843768	-0.0367651	-0.916789	-0.413826	-0.786271	-0.437761	-0.226197	-0.412304	-0.871847	-0.477808	-0.885121	-0.69749	-0.230639	-0.83997	-0.654291	-0.658622	-0.437148	-0.046457	-0.751831
HDL3 cholesterol	-0.393718	-0.639483	-0.559757	-0.394959	-0.651	-0.40217	-0.395842	-0.554286	-0.560158	-0.403948	-0.308555	-0.596372	-0.323026	-0.460406	-0.463441	-0.538055	-0.634461	-0.65163	-0.80622	0.014005	-0.829835	-0.722195	-0.828153	-0.141378	-0.795518	0.385781	-0.90651	-0.785606	-0.921579	-0.896692	-0.915394	0.121862	-0.814237	-0.261066	-0.837186	-0.491411	-0.138059	-0.263133	-0.781773	-0.39884	-0.799088	-0.777313	-0.108151	-0.756942	-0.623162	-0.738545	-0.315335	0.0861962	-0.697934
S-LDL-CE	-0.486827	-0.208538	-0.368277	-0.53622	-0.420392	-0.541203	-0.361316	-0.51604	-0.522875	0.142587	-0.570236	-0.573145	-0.590695	-0.656474	-0.663075	-0.506984	-0.701245	-0.718395	-0.793664	-0.454099	-0.803562	-0.626768	-0.80835	-0.427851	-0.843589	0.0102323	-0.597495	-0.852209	-0.648679	-0.582036	-0.637321	-0.364396	-0.990546	-0.70717	-0.75234	-0.492711	-0.513557	-0.684014	-0.968573	-0.65187	-0.96265	-0.628311	-0.53425	-0.937186	-0.792379	-0.600897	-0.472557	-0.334653	-0.848295
L-VLDL-L	-0.371472	-0.0127362	-0.0626776	-0.460743	-0.233413	-0.464626	-0.274059	-0.507392	-0.513738	0.113446	-0.454309	-0.345544	-0.473788	-0.525469	-0.531872	-0.380794	-0.810361	-0.829439	-0.632841	-0.546758	-0.840963	-0.390041	-0.853954	-0.403506	-0.939017	-0.295279	-0.485857	-0.958617	-0.55189	-0.474426	-0.541316	-0.417958	-0.808599	-0.76547	-0.849957	-0.707543	-0.739951	-0.722813	-0.837555	-0.829783	-0.817569	-0.583825	-0.661693	-0.81387	-0.853385	-0.567467	0.00444558	-0.525517	-0.74461
S-LDL-CE_%	-0.397814	-0.17119	-0.317115	-0.451009	-0.353194	-0.45617	-0.293476	-0.433705	-0.44097	0.151196	-0.494132	-0.509187	-0.516382	-0.581629	-0.588998	-0.451618	-0.643529	-0.663598	-0.748362	-0.4183	-0.760403	-0.602635	-0.766391	-0.407232	-0.8176	0.0234076	-0.597069	-0.830181	-0.649302	-0.589126	-0.644646	-0.358875	-0.994731	-0.705072	-0.771353	-0.505104	-0.515771	-0.690198	-0.987671	-0.66403	-0.984111	-0.662365	-0.542439	-0.966716	-0.820461	-0.642606	-0.49734	-0.34854	-0.89348
ApoA1	-0.184944	-0.537432	-0.293542	-0.23099	-0.407122	-0.237313	-0.0165987	-0.37058	-0.376785	-0.284936	-0.131492	-0.500186	-0.148702	-0.28135	-0.285704	-0.188676	-0.447333	-0.468036	-0.599032	0.107275	-0.662215	-0.450699	-0.674666	-0.203453	-0.64134	0.457643	-0.855821	-0.649561	-0.874766	-0.857684	-0.878988	0.125503	-0.753619	-0.236271	-0.810328	-0.445902	-0.114913	-0.301503	-0.739846	-0.460189	-0.775429	-0.610472	-0.0851224	-0.738387	-0.540945	-0.592417	-0.264744	-0.0626234	-0.666295
M-LDL-CE	-0.39048	-0.0786513	-0.249809	-0.451766	-0.28407	-0.456237	-0.259561	-0.394351	-0.401586	0.239089	-0.522884	-0.484447	-0.545817	-0.592383	-0.60041	-0.410162	-0.616054	-0.635974	-0.716462	-0.480008	-0.715913	-0.546873	-0.723039	-0.470826	-0.787158	-0.0339169	-0.512117	-0.803926	-0.570299	-0.503998	-0.565355	-0.429893	-0.987583	-0.763013	-0.734433	-0.491781	-0.556655	-0.732708	-0.983857	-0.69307	-0.976482	-0.613328	-0.596614	-0.963903	-0.821959	-0.597888	-0.51092	-0.423813	-0.891945
L-LDL-CE	-0.409263	0.0384769	-0.149691	-0.485726	-0.205721	-0.489008	-0.228156	-0.375348	-0.382203	0.350979	-0.583048	-0.451516	-0.6059	-0.628733	-0.637388	-0.350436	-0.606617	-0.624799	-0.665835	-0.567381	-0.670572	-0.441239	-0.679205	-0.569464	-0.754288	-0.116517	-0.400735	-0.776002	-0.469173	-0.388564	-0.46013	-0.53028	-0.951275	-0.826504	-0.6749	-0.457631	-0.612641	-0.788555	-0.949609	-0.742089	-0.935447	-0.512009	-0.651644	-0.927328	-0.792202	-0.500037	-0.469243	-0.535339	-0.852274
M-LDL-CE_%	-0.389111	-0.101898	-0.271781	-0.445969	-0.297333	-0.450481	-0.254614	-0.38773	-0.394943	0.234725	-0.517747	-0.501861	-0.54042	-0.588384	-0.596223	-0.41205	-0.592309	-0.611946	-0.722452	-0.453985	-0.701784	-0.560308	-0.708171	-0.445234	-0.765712	-0.00343379	-0.51544	-0.781355	-0.569162	-0.508065	-0.565119	-0.399257	-0.992291	-0.741673	-0.716331	-0.464404	-0.52147	-0.710246	-0.982349	-0.65747	-0.977195	-0.612795	-0.576349	-0.962667	-0.806635	-0.596668	-0.544086	-0.395725	-0.888864
XS-VLDL-PL_%	-0.246216	-0.436538	-0.410732	-0.270444	-0.433476	-0.277287	-0.214284	-0.352139	-0.359372	-0.171567	-0.254034	-0.493487	-0.274896	-0.387078	-0.393215	-0.389456	-0.495557	-0.518756	-0.721343	-0.0433516	-0.703394	-0.643295	-0.707014	-0.21406	-0.72038	0.360797	-0.812973	-0.725512	-0.84043	-0.816989	-0.84708	-0.0206694	-0.91334	-0.39785	-0.817358	-0.457013	-0.215853	-0.413139	-0.906279	-0.490332	-0.92536	-0.779124	-0.24098	-0.901509	-0.712024	-0.760306	-0.514935	-0.0691941	-0.857753
XL-HDL-FC_%	-0.217469	0.211157	0.0849801	-0.303768	-0.0394694	-0.305911	-0.172415	-0.225982	-0.230702	0.194537	-0.363385	-0.0576756	-0.381736	-0.391102	-0.399675	-0.20109	-0.527626	-0.541605	-0.35127	-0.554174	-0.504521	-0.176455	-0.510742	-0.620799	-0.62154	-0.257133	-0.272422	-0.645868	-0.378961	-0.254309	-0.361592	-0.659705	-0.580535	-0.688305	-0.618765	-0.488005	-0.682995	-0.785753	-0.639423	-0.769259	-0.612449	-0.339267	-0.58103	-0.630496	-0.609727	-0.341802	-0.0409358	-0.612892	-0.618719
S-HDL-C	-0.246232	-0.192383	-0.330205	-0.278426	-0.326209	-0.284633	-0.299903	-0.306252	-0.313915	0.00328902	-0.327175	-0.373471	-0.350704	-0.427133	-0.435014	-0.464109	-0.554018	-0.578734	-0.702388	-0.279852	-0.706352	-0.655135	-0.707421	-0.291191	-0.78474	0.0949326	-0.651734	-0.795073	-0.69974	-0.65682	-0.706564	-0.262902	-0.955178	-0.605512	-0.818903	-0.538266	-0.450469	-0.589935	-0.976381	-0.604878	-0.974201	-0.819123	-0.472486	-0.971944	-0.861398	-0.807507	-0.527821	-0.228437	-0.954412
S-HDL-C_%	-0.214859	-0.16429	-0.302212	-0.249474	-0.292895	-0.255624	-0.274481	-0.274206	-0.281966	0.0187706	-0.303869	-0.343914	-0.327946	-0.401484	-0.409655	-0.440445	-0.532921	-0.558444	-0.678706	-0.278457	-0.685458	-0.637035	-0.687066	-0.289015	-0.771859	0.0852262	-0.636913	-0.783972	-0.686089	-0.644416	-0.695004	-0.272736	-0.950336	-0.611449	-0.817551	-0.540828	-0.459727	-0.598062	-0.977569	-0.612459	-0.975276	-0.820761	-0.483398	-0.97664	-0.869077	-0.81226	-0.530243	-0.243499	-0.964692
S-HDL-CE	-0.209781	-0.160812	-0.296007	-0.24552	-0.287331	-0.251654	-0.270731	-0.271394	-0.279166	0.0211099	-0.299167	-0.337317	-0.323318	-0.397165	-0.405375	-0.435068	-0.53295	-0.558624	-0.674097	-0.275299	-0.684891	-0.630917	-0.686676	-0.283396	-0.772639	0.0846877	-0.638264	-0.785062	-0.687407	-0.646267	-0.696717	-0.271579	-0.948817	-0.609812	-0.817843	-0.539098	-0.460583	-0.59814	-0.977368	-0.615782	-0.974998	-0.821632	-0.482383	-0.977014	-0.870022	-0.813559	-0.525415	-0.245337	-0.965866
XXL-VLDL-C_%	-0.0738018	-0.30227	-0.438186	-0.0348282	-0.387486	-0.0418866	-0.487593	-0.194656	-0.200576	-0.423716	-0.0494816	-0.146149	-0.0654377	-0.155086	-0.159715	-0.585173	-0.440388	-0.463871	-0.59167	-0.00459504	-0.597292	-0.746155	-0.583346	0.078295	-0.672671	0.14359	-0.652727	-0.662719	-0.671019	-0.67014	-0.68756	0.0316177	-0.63212	-0.256601	-0.751789	-0.574436	-0.228979	-0.196138	-0.680739	-0.310602	-0.672949	-0.985674	-0.218603	-0.686923	-0.764085	-0.973241	-0.345593	0.143772	-0.763908
S-HDL-CE_%	-0.187458	-0.140241	-0.275857	-0.224841	-0.263297	-0.230926	-0.252916	-0.248388	-0.256221	0.0324235	-0.282612	-0.315895	-0.307126	-0.378747	-0.387156	-0.418094	-0.5176	-0.543818	-0.656674	-0.274367	-0.669392	-0.617505	-0.671538	-0.281243	-0.762829	0.0772328	-0.626727	-0.776491	-0.676634	-0.636448	-0.687426	-0.278558	-0.944426	-0.613654	-0.815804	-0.540328	-0.466864	-0.603381	-0.97724	-0.620531	-0.974731	-0.822112	-0.489943	-0.979358	-0.87488	-0.81625	-0.526696	-0.255901	-0.972246
XXL-VLDL-C	-0.0436914	-0.286094	-0.414698	-0.00683695	-0.360359	-0.0138928	-0.458856	-0.165954	-0.17199	-0.417007	-0.0248603	-0.125286	-0.0413564	-0.129781	-0.134652	-0.560748	-0.418484	-0.442853	-0.573362	0.00543321	-0.579287	-0.731043	-0.566047	0.0812108	-0.660303	0.144928	-0.646276	-0.651998	-0.664919	-0.666053	-0.683567	0.0332476	-0.62985	-0.257144	-0.754728	-0.577206	-0.230362	-0.197392	-0.683127	-0.314922	-0.676224	-0.989664	-0.222472	-0.692758	-0.769845	-0.980001	-0.349951	0.134856	-0.774039
L-LDL-CE_%	-0.242046	0.142637	-0.0346324	-0.324989	-0.0565698	-0.328213	-0.0933395	-0.20631	-0.213681	0.395658	-0.447027	-0.318402	-0.472483	-0.485291	-0.495217	-0.234001	-0.477464	-0.499853	-0.555649	-0.522797	-0.556525	-0.370566	-0.567339	-0.538583	-0.672972	-0.122222	-0.345991	-0.702361	-0.4167	-0.346853	-0.419208	-0.540293	-0.928541	-0.827001	-0.668472	-0.461304	-0.620153	-0.800122	-0.953161	-0.74763	-0.941739	-0.532252	-0.677299	-0.949629	-0.818204	-0.535389	-0.507116	-0.573991	-0.903048
Sphingomyelins	-0.0972549	-0.0225397	-0.0831516	-0.166023	-0.132173	-0.171612	-0.121724	-0.207413	-0.215454	0.0623122	-0.207895	-0.216376	-0.233747	-0.297682	-0.306775	-0.284593	-0.536901	-0.565578	-0.554464	-0.329843	-0.667245	-0.473874	-0.67678	-0.343827	-0.793218	-0.0496408	-0.58018	-0.817441	-0.643889	-0.593327	-0.656664	-0.354055	-0.892406	-0.680558	-0.896285	-0.674092	-0.599988	-0.693763	-0.953484	-0.753605	-0.949094	-0.776379	-0.584203	-0.964319	-0.920595	-0.780623	-0.324325	-0.425381	-0.957944
IL1B	0.0609837	-0.539406	-0.32739	0.0579109	-0.360302	0.0505855	-0.0806339	-0.172338	-0.177818	-0.545719	0.172421	-0.218443	0.157876	0.0118832	0.00835523	-0.201081	-0.291987	-0.315468	-0.415411	0.338753	-0.521327	-0.492621	-0.52374	0.0561938	-0.524368	0.518107	-0.8868	-0.522929	-0.894512	-0.905549	-0.913033	0.259366	-0.537813	0.0159838	-0.776628	-0.448854	0.00554666	-0.0955953	-0.574691	-0.305977	-0.607616	-0.764022	0.0999224	-0.595391	-0.515269	-0.756905	-0.195009	0.155764	-0.617167
Thrombocytes	-0.0197012	0.0201124	-0.0168433	-0.0813781	-0.0969944	-0.0867987	-0.199001	-0.19121	-0.198354	-0.0757719	-0.0906764	-0.0249298	-0.113398	-0.180074	-0.188099	-0.304087	-0.57362	-0.601333	-0.464747	-0.28655	-0.663714	-0.411584	-0.669884	-0.171798	-0.810631	-0.152771	-0.546798	-0.830934	-0.61079	-0.562745	-0.624285	-0.294955	-0.717158	-0.57979	-0.885727	-0.715575	-0.621562	-0.602383	-0.806695	-0.722605	-0.79117	-0.808181	-0.548236	-0.821477	-0.900185	-0.814222	-0.064208	-0.360759	-0.854856
XL-HDL-FC	-0.128829	0.299088	0.141078	-0.214397	0.0561407	-0.216794	-0.0976151	-0.108928	-0.11469	0.262956	-0.324818	-0.025653	-0.347093	-0.340688	-0.350735	-0.171579	-0.444307	-0.463464	-0.345435	-0.579641	-0.450717	-0.199759	-0.457974	-0.656042	-0.600013	-0.29037	-0.209107	-0.630926	-0.314986	-0.202217	-0.308306	-0.684549	-0.653525	-0.77714	-0.65627	-0.546698	-0.727946	-0.816362	-0.725798	-0.787317	-0.699107	-0.422519	-0.676722	-0.728775	-0.712329	-0.435507	-0.170901	-0.653149	-0.737494
IL-1B response to C. Albicans	-0.159256	0.417736	0.308273	-0.276375	0.198756	-0.277296	0.0276333	-0.181048	-0.18671	0.461266	-0.373457	-0.0927024	-0.394501	-0.366039	-0.374655	-0.0263023	-0.531711	-0.550534	-0.298624	-0.669234	-0.491	-0.0248764	-0.512001	-0.604472	-0.652449	-0.470124	-0.0919685	-0.691848	-0.174619	-0.0920021	-0.173585	-0.680743	-0.625386	-0.868922	-0.616154	-0.602627	-0.802322	-0.808121	-0.691455	-0.889746	-0.663429	-0.295975	-0.759496	-0.688949	-0.739338	-0.308884	-0.0103794	-0.768506	-0.646179
Esterized cholesterol	-0.0875837	-0.0117862	-0.039909	-0.169023	-0.0730493	-0.173915	0.0210796	-0.154372	-0.162465	0.189443	-0.22853	-0.276791	-0.255305	-0.310654	-0.320244	-0.165239	-0.429734	-0.457707	-0.527163	-0.303204	-0.576777	-0.393076	-0.590816	-0.397001	-0.686482	0.038308	-0.536002	-0.716333	-0.595315	-0.549758	-0.609499	-0.342825	-0.922863	-0.683157	-0.806524	-0.542458	-0.528447	-0.698888	-0.965208	-0.721009	-0.970927	-0.660152	-0.555999	-0.978834	-0.839584	-0.668316	-0.449538	-0.459633	-0.94744
LDL cholesterol	-0.0716424	0.0335881	-0.0409541	-0.147169	-0.0535615	-0.152079	-0.00924608	-0.125137	-0.133307	0.205619	-0.224831	-0.239247	-0.252011	-0.299491	-0.309346	-0.19526	-0.421132	-0.449622	-0.522336	-0.335426	-0.561664	-0.41657	-0.573764	-0.387195	-0.684901	-0.00910462	-0.498384	-0.714442	-0.55973	-0.513951	-0.575469	-0.375523	-0.923211	-0.70958	-0.798679	-0.556244	-0.558304	-0.712409	-0.972776	-0.716264	-0.97395	-0.688322	-0.593441	-0.987975	-0.869587	-0.698426	-0.473519	-0.461068	-0.969684
Serum cholesterol	-0.0375178	0.0260861	-0.00130351	-0.119651	-0.0324923	-0.124591	0.0359839	-0.113993	-0.122189	0.177156	-0.182978	-0.218514	-0.210273	-0.262837	-0.272699	-0.14892	-0.414926	-0.444271	-0.494848	-0.300817	-0.560017	-0.376898	-0.574092	-0.380569	-0.684585	0.00692375	-0.519825	-0.716019	-0.581319	-0.537249	-0.598486	-0.350399	-0.901433	-0.686352	-0.823198	-0.575738	-0.552435	-0.700278	-0.956776	-0.733811	-0.960645	-0.684559	-0.573633	-0.975471	-0.863239	-0.696809	-0.419313	-0.47148	-0.958313
Cholesterol	-0.0368525	0.0250494	0.00206377	-0.123639	-0.0302559	-0.128567	0.0552113	-0.118339	-0.126358	0.197386	-0.174899	-0.199595	-0.201888	-0.258455	-0.268247	-0.137872	-0.415473	-0.443763	-0.467598	-0.311205	-0.552709	-0.360457	-0.567648	-0.39524	-0.673107	0.00111428	-0.520819	-0.705049	-0.586351	-0.535956	-0.601459	-0.37617	-0.891269	-0.680493	-0.809814	-0.555368	-0.567365	-0.729799	-0.947014	-0.737927	-0.951999	-0.642501	-0.57206	-0.965419	-0.829135	-0.654858	-0.400572	-0.480467	-0.941785
Leptin	-0.00206258	0.171711	0.176688	-0.10384	0.103666	-0.107122	-0.00257094	-0.136308	-0.142883	0.193784	-0.131114	0.0333988	-0.154176	-0.196608	-0.205411	-0.0380007	-0.513898	-0.540081	-0.301407	-0.295938	-0.553711	-0.124949	-0.569616	-0.275795	-0.709028	-0.169796	-0.429752	-0.741465	-0.493464	-0.447543	-0.508191	-0.380916	-0.656911	-0.593392	-0.748041	-0.562313	-0.604956	-0.617925	-0.747909	-0.809232	-0.733551	-0.577954	-0.470745	-0.765208	-0.780442	-0.592956	-0.0423578	-0.481721	-0.773153
IDL-P	-0.0214795	0.105993	0.0413684	-0.107146	0.0187395	-0.111718	0.0400844	-0.0852648	-0.0934385	0.239259	-0.187132	-0.174406	-0.21475	-0.254603	-0.264776	-0.141729	-0.408978	-0.438308	-0.464513	-0.359952	-0.536048	-0.353468	-0.550275	-0.390184	-0.676679	-0.073106	-0.453003	-0.710308	-0.518614	-0.471447	-0.536457	-0.411468	-0.891204	-0.733644	-0.801161	-0.584986	-0.608853	-0.741834	-0.954183	-0.752919	-0.953064	-0.666293	-0.633287	-0.974177	-0.882367	-0.681806	-0.410145	-0.520581	-0.96199
L-LDL-P	0.0112233	0.0691955	0.0179333	-0.0673615	0.010284	-0.0722848	0.0511541	-0.0566512	-0.0649148	0.195654	-0.144684	-0.166505	-0.172462	-0.21885	-0.228991	-0.13863	-0.371862	-0.402076	-0.461656	-0.30048	-0.516834	-0.373868	-0.530154	-0.356868	-0.653486	-0.0151268	-0.483308	-0.685903	-0.544874	-0.504719	-0.565598	-0.361932	-0.888229	-0.688888	-0.803897	-0.57096	-0.559144	-0.699766	-0.952152	-0.716798	-0.954708	-0.69658	-0.589432	-0.975943	-0.872089	-0.713106	-0.445211	-0.467877	-0.971997
XL-VLDL-PL	-0.00369146	0.213004	0.342281	-0.144767	0.187228	-0.146856	0.277224	-0.146018	-0.152415	0.345954	-0.148747	-0.110507	-0.171174	-0.198519	-0.206624	0.125471	-0.445024	-0.468585	-0.256676	-0.397109	-0.492883	0.0217444	-0.522883	-0.399969	-0.623398	-0.255625	-0.299988	-0.668236	-0.36379	-0.311532	-0.373718	-0.389972	-0.659392	-0.697618	-0.701823	-0.554944	-0.681083	-0.717669	-0.72269	-0.831992	-0.723778	-0.325968	-0.629271	-0.738512	-0.697464	-0.345066	0.0356325	-0.69311	-0.673528
Amount and abdominal adipose tissue (AAT)	0.048762	0.360543	0.233864	-0.0134246	0.119245	-0.015868	-0.162221	-0.0477301	-0.0528781	0.0788885	-0.092788	0.184155	-0.111007	-0.10033	-0.107768	-0.226951	-0.45258	-0.474703	-0.23976	-0.503174	-0.446075	-0.19691	-0.449153	-0.288784	-0.63812	-0.559994	-0.0988703	-0.663514	-0.174604	-0.111518	-0.183642	-0.467486	-0.44621	-0.67463	-0.697234	-0.749972	-0.79034	-0.594732	-0.559652	-0.660733	-0.519008	-0.587551	-0.701182	-0.574841	-0.814346	-0.606393	0.167146	-0.531256	-0.644775
Free cholesterol	0.069589	0.106621	0.0799062	-0.0120639	0.0534207	-0.0170115	0.0634679	-0.0261778	-0.0344257	0.145684	-0.0824583	-0.0887311	-0.110302	-0.155877	-0.166123	-0.113541	-0.376621	-0.40832	-0.41649	-0.289927	-0.514339	-0.336549	-0.528051	-0.337245	-0.668488	-0.0612113	-0.475654	-0.702537	-0.540628	-0.50056	-0.563804	-0.360109	-0.837288	-0.679226	-0.843343	-0.636756	-0.593335	-0.688996	-0.919613	-0.746959	-0.919178	-0.72555	-0.599807	-0.948686	-0.898148	-0.746205	-0.345235	-0.486896	-0.962981
S-LDL-P	0.0605613	0.0877008	0.0432647	-0.0172534	0.0521899	-0.0220642	0.104015	0.00336917	-0.0048925	0.210283	-0.103483	-0.138417	-0.131579	-0.174176	-0.184541	-0.092839	-0.305088	-0.335849	-0.422122	-0.269245	-0.458075	-0.347363	-0.471903	-0.351531	-0.597018	0.0105849	-0.458111	-0.631121	-0.518096	-0.482837	-0.541955	-0.349182	-0.869867	-0.667967	-0.773975	-0.540054	-0.528885	-0.681292	-0.936604	-0.689133	-0.942016	-0.679282	-0.571618	-0.965798	-0.84823	-0.700106	-0.479921	-0.460418	-0.968303
M-LDL-P	0.0766409	0.079701	0.0374366	0.00113382	0.0490902	-0.00384506	0.0937516	0.00991995	0.00162948	0.185008	-0.0809655	-0.118738	-0.109058	-0.155288	-0.165636	-0.0982867	-0.306756	-0.338074	-0.415281	-0.248001	-0.462064	-0.35561	-0.475176	-0.329429	-0.603521	0.0189653	-0.477885	-0.636858	-0.537112	-0.504202	-0.562277	-0.336561	-0.862414	-0.649452	-0.786232	-0.549583	-0.522311	-0.668782	-0.933993	-0.689552	-0.939144	-0.704133	-0.557396	-0.964825	-0.855995	-0.725381	-0.469524	-0.444041	-0.974358
Acetate	0.160542	0.315866	0.317135	0.0826426	0.189642	0.0796255	-0.0294776	0.00172151	-0.00398299	0.00668407	0.0375688	0.243629	0.0174268	0.00671377	-0.0011974	-0.105946	-0.426671	-0.452969	-0.19669	-0.361951	-0.447117	-0.110746	-0.456292	-0.192592	-0.644786	-0.440915	-0.210408	-0.675736	-0.281625	-0.233215	-0.299335	-0.354008	-0.438968	-0.597335	-0.756923	-0.737371	-0.722452	-0.541108	-0.566553	-0.70732	-0.53719	-0.626532	-0.627064	-0.595025	-0.803931	-0.651739	0.21783	-0.501391	-0.669489
Total cholesterol	0.17372	-0.0498218	0.0879071	0.088357	0.073285	0.0833527	0.293539	0.0512814	0.0434381	0.0920335	0.0677859	-0.135486	0.0415779	-0.0296903	-0.0388621	0.0888706	-0.193528	-0.224521	-0.318267	-0.0301268	-0.386574	-0.23096	-0.406553	-0.254659	-0.49017	0.217184	-0.565034	-0.525485	-0.608046	-0.596202	-0.637786	-0.150107	-0.769684	-0.462103	-0.757077	-0.472167	-0.343304	-0.53538	-0.831974	-0.615996	-0.858404	-0.603798	-0.368688	-0.872181	-0.703255	-0.627972	-0.398559	-0.370566	-0.862139
L-VLDL-PL	0.203281	0.029073	0.17846	0.10774	0.136993	0.102997	0.31705	0.0508694	0.0429666	0.11036	0.0897088	-0.087275	0.063355	0.00181912	-0.00718871	0.0971293	-0.231835	-0.264058	-0.298617	-0.0968817	-0.40706	-0.187949	-0.430364	-0.223803	-0.53402	0.065411	-0.493525	-0.573365	-0.538002	-0.526924	-0.569232	-0.154704	-0.742991	-0.524997	-0.788756	-0.552138	-0.449152	-0.549609	-0.819011	-0.658566	-0.839897	-0.609045	-0.464812	-0.860918	-0.761554	-0.636795	-0.276981	-0.429535	-0.853448
Nascent HDL cholesterol	0.166952	0.230728	0.172636	0.0770904	0.19433	0.073014	0.192065	0.118882	0.110887	0.298583	-0.0248038	0.016476	-0.0533419	-0.0791141	-0.0902293	0.0068904	-0.228304	-0.259404	-0.28117	-0.298173	-0.352658	-0.230963	-0.368121	-0.362213	-0.520026	-0.0744604	-0.352531	-0.560339	-0.421953	-0.38202	-0.449403	-0.434304	-0.790603	-0.680145	-0.715234	-0.51611	-0.584365	-0.728391	-0.881502	-0.713886	-0.88272	-0.607787	-0.610242	-0.921019	-0.817386	-0.639985	-0.425426	-0.537746	-0.942578
XL-VLDL-PL_%	0.171535	0.294891	0.460896	0.0273945	0.339743	0.0257148	0.448774	0.0406341	0.034258	0.382745	0.00481304	0.0137652	-0.0185169	-0.0343051	-0.0430579	0.284176	-0.258304	-0.284109	-0.108395	-0.305708	-0.322796	0.132276	-0.355221	-0.364168	-0.469571	-0.218414	-0.220172	-0.520893	-0.280723	-0.243451	-0.301242	-0.356713	-0.580292	-0.636327	-0.631702	-0.495831	-0.6211	-0.671497	-0.661718	-0.777058	-0.669432	-0.27805	-0.592914	-0.696052	-0.641212	-0.312081	0.00184987	-0.698913	-0.655024
Lymphocytes	0.277334	-0.35457	-0.272521	0.306841	-0.194133	0.299595	-0.0817365	0.111181	0.105459	-0.50613	0.333134	0.0206759	0.316506	0.206194	0.201281	-0.214932	-0.063747	-0.0903497	-0.356049	0.34844	-0.301486	-0.508839	-0.294918	0.270833	-0.358596	0.427896	-0.685063	-0.35803	-0.692382	-0.72155	-0.726649	0.274505	-0.4749	0.0137585	-0.642529	-0.364224	0.023372	-0.0268772	-0.544141	-0.10787	-0.566816	-0.862149	0.0422339	-0.587855	-0.545976	-0.872828	-0.367903	0.254429	-0.686976
Omega-6 fatty acids (FAw6)	0.270045	0.200968	0.195244	0.187647	0.244138	0.183484	0.285139	0.219559	0.211526	0.245659	0.0841176	0.043994	0.0555472	0.0266226	0.0155854	0.0977567	-0.10391	-0.136911	-0.223744	-0.157542	-0.260342	-0.19516	-0.276655	-0.289045	-0.423148	0.0455936	-0.365081	-0.464192	-0.421764	-0.403852	-0.457813	-0.322207	-0.744331	-0.577534	-0.681639	-0.468697	-0.456609	-0.617948	-0.837557	-0.637479	-0.84827	-0.619129	-0.510382	-0.888233	-0.774224	-0.657448	-0.481855	-0.463141	-0.924528
XS-VLDL-P	0.292078	0.315251	0.276163	0.204115	0.304812	0.200345	0.26038	0.229123	0.221155	0.276486	0.0894498	0.123963	0.0608854	0.0483884	0.03726	0.0792614	-0.148012	-0.181542	-0.193035	-0.260068	-0.27283	-0.165012	-0.289138	-0.286309	-0.466238	-0.135379	-0.272841	-0.509864	-0.336463	-0.312838	-0.372792	-0.392477	-0.707837	-0.656841	-0.704172	-0.561174	-0.58718	-0.666239	-0.819746	-0.688525	-0.819348	-0.63047	-0.622243	-0.871154	-0.839329	-0.672318	-0.362314	-0.542105	-0.920779
Polyunsaturated fatty acids (PUFA)	0.274377	0.189413	0.190926	0.192635	0.245259	0.188489	0.305375	0.226753	0.218757	0.249474	0.0904196	0.0314385	0.0620178	0.0324943	0.0215777	0.112502	-0.0838924	-0.116663	-0.218696	-0.142118	-0.245308	-0.191096	-0.262186	-0.287651	-0.402768	0.0670993	-0.364798	-0.443847	-0.419158	-0.403836	-0.455629	-0.308273	-0.742365	-0.564633	-0.667713	-0.451815	-0.434902	-0.606904	-0.832006	-0.621588	-0.845202	-0.603397	-0.495331	-0.883136	-0.756412	-0.641838	-0.499872	-0.45392	-0.915434
Phosphatidylcholine (and other cholines)	0.306065	-0.0177475	0.173875	0.222246	0.17637	0.217623	0.413943	0.181489	0.173962	0.0732717	0.198376	-0.0395315	0.172691	0.106978	0.097857	0.211936	-0.0519902	-0.0840114	-0.202051	0.0819998	-0.256618	-0.131687	-0.277986	-0.188532	-0.365265	0.2689	-0.514144	-0.403503	-0.549242	-0.554312	-0.586901	-0.0690721	-0.669804	-0.366018	-0.690265	-0.411915	-0.25407	-0.437327	-0.743393	-0.545217	-0.775529	-0.564248	-0.28985	-0.796747	-0.629116	-0.597991	-0.385213	-0.329701	-0.807426
%Monocytes	0.0821382	-0.48293	-0.145588	0.0751039	-0.158224	0.0711514	0.232853	-0.051503	-0.0555782	-0.30925	0.137104	-0.369792	0.127099	0.0378215	0.0364801	0.0840195	0.000775271	-0.0165804	-0.358095	0.453325	-0.229424	-0.196894	-0.24348	0.180065	-0.187321	0.585123	-0.541215	-0.193839	-0.49933	-0.566653	-0.52488	0.554006	-0.388866	0.113812	-0.389674	-0.10468	0.319396	0.227113	-0.358558	-0.0248472	-0.408416	-0.417716	0.209349	-0.379125	-0.226374	-0.415115	-0.308197	0.249761	-0.343831
Linoleic acid (LA)	0.276767	0.273826	0.22949	0.191654	0.291601	0.187962	0.29064	0.248358	0.240446	0.316119	0.0696616	0.0769453	0.0410153	0.0251566	0.01384	0.112397	-0.0864758	-0.11886	-0.191268	-0.206728	-0.224814	-0.166128	-0.241125	-0.304465	-0.398367	-0.00977688	-0.297796	-0.441124	-0.357588	-0.336746	-0.393672	-0.380809	-0.731241	-0.612218	-0.638423	-0.448642	-0.489244	-0.65006	-0.828049	-0.644548	-0.834733	-0.583676	-0.550708	-0.879133	-0.772527	-0.624645	-0.493608	-0.502565	-0.918072
XXL-VLDL-L	0.380025	-0.0176559	-0.0441878	0.387882	0.0579756	0.381819	-0.0283705	0.260261	0.253564	-0.283535	0.321058	0.19867	0.299695	0.242033	0.234512	-0.165903	-0.0562446	-0.0892714	-0.237535	0.14527	-0.245153	-0.433116	-0.241567	0.117593	-0.395196	0.138904	-0.46234	-0.40923	-0.483756	-0.512125	-0.528863	0.0463479	-0.497351	-0.219014	-0.684809	-0.535978	-0.213027	-0.176769	-0.610218	-0.321155	-0.614158	-0.922636	-0.238993	-0.666029	-0.74375	-0.95234	-0.361276	0.00794098	-0.804247
Remnant cholesterol	0.290102	0.413487	0.357083	0.190175	0.377487	0.187338	0.293963	0.255024	0.247372	0.372315	0.0563774	0.16213	0.0279321	0.0337282	0.0221429	0.134483	-0.131634	-0.163818	-0.138974	-0.323697	-0.226648	-0.0779823	-0.244502	-0.350605	-0.430964	-0.19971	-0.183082	-0.47863	-0.253974	-0.22091	-0.287984	-0.473578	-0.673158	-0.699893	-0.647639	-0.527618	-0.628539	-0.71095	-0.788371	-0.724404	-0.783246	-0.545347	-0.662785	-0.839144	-0.81128	-0.590772	-0.333821	-0.626488	-0.886637
%Basophils	0.410645	0.337217	0.360561	0.339149	0.347354	0.335577	0.208928	0.302807	0.295661	0.0655514	0.235143	0.300945	0.209326	0.200046	0.189677	0.0923965	-0.110293	-0.144852	-0.104356	-0.133617	-0.225145	-0.0917987	-0.235948	-0.138096	-0.439053	-0.170078	-0.243157	-0.478614	-0.301276	-0.290588	-0.342645	-0.252313	-0.510815	-0.513401	-0.710345	-0.60816	-0.52758	-0.47451	-0.653591	-0.621417	-0.644103	-0.710886	-0.527312	-0.71416	-0.817388	-0.757551	-0.137255	-0.446476	-0.82593
L-VLDL-PL_%	0.366426	0.067124	0.256994	0.278267	0.259967	0.273932	0.46917	0.230613	0.223073	0.106511	0.246135	0.0146959	0.220341	0.168353	0.159374	0.238512	-0.02393	-0.0570424	-0.159374	0.0368944	-0.21992	-0.0928958	-0.244297	-0.149394	-0.349012	0.144151	-0.414857	-0.391328	-0.448686	-0.459133	-0.489908	-0.0628796	-0.634085	-0.409951	-0.679905	-0.452997	-0.324364	-0.435175	-0.719018	-0.542337	-0.748674	-0.550922	-0.374156	-0.777325	-0.660404	-0.590752	-0.327137	-0.368816	-0.793231
Albumin	0.471552	0.256403	0.359922	0.402502	0.366695	0.398594	0.327885	0.358804	0.351493	0.0166379	0.308508	0.261711	0.28226	0.262385	0.252151	0.187729	-0.00959291	-0.0456798	-0.0870634	0.000325965	-0.165382	-0.062013	-0.179704	-0.12234	-0.360116	-0.0103916	-0.29524	-0.401221	-0.341872	-0.3481	-0.388853	-0.135728	-0.505211	-0.42554	-0.696824	-0.551823	-0.396341	-0.380242	-0.639616	-0.565292	-0.644792	-0.69616	-0.413733	-0.707646	-0.753908	-0.745794	-0.215203	-0.373167	-0.813501
ApoB	0.386301	0.394346	0.365097	0.29528	0.418417	0.292255	0.370878	0.353461	0.34587	0.336659	0.160221	0.209849	0.131843	0.134762	0.123234	0.197	-0.0126336	-0.0458381	-0.0763592	-0.219726	-0.132471	-0.0595951	-0.150133	-0.294905	-0.332973	-0.115854	-0.180045	-0.380839	-0.24367	-0.224667	-0.284122	-0.400074	-0.629034	-0.615006	-0.60671	-0.47638	-0.537158	-0.637323	-0.74848	-0.644938	-0.750728	-0.542456	-0.589084	-0.809367	-0.758192	-0.593697	-0.387581	-0.557777	-0.871624
Total phosphoglycerides	0.341967	-0.0907811	0.14199	0.268072	0.175021	0.263781	0.499491	0.232238	0.225537	0.0664521	0.261271	-0.0570986	0.238417	0.167356	0.159429	0.293703	0.0808108	0.0520662	-0.125859	0.211359	-0.13918	-0.0840677	-0.160834	-0.129664	-0.211224	0.405277	-0.504073	-0.246329	-0.52394	-0.544956	-0.562892	0.0321886	-0.588941	-0.220375	-0.558316	-0.259881	-0.0886136	-0.328041	-0.644046	-0.4069	-0.688044	-0.448755	-0.143896	-0.699807	-0.464441	-0.482367	-0.44242	-0.230064	-0.698958
Docosahexaenoic acid (DHA)	0.305501	0.0215305	0.0763993	0.249001	0.191831	0.244777	0.405317	0.281181	0.274049	0.198107	0.168242	-0.06588	0.143457	0.100436	0.0914303	0.184156	0.106933	0.0779294	-0.180207	0.0694594	-0.102482	-0.196748	-0.119102	-0.183619	-0.197686	0.309696	-0.390259	-0.231759	-0.416021	-0.431207	-0.455768	-0.104054	-0.674843	-0.352654	-0.502013	-0.241522	-0.159459	-0.410525	-0.729137	-0.386385	-0.76294	-0.492973	-0.269079	-0.78238	-0.546876	-0.52803	-0.658735	-0.252372	-0.79486
Omega-3 fatty acids (FAw3)	0.309538	0.0867852	0.145126	0.238728	0.24339	0.234913	0.44643	0.282217	0.275027	0.257291	0.155973	-0.0467844	0.13068	0.0959514	0.0866278	0.22771	0.0865765	0.0573701	-0.147368	0.00682958	-0.104758	-0.145199	-0.124531	-0.242988	-0.212258	0.240436	-0.351772	-0.250788	-0.384291	-0.391912	-0.422998	-0.176193	-0.671926	-0.410338	-0.517025	-0.287226	-0.229952	-0.478049	-0.732178	-0.458149	-0.764031	-0.450672	-0.332869	-0.785605	-0.567122	-0.488663	-0.605797	-0.346062	-0.789751
L-VLDL-FC	0.340901	0.486182	0.617515	0.198003	0.531008	0.197316	0.55844	0.246735	0.240725	0.455818	0.129463	0.199958	0.105978	0.123878	0.114388	0.406334	-0.0827215	-0.109527	0.066099	-0.316037	-0.129385	0.251724	-0.161385	-0.354405	-0.313563	-0.317198	-0.0280128	-0.371104	-0.0926943	-0.0611795	-0.12159	-0.416173	-0.453572	-0.635428	-0.530599	-0.478364	-0.643297	-0.663048	-0.56304	-0.729449	-0.5657	-0.216882	-0.638838	-0.613622	-0.610873	-0.267538	0.0172811	-0.759288	-0.612404
IL-18	0.508591	0.149397	0.435271	0.425135	0.33293	0.421983	0.413019	0.267639	0.262138	-0.139227	0.452298	0.274959	0.433681	0.386986	0.380446	0.319249	-0.0316053	-0.0623395	0.0688021	0.159165	-0.171008	0.0994572	-0.190395	0.0765988	-0.321583	-0.0175936	-0.33609	-0.358247	-0.362192	-0.385718	-0.405234	0.0536857	-0.27215	-0.203449	-0.661743	-0.558159	-0.325052	-0.240833	-0.402276	-0.499603	-0.415866	-0.53662	-0.266992	-0.467265	-0.602758	-0.581091	0.19409	-0.348361	-0.54529
S-HDL-P	0.481362	-0.255603	0.0500349	0.468252	0.0863754	0.462869	0.368485	0.321536	0.315757	-0.344871	0.479339	0.0707839	0.46093	0.373257	0.367514	0.177468	0.196759	0.166472	-0.126943	0.502037	-0.0739087	-0.177273	-0.0822806	0.191284	-0.136558	0.506474	-0.53921	-0.156136	-0.529953	-0.591997	-0.57904	0.41526	-0.385	0.069522	-0.553138	-0.258611	0.141765	0.0814603	-0.453947	-0.114975	-0.496561	-0.662945	0.0930443	-0.520652	-0.405959	-0.695343	-0.335649	0.137743	-0.604879
M-VLDL-FC	0.55908	0.300109	0.428229	0.472865	0.464556	0.46935	0.528569	0.4386	0.431427	0.158838	0.398746	0.285281	0.37272	0.353777	0.343936	0.324828	0.104432	0.0695319	0.041838	-0.00477483	-0.053726	0.0174729	-0.0756877	-0.117422	-0.24014	-0.0305141	-0.224148	-0.28799	-0.267762	-0.28014	-0.318254	-0.170515	-0.484989	-0.423223	-0.616393	-0.498785	-0.412793	-0.455176	-0.615868	-0.536738	-0.633373	-0.53669	-0.450651	-0.692111	-0.673272	-0.59444	-0.238781	-0.439431	-0.765709
IL-6	0.476573	0.334677	0.543654	0.359387	0.517234	0.357564	0.583222	0.338816	0.332475	0.278928	0.31243	0.239131	0.289019	0.276855	0.267975	0.439984	0.0308524	-0.000246625	0.0830721	0.00420426	-0.080771	0.213448	-0.110057	-0.0573237	-0.252083	-0.0643042	-0.179689	-0.303754	-0.212487	-0.230961	-0.257951	-0.114576	-0.425374	-0.395097	-0.514478	-0.369411	-0.381971	-0.410757	-0.538215	-0.596233	-0.554189	-0.373881	-0.418707	-0.604314	-0.586122	-0.427206	-0.0811453	-0.509702	-0.636712
Total fatty acids (FA)	0.573761	0.375755	0.449319	0.488688	0.529007	0.486005	0.5533	0.525987	0.519064	0.273957	0.370104	0.325313	0.343572	0.343089	0.332234	0.378812	0.205138	0.17157	0.0971488	-0.00261484	0.0587645	0.0729013	0.0391246	-0.166847	-0.130766	0.0240533	-0.149437	-0.180307	-0.19654	-0.205983	-0.247692	-0.236617	-0.471636	-0.41528	-0.494638	-0.355421	-0.352345	-0.465458	-0.599464	-0.502189	-0.615259	-0.465869	-0.41587	-0.678505	-0.603774	-0.528341	-0.372595	-0.451866	-0.762408
Saturated fatty acids (SFA)	0.593968	0.394018	0.495368	0.502784	0.552405	0.500262	0.574049	0.527718	0.520914	0.261796	0.394014	0.357126	0.367795	0.367681	0.356928	0.405373	0.195639	0.16194	0.125228	-0.00246064	0.0567722	0.114131	0.0359555	-0.159285	-0.138061	-0.00844238	-0.139328	-0.18909	-0.188033	-0.19638	-0.239238	-0.232647	-0.439526	-0.41121	-0.507489	-0.379496	-0.374706	-0.464295	-0.573932	-0.521369	-0.588572	-0.453636	-0.42255	-0.654413	-0.601739	-0.51764	-0.294832	-0.475647	-0.740537
L-HDL-PL	0.427554	0.517953	0.471548	0.342571	0.537159	0.341704	0.426799	0.461032	0.454745	0.473846	0.160207	0.277574	0.135103	0.177771	0.16703	0.271872	0.14912	0.120045	0.0194591	-0.195542	0.0558214	0.0942568	0.0409697	-0.152885	-0.144071	-0.198905	0.0728793	-0.19259	0.0283044	0.0242505	-0.0154993	-0.293818	-0.4894	-0.556554	-0.348154	-0.238511	-0.446278	-0.473969	-0.595333	-0.450587	-0.590695	-0.398541	-0.548188	-0.658207	-0.614425	-0.455077	-0.392959	-0.506018	-0.734375
VLDL cholesterol	0.553999	0.585051	0.557589	0.459732	0.624421	0.458241	0.484723	0.534986	0.528488	0.394865	0.302638	0.433827	0.276498	0.311586	0.300218	0.350765	0.144113	0.112034	0.150881	-0.198544	0.0676973	0.136089	0.0494936	-0.233859	-0.163939	-0.233959	0.0263653	-0.216812	-0.0364363	-0.0269128	-0.0834641	-0.420187	-0.415947	-0.550904	-0.459954	-0.419389	-0.533992	-0.567951	-0.563991	-0.587708	-0.559828	-0.420924	-0.576069	-0.638866	-0.660644	-0.487224	-0.256848	-0.594724	-0.738333
L-VLDL-FC_%	0.429243	0.540567	0.685129	0.287708	0.617092	0.287568	0.641182	0.347513	0.341964	0.477067	0.210816	0.281836	0.188258	0.216798	0.207415	0.49554	0.0288845	0.00262587	0.172099	-0.268307	-0.0132927	0.333835	-0.0457993	-0.325992	-0.201714	-0.312134	0.0488847	-0.261275	-0.0126499	0.0111013	-0.0455565	-0.3993	-0.364656	-0.578578	-0.449502	-0.420251	-0.596375	-0.615593	-0.481627	-0.672568	-0.486314	-0.150126	-0.599991	-0.540303	-0.538713	-0.20797	0.0272709	-0.749922	-0.552266
ApoB/ApoA1 ratio	0.503482	0.623974	0.508479	0.417565	0.608482	0.416284	0.420324	0.526982	0.520589	0.469276	0.233972	0.415796	0.208024	0.255115	0.243663	0.286503	0.13989	0.109604	0.12517	-0.274791	0.0785632	0.0870343	0.0632952	-0.253681	-0.154085	-0.281407	0.0830051	-0.204736	0.0181037	0.0330263	-0.0262785	-0.490432	-0.444864	-0.600993	-0.40553	-0.381455	-0.560088	-0.610069	-0.585333	-0.566131	-0.575697	-0.405144	-0.624784	-0.654864	-0.665269	-0.469036	-0.341529	-0.599045	-0.751676
Tyrosine	0.508891	0.663511	0.735074	0.391866	0.683532	0.39209	0.519753	0.45934	0.453946	0.378683	0.25601	0.432647	0.23346	0.290405	0.280293	0.435716	0.0732107	0.0446657	0.187638	-0.271983	0.0483456	0.326967	0.0248714	-0.258956	-0.184513	-0.39572	0.157338	-0.241261	0.0935253	0.111571	0.0547278	-0.397567	-0.266422	-0.575138	-0.43743	-0.480844	-0.60233	-0.520246	-0.411774	-0.622983	-0.399781	-0.28256	-0.609279	-0.477802	-0.608961	-0.346866	0.0600096	-0.709449	-0.560644
Phenylalanine	0.694921	0.429984	0.48063	0.643353	0.568257	0.640666	0.438857	0.625144	0.619091	0.0742072	0.513805	0.526777	0.49035	0.502047	0.492154	0.317607	0.256926	0.222667	0.17874	0.0773822	0.128426	0.0726073	0.117913	0.00621582	-0.0904721	-0.0684948	-0.0673599	-0.132663	-0.107096	-0.132709	-0.164726	-0.133875	-0.275224	-0.295412	-0.471562	-0.415971	-0.317231	-0.276	-0.435935	-0.39313	-0.438164	-0.579265	-0.355836	-0.523587	-0.606087	-0.646449	-0.213168	-0.317401	-0.681365
HbA1c	0.417037	0.663544	0.582077	0.318466	0.60944	0.318186	0.438228	0.437442	0.432408	0.480062	0.168844	0.423535	0.147033	0.20701	0.196892	0.357894	0.0717001	0.0486049	0.20946	-0.399268	0.075646	0.220395	0.0571955	-0.457242	-0.137881	-0.383127	0.17061	-0.188946	0.0872721	0.137308	0.0586833	-0.660427	-0.31289	-0.621262	-0.38216	-0.461797	-0.634669	-0.708721	-0.444618	-0.634895	-0.430436	-0.177843	-0.638467	-0.500582	-0.534746	-0.235865	-0.0985905	-0.721924	-0.56237
IL-6 response to C. Albicans	0.515283	0.206458	0.608073	0.415419	0.458139	0.413946	0.641815	0.325368	0.32105	-0.0324108	0.429954	0.2557	0.413423	0.397897	0.391955	0.473442	0.111863	0.0864333	0.133924	0.0920671	-0.00590984	0.317827	-0.0341866	-0.0704381	-0.133632	-0.0747581	-0.0912114	-0.179372	-0.120599	-0.131906	-0.155979	0.0919946	-0.142964	-0.226448	-0.492882	-0.42154	-0.298135	-0.168719	-0.24776	-0.374401	-0.269332	-0.243169	-0.260238	-0.311156	-0.360522	-0.292111	0.261625	-0.366693	-0.355154
L-HDL-PL_%	0.55642	0.603676	0.563919	0.472933	0.651598	0.472457	0.502481	0.584049	0.57821	0.465608	0.287276	0.422873	0.26304	0.315835	0.305126	0.364618	0.25044	0.220966	0.16197	-0.151902	0.171695	0.182654	0.156291	-0.112523	-0.0466195	-0.228835	0.147828	-0.0975434	0.102823	0.0921175	0.0532631	-0.303638	-0.368747	-0.496434	-0.293905	-0.235091	-0.431378	-0.437983	-0.497252	-0.424486	-0.492225	-0.356595	-0.52344	-0.571734	-0.567074	-0.423035	-0.330464	-0.508141	-0.674195
Pulse wave velocity (PWV), indirect	0.575323	0.610372	0.616988	0.483899	0.661638	0.482945	0.498066	0.512233	0.506936	0.372478	0.360938	0.522987	0.338841	0.377899	0.368653	0.327169	0.128161	0.0998663	0.218123	-0.23797	0.0939595	0.20925	0.073777	-0.126009	-0.135805	-0.407474	0.161648	-0.186363	0.1095	0.109031	0.0640298	-0.349152	-0.266087	-0.510072	-0.382753	-0.425236	-0.578054	-0.456571	-0.41471	-0.481895	-0.406716	-0.331336	-0.57457	-0.486701	-0.574553	-0.395674	-0.0623549	-0.497387	-0.586929
mean cell volume (MCV)	0.372614	-0.524476	-0.0803509	0.37219	-0.0655546	0.366937	0.382889	0.139079	0.135418	-0.499228	0.503611	-0.0728893	0.494653	0.370775	0.369983	0.229252	0.157786	0.137007	-0.0874306	0.68096	-0.0969866	-0.127583	-0.11071	0.309673	-0.0672435	0.667675	-0.6463	-0.0739569	-0.605584	-0.686624	-0.643863	0.625685	-0.2041	0.344124	-0.439656	-0.161522	0.377827	0.295295	-0.226756	0.0147253	-0.287937	-0.443388	0.370994	-0.275256	-0.134291	-0.456821	-0.14985	0.34159	-0.291334
M-HDL-PL	0.340225	0.580721	0.34486	0.286917	0.406221	0.285532	0.163989	0.292285	0.288563	0.342743	0.199052	0.42495	0.184344	0.226421	0.220415	-0.00196338	-0.0554366	-0.0720384	0.16	-0.513077	-0.0191462	-0.0594943	-0.0282308	-0.168303	-0.212875	-0.660291	0.22737	-0.243983	0.161404	0.201934	0.139779	-0.595675	-0.232279	-0.586376	-0.339303	-0.549679	-0.764134	-0.658995	-0.357052	-0.435408	-0.331731	-0.242649	-0.755174	-0.396801	-0.563669	-0.284402	0.0364691	-0.534899	-0.459257
M-VLDL-FC_%	0.718494	0.397431	0.539878	0.639399	0.619681	0.637032	0.671612	0.63132	0.625233	0.199541	0.546913	0.439678	0.52333	0.526098	0.51667	0.487034	0.328522	0.295572	0.248179	0.0957264	0.18187	0.171111	0.160111	-0.0558652	-0.00772816	-0.00924308	-0.0686547	-0.0578488	-0.104211	-0.132681	-0.161713	-0.131467	-0.301115	-0.29529	-0.433491	-0.359432	-0.298886	-0.344269	-0.442822	-0.404301	-0.4638	-0.396693	-0.354532	-0.533207	-0.511758	-0.467078	-0.233684	-0.399061	-0.632872
S-VLDL-P	0.723714	0.570134	0.572849	0.655193	0.6969	0.653808	0.570779	0.711992	0.706322	0.300623	0.496194	0.562037	0.472634	0.510101	0.499658	0.439987	0.362368	0.330681	0.297168	-0.00772119	0.263736	0.187255	0.248893	-0.0860124	0.0398506	-0.128128	0.0853447	-0.00958036	0.0396393	0.0210602	-0.0173902	-0.270342	-0.251638	-0.353485	-0.33043	-0.307735	-0.351856	-0.374729	-0.40854	-0.395674	-0.412094	-0.392291	-0.415087	-0.498949	-0.523542	-0.467469	-0.286723	-0.433662	-0.636694
HDL triglycerids	0.782762	0.465814	0.580354	0.711326	0.676604	0.709403	0.627202	0.699083	0.693485	0.1747	0.606678	0.573555	0.584228	0.595562	0.586062	0.495717	0.360833	0.327941	0.328127	0.135016	0.239653	0.21792	0.222059	0.024123	0.0304447	-0.0341554	-0.0265372	-0.0177517	-0.0609223	-0.0958032	-0.122083	-0.130492	-0.202792	-0.232286	-0.378708	-0.328605	-0.273046	-0.283556	-0.363662	-0.38009	-0.376771	-0.417886	-0.309467	-0.459478	-0.491319	-0.492587	-0.180321	-0.364232	-0.595623
Alanine	0.735932	0.601802	0.685959	0.653814	0.735506	0.653027	0.603922	0.686704	0.681496	0.233324	0.516501	0.594468	0.494388	0.536968	0.526977	0.502994	0.322238	0.291045	0.335556	-0.016533	0.245027	0.297237	0.227183	-0.106378	0.0148203	-0.194107	0.115903	-0.0373497	0.0659229	0.0538713	0.0119856	-0.253254	-0.157924	-0.346918	-0.366843	-0.382183	-0.389761	-0.344811	-0.32367	-0.443039	-0.324313	-0.349567	-0.416742	-0.413279	-0.511632	-0.425717	-0.0782768	-0.494273	-0.5523
Glycoprotein acetyls (Gp)	0.743076	0.646003	0.711927	0.656576	0.781382	0.656188	0.628557	0.702536	0.697517	0.308779	0.514112	0.619225	0.492255	0.54072	0.53078	0.535614	0.336633	0.306105	0.378587	-0.0249512	0.274848	0.340313	0.255392	-0.0902069	0.0409654	-0.221709	0.156736	-0.0126338	0.109672	0.0933069	0.0544645	-0.269686	-0.142776	-0.346581	-0.31179	-0.327781	-0.391082	-0.343635	-0.309853	-0.446228	-0.309323	-0.304282	-0.417181	-0.399888	-0.488332	-0.382167	-0.0889855	-0.500738	-0.535343
Monounsaturated fatty acids (MUFA)	0.753516	0.476262	0.571233	0.680945	0.688948	0.679478	0.679568	0.726915	0.721367	0.272952	0.549694	0.514415	0.526749	0.549083	0.539131	0.531783	0.434227	0.402986	0.322366	0.11622	0.305142	0.235768	0.286768	-0.0551225	0.110205	0.0192437	0.0261463	0.0600453	-0.00946882	-0.0396421	-0.0683974	-0.161059	-0.237139	-0.255213	-0.29986	-0.225207	-0.230679	-0.307613	-0.38022	-0.338983	-0.397422	-0.333469	-0.304635	-0.474222	-0.430447	-0.408733	-0.31139	-0.381302	-0.594203
Valine	0.659488	0.646096	0.762318	0.551619	0.772949	0.551891	0.684313	0.585482	0.580714	0.3917	0.441579	0.511815	0.421308	0.473008	0.464396	0.556562	0.245828	0.218145	0.333907	-0.133675	0.20567	0.400897	0.179369	-0.0721597	-0.0128214	-0.346119	0.207774	-0.0694193	0.16566	0.150846	0.116409	-0.269718	-0.158831	-0.430921	-0.305684	-0.356554	-0.479248	-0.393243	-0.304225	-0.465803	-0.305694	-0.188453	-0.496603	-0.383638	-0.47526	-0.26013	0.0306963	-0.579604	-0.464661
L-HDL-TG	0.716942	0.702247	0.629111	0.647791	0.766457	0.647497	0.527461	0.726692	0.721763	0.393734	0.470411	0.638191	0.448933	0.51052	0.500522	0.435701	0.352039	0.323219	0.369066	-0.0993692	0.308595	0.246992	0.294906	-0.0576073	0.0673478	-0.275653	0.219598	0.0183258	0.173419	0.156063	0.11791	-0.358676	-0.16876	-0.384534	-0.231071	-0.286	-0.412484	-0.393877	-0.332503	-0.4003	-0.324735	-0.318826	-0.476149	-0.419496	-0.506261	-0.395335	-0.220325	-0.484694	-0.563323
L-HDL-TG_%	0.718611	0.702601	0.630894	0.649453	0.768051	0.649176	0.529575	0.728359	0.723444	0.393829	0.472099	0.63943	0.450658	0.512412	0.502427	0.437803	0.354494	0.325697	0.370759	-0.0973558	0.310962	0.249548	0.297252	-0.0552389	0.0698518	-0.275337	0.221447	0.020794	0.175527	0.157808	0.119929	-0.355861	-0.166516	-0.382541	-0.228747	-0.283366	-0.410549	-0.390991	-0.330221	-0.39771	-0.322518	-0.317196	-0.474333	-0.417361	-0.503946	-0.393814	-0.21927	-0.48328	-0.56139
M-HDL-TG	0.751291	0.678054	0.647614	0.680735	0.770537	0.680303	0.555811	0.742781	0.737915	0.349214	0.516615	0.668821	0.495246	0.550083	0.540135	0.4605	0.37039	0.341025	0.390337	-0.0524092	0.318337	0.269319	0.304396	-0.0371529	0.0786946	-0.251271	0.198301	0.0291599	0.151831	0.133692	0.0954643	-0.314358	-0.142456	-0.344672	-0.246204	-0.28327	-0.393272	-0.364184	-0.311105	-0.38599	-0.305485	-0.323226	-0.439607	-0.401592	-0.483912	-0.401409	-0.176738	-0.46354	-0.551668
M-HDL-TG_%	0.752927	0.682323	0.650718	0.682434	0.773983	0.682048	0.557148	0.745331	0.74051	0.351662	0.517961	0.672707	0.496709	0.552445	0.542527	0.462717	0.373341	0.344129	0.395345	-0.0539543	0.322973	0.273387	0.309048	-0.0367958	0.0831417	-0.25535	0.204564	0.0335943	0.158069	0.14001	0.101772	-0.316305	-0.136903	-0.343586	-0.240971	-0.28094	-0.393704	-0.363353	-0.30576	-0.383644	-0.299926	-0.317829	-0.439802	-0.39628	-0.479948	-0.396183	-0.173469	-0.464394	-0.54664
Ankle brachial index (ABI)	0.508661	0.565489	0.653107	0.395243	0.625087	0.395867	0.683592	0.446376	0.442427	0.486889	0.329224	0.305848	0.312584	0.354413	0.3476	0.509671	0.2196	0.200422	0.327329	-0.229949	0.182061	0.338829	0.15504	-0.133646	0.0260059	-0.352382	0.22801	-0.0248983	0.188878	0.187271	0.152929	-0.353836	-0.19589	-0.450835	-0.220793	-0.29944	-0.509961	-0.532853	-0.295748	-0.388407	-0.304967	0.00358583	-0.578862	-0.357159	-0.381446	-0.054587	0.0245226	-0.654791	-0.37001
Isoleucine	0.819072	0.607092	0.711737	0.742479	0.786918	0.741908	0.665214	0.752031	0.74745	0.230922	0.623254	0.678072	0.603228	0.643844	0.634834	0.564077	0.404854	0.374919	0.442368	0.0634706	0.332631	0.354479	0.314285	0.00672871	0.107296	-0.190179	0.156086	0.0562002	0.11689	0.0887219	0.0582799	-0.187176	-0.0599692	-0.245774	-0.282777	-0.315361	-0.327614	-0.267209	-0.231118	-0.359943	-0.235108	-0.292284	-0.347466	-0.327296	-0.425636	-0.372288	-0.036072	-0.423914	-0.47355
high sensitivity C-reactive proteins (hsCRP)	0.830214	0.569215	0.659182	0.760213	0.755024	0.759266	0.611926	0.729796	0.725557	0.207083	0.671079	0.741281	0.652558	0.676602	0.668362	0.531882	0.372131	0.343138	0.489011	0.11959	0.31203	0.333963	0.296052	0.113231	0.0909882	-0.18205	0.0972995	0.0447436	0.0639878	0.0280767	0.00400612	-0.165275	-0.0284294	-0.163868	-0.267247	-0.278564	-0.304832	-0.24069	-0.206551	-0.343229	-0.208902	-0.312633	-0.284954	-0.302739	-0.401878	-0.390054	0.00490019	-0.34748	-0.455731
Eosinophils	0.862564	0.407654	0.605119	0.803659	0.68664	0.802129	0.711011	0.773949	0.769498	0.0640277	0.722847	0.626912	0.704096	0.713563	0.705372	0.582593	0.503208	0.473581	0.434198	0.28441	0.369702	0.305317	0.353878	0.0893167	0.188763	0.0603447	0.011299	0.143685	-0.0152286	-0.0578795	-0.0762148	-0.000193695	-0.0461856	-0.0579095	-0.278653	-0.230709	-0.120918	-0.138441	-0.200285	-0.239254	-0.221231	-0.314897	-0.165804	-0.301666	-0.321515	-0.391733	-0.105366	-0.266114	-0.447695
M-HDL-PL_%	0.635409	0.742673	0.5977	0.569529	0.703381	0.569323	0.434083	0.616551	0.612762	0.399749	0.432627	0.667866	0.415378	0.48093	0.472895	0.31212	0.240233	0.218049	0.402517	-0.302312	0.257666	0.20241	0.245	-0.100548	0.0233944	-0.534766	0.328493	-0.0205552	0.26814	0.280069	0.226576	-0.508162	-0.0880011	-0.456711	-0.220475	-0.398199	-0.60643	-0.519127	-0.251009	-0.395021	-0.232716	-0.201076	-0.618917	-0.323671	-0.474799	-0.269644	-0.0119819	-0.541022	-0.444621
Monocytes	0.811898	0.0342687	0.322949	0.800556	0.439908	0.797232	0.584824	0.669737	0.665682	-0.259288	0.78734	0.465969	0.772613	0.727082	0.721669	0.481449	0.507142	0.478563	0.303668	0.623636	0.299264	0.13534	0.289506	0.350841	0.191816	0.421265	-0.261475	0.165617	-0.248012	-0.332831	-0.312099	0.374124	-0.0281581	0.253647	-0.284634	-0.11943	0.231793	0.193321	-0.147891	-0.0139752	-0.186873	-0.457306	0.183664	-0.2435	-0.222447	-0.516536	-0.196342	0.129531	-0.38941
Resistin	0.792837	0.421742	0.381169	0.79887	0.560086	0.796503	0.358737	0.757653	0.753767	-0.0769182	0.669037	0.655376	0.653246	0.678663	0.671607	0.28343	0.461406	0.433938	0.34644	0.207048	0.350725	0.039876	0.350436	0.185452	0.156252	-0.052337	0.0794678	0.129193	0.0576773	0.0131504	-0.00100574	-0.0369754	0.00342137	-0.052646	-0.244821	-0.305456	-0.125426	-0.0497567	-0.158916	-0.0943149	-0.159043	-0.492517	-0.192365	-0.249609	-0.406309	-0.559922	-0.199999	-0.0868676	-0.451254
Glucose	0.622849	0.562767	0.794752	0.511413	0.768137	0.512652	0.802145	0.583442	0.579437	0.405582	0.40558	0.400014	0.387397	0.442636	0.434739	0.692175	0.351807	0.327907	0.343736	-0.014147	0.290611	0.533458	0.261245	-0.112434	0.118948	-0.177705	0.232056	0.0617216	0.202633	0.179403	0.156527	-0.135174	-0.103324	-0.324242	-0.188539	-0.182114	-0.287335	-0.256726	-0.215279	-0.360577	-0.227911	-0.0310817	-0.348055	-0.29113	-0.292257	-0.0994851	0.00548343	-0.525111	-0.345753
Serum Triglycerides	0.826903	0.619897	0.666457	0.761213	0.805271	0.761018	0.697551	0.831175	0.826795	0.322203	0.606181	0.660138	0.58619	0.638343	0.628962	0.588508	0.531299	0.503081	0.471701	0.0874319	0.448979	0.343282	0.432907	-0.027713	0.236949	-0.103246	0.210805	0.186682	0.175145	0.143243	0.115411	-0.208383	-0.0688853	-0.218583	-0.159075	-0.173355	-0.236383	-0.258114	-0.226083	-0.274225	-0.234402	-0.225329	-0.306624	-0.324071	-0.344153	-0.307743	-0.227324	-0.393656	-0.469335
Lactose	0.850755	0.578465	0.614366	0.794848	0.749095	0.793809	0.594088	0.784894	0.780873	0.179676	0.689873	0.756385	0.672003	0.702558	0.694292	0.51061	0.442331	0.414478	0.508964	0.107297	0.379675	0.28414	0.366715	0.0698663	0.16245	-0.150046	0.126799	0.118741	0.0890186	0.0593501	0.0303307	-0.216987	7.85394e-05	-0.150844	-0.22749	-0.277787	-0.283932	-0.259097	-0.17714	-0.295812	-0.181242	-0.295047	-0.27987	-0.274716	-0.372336	-0.374081	-0.0706661	-0.341668	-0.437211
IL-18pba	0.816033	0.689895	0.669261	0.767556	0.789932	0.767576	0.526149	0.790136	0.786504	0.22415	0.617191	0.755589	0.600441	0.664011	0.655954	0.461279	0.438095	0.41158	0.48338	0.0162827	0.403287	0.305599	0.393029	0.0997598	0.167928	-0.302997	0.295554	0.124673	0.262326	0.228501	0.204413	-0.214422	0.0454525	-0.218897	-0.162646	-0.287485	-0.326609	-0.207158	-0.12873	-0.251266	-0.1197	-0.292673	-0.374225	-0.221097	-0.405427	-0.371429	-0.0346476	-0.364389	-0.397247
M-VLDL-P	0.815703	0.674329	0.689017	0.750686	0.832719	0.751055	0.682845	0.846706	0.842666	0.366384	0.578125	0.683345	0.558802	0.624267	0.614815	0.59377	0.545993	0.519199	0.497166	0.050837	0.483625	0.373708	0.468713	-0.0545892	0.266906	-0.142743	0.275515	0.216502	0.237325	0.209744	0.179391	-0.251669	-0.0369423	-0.232528	-0.107799	-0.143752	-0.245636	-0.263391	-0.194221	-0.268923	-0.197889	-0.18333	-0.319423	-0.290379	-0.320594	-0.266559	-0.225537	-0.41671	-0.439669
Leucine	0.850952	0.565995	0.785011	0.767035	0.806113	0.767036	0.751235	0.733884	0.730312	0.16518	0.698374	0.697248	0.682061	0.716508	0.709258	0.659152	0.428187	0.401225	0.523715	0.139763	0.366595	0.477876	0.344406	0.0865592	0.163343	-0.191347	0.177394	0.112528	0.147937	0.111453	0.0911553	-0.0774967	0.0765187	-0.137644	-0.233947	-0.284226	-0.271264	-0.168598	-0.0895771	-0.302827	-0.0991964	-0.176	-0.262851	-0.185638	-0.304286	-0.255039	0.15763	-0.395162	-0.317096
Basophils	0.847004	0.443626	0.551282	0.818649	0.689771	0.818066	0.567675	0.841265	0.837812	0.0644605	0.683511	0.693248	0.667359	0.697864	0.689737	0.552397	0.590706	0.563906	0.468198	0.37168	0.479591	0.320745	0.474316	0.163203	0.300839	0.145575	0.0744537	0.264524	0.0596202	0.0031645	-0.00294432	0.0419755	0.0578651	0.0648303	-0.100778	-0.0346138	0.0509744	0.0273003	-0.0946473	-0.110888	-0.104304	-0.323247	-0.0139864	-0.193853	-0.222756	-0.398645	-0.212419	-0.135583	-0.384923
Pulse wave velocity (PWV), direct	0.635672	0.740024	0.733394	0.552283	0.787351	0.553318	0.554546	0.591308	0.588104	0.426116	0.429638	0.641036	0.41406	0.487162	0.480187	0.429116	0.247439	0.226114	0.409684	-0.24384	0.277688	0.389479	0.257228	-0.0216047	0.0531346	-0.548	0.41044	0.00458209	0.371581	0.358056	0.327229	-0.328237	-0.00363681	-0.409977	-0.144633	-0.31376	-0.530255	-0.330031	-0.151011	-0.334603	-0.13721	-0.106601	-0.526434	-0.222512	-0.386199	-0.174605	0.104728	-0.473424	-0.327115
Kreatinine	0.760316	0.202499	0.222251	0.782825	0.462954	0.779927	0.464981	0.720841	0.71696	-0.0334355	0.686396	0.456035	0.672634	0.672855	0.668197	0.288605	0.564162	0.538998	0.274655	0.360033	0.388829	-0.040763	0.385256	0.375015	0.261846	0.14071	0.0277161	0.240629	0.0509451	-0.0443174	-0.0149666	0.212487	-0.0754179	0.0726047	-0.116492	-0.121579	0.0850186	0.109806	-0.180043	0.13732	-0.205067	-0.436321	-0.0537674	-0.26781	-0.283394	-0.494663	-0.429567	0.138031	-0.413912
XL-HDL-TG_%	0.830194	0.722157	0.714526	0.767857	0.864637	0.768582	0.669139	0.849721	0.846077	0.390763	0.598894	0.727771	0.581172	0.654463	0.645806	0.58829	0.537444	0.511848	0.53973	0.0242651	0.498577	0.396997	0.483687	0.0138813	0.274539	-0.233283	0.338614	0.225244	0.306613	0.270615	0.247126	-0.254712	0.0180181	-0.228654	-0.0664587	-0.155084	-0.272576	-0.244576	-0.143554	-0.249842	-0.142684	-0.159516	-0.344857	-0.239117	-0.314346	-0.242949	-0.159729	-0.411741	-0.390481
VLDL Triglycerides	0.842374	0.67407	0.704419	0.779922	0.851808	0.780543	0.71436	0.874132	0.870481	0.360007	0.612434	0.704453	0.594333	0.661755	0.652764	0.627957	0.592134	0.566464	0.54081	0.0846326	0.531689	0.408677	0.516638	-0.027638	0.321357	-0.130605	0.304056	0.271461	0.269969	0.237553	0.211393	-0.221372	0.0152846	-0.186352	-0.0612213	-0.106388	-0.206885	-0.221859	-0.140549	-0.223701	-0.146195	-0.139677	-0.282069	-0.238445	-0.266817	-0.224153	-0.207031	-0.392167	-0.388929
XL-HDL-TG	0.828636	0.728105	0.717837	0.766116	0.867691	0.766906	0.669168	0.850542	0.846941	0.396122	0.595845	0.729471	0.578219	0.652958	0.644312	0.589256	0.538739	0.513346	0.542648	0.0186	0.502195	0.400996	0.487322	0.010348	0.277899	-0.239609	0.346972	0.22853	0.314624	0.279296	0.255442	-0.259716	0.0218308	-0.231228	-0.0608753	-0.152656	-0.275334	-0.246197	-0.139547	-0.248872	-0.138259	-0.152772	-0.347793	-0.234834	-0.311099	-0.236266	-0.157575	-0.415291	-0.385981
STDEV of PWV, direct	0.676341	0.704478	0.566761	0.646981	0.718756	0.648077	0.381959	0.728801	0.725955	0.358775	0.454426	0.680539	0.440482	0.525441	0.518258	0.344799	0.42292	0.40163	0.437168	-0.0399087	0.417229	0.255495	0.415411	0.126322	0.200755	-0.337982	0.390181	0.165776	0.373376	0.327193	0.318937	-0.231484	0.0308197	-0.224574	-0.0029114	-0.140997	-0.267834	-0.164576	-0.111549	-0.162958	-0.0913738	-0.247238	-0.36551	-0.188725	-0.343953	-0.315525	-0.151593	-0.310365	-0.356505
Leukocytes	0.924573	0.247867	0.45137	0.910911	0.592699	0.908722	0.612836	0.805842	0.802812	-0.153935	0.876165	0.698333	0.863278	0.846933	0.84137	0.539349	0.597411	0.571446	0.515665	0.531838	0.451105	0.249921	0.443981	0.352665	0.308765	0.228753	-0.0659934	0.279883	-0.0659937	-0.139399	-0.130842	0.210474	0.131572	0.243586	-0.160887	-0.0949423	0.124473	0.121238	-0.0201391	-0.00102529	-0.0463045	-0.340134	0.108887	-0.123971	-0.161079	-0.411066	-0.087189	0.0370746	-0.30256
Triglycerides	0.8962	0.615861	0.699403	0.839707	0.845676	0.840048	0.743931	0.897005	0.893656	0.273333	0.699015	0.740356	0.682234	0.737172	0.728903	0.655965	0.63087	0.605239	0.58013	0.182273	0.558155	0.424878	0.543155	0.0517093	0.358063	-0.0718625	0.266996	0.310281	0.24009	0.197536	0.178981	-0.128195	0.0772833	-0.0877093	-0.0537977	-0.0886698	-0.137362	-0.139137	-0.0815757	-0.165522	-0.0925138	-0.141888	-0.196283	-0.18402	-0.213397	-0.227067	-0.157919	-0.314788	-0.342088
%Eosinophils	0.90478	0.564416	0.698297	0.851638	0.812509	0.851838	0.759217	0.876192	0.872987	0.192792	0.731549	0.717767	0.715985	0.765561	0.758127	0.635792	0.627718	0.602473	0.55889	0.212443	0.542446	0.414967	0.527366	0.102122	0.352363	-0.0834235	0.264986	0.306009	0.243766	0.195569	0.182904	-0.0427265	0.10075	-0.0583887	-0.0742057	-0.128275	-0.125237	-0.0872047	-0.0508516	-0.129416	-0.064975	-0.150815	-0.197021	-0.152976	-0.207794	-0.233831	-0.0887816	-0.283129	-0.306648
L-VLDL-P	0.843281	0.704795	0.749428	0.774761	0.884657	0.775966	0.748687	0.881513	0.878264	0.395037	0.608358	0.717845	0.591251	0.665907	0.657139	0.67353	0.610851	0.586712	0.582399	0.0757177	0.565251	0.472626	0.548821	-0.042877	0.357567	-0.151989	0.351381	0.306223	0.317066	0.286506	0.260144	-0.231603	0.0594981	-0.178081	-0.0157195	-0.0734499	-0.203806	-0.216347	-0.0943159	-0.219588	-0.0995217	-0.0689738	-0.275441	-0.191387	-0.219633	-0.154494	-0.16485	-0.419132	-0.336092
Triglycerides to phosphoglycerides ratio	0.862149	0.731563	0.734926	0.806753	0.883464	0.807855	0.679322	0.893807	0.890854	0.345676	0.637519	0.780212	0.621624	0.700659	0.692369	0.61562	0.600614	0.576859	0.598346	0.0605127	0.570258	0.44077	0.557179	0.0132145	0.351324	-0.220462	0.386827	0.303527	0.353288	0.320756	0.295719	-0.233224	0.112138	-0.163737	-0.00822622	-0.110571	-0.226147	-0.18501	-0.0519402	-0.190031	-0.0506829	-0.107142	-0.288344	-0.149183	-0.236328	-0.192556	-0.118417	-0.379081	-0.31411
S-HDL-TG	0.846709	0.765522	0.736068	0.786936	0.891064	0.788225	0.671107	0.876935	0.874088	0.404065	0.621729	0.78652	0.60623	0.687813	0.679709	0.60697	0.576169	0.553624	0.615333	0.00714443	0.563534	0.442862	0.549848	0.0197948	0.342383	-0.276532	0.411202	0.294457	0.375985	0.346478	0.319742	-0.291266	0.108161	-0.194652	0.0120155	-0.111371	-0.274432	-0.240725	-0.0558234	-0.205653	-0.0523474	-0.0728844	-0.330722	-0.150768	-0.240474	-0.157563	-0.105224	-0.414901	-0.305965
XL-VLDL-P	0.805345	0.772449	0.821938	0.720874	0.927531	0.723032	0.781289	0.852172	0.849395	0.4876	0.555405	0.717337	0.539366	0.627201	0.618634	0.720558	0.58509	0.563441	0.621233	-0.00104023	0.573683	0.562111	0.554146	-0.101186	0.36543	-0.237812	0.428405	0.310788	0.389414	0.368649	0.337457	-0.297353	0.093727	-0.22292	0.0300926	-0.0549193	-0.259232	-0.263294	-0.0560648	-0.262316	-0.0575974	0.0422398	-0.319793	-0.147927	-0.181632	-0.0431383	-0.0844294	-0.508256	-0.273817
S-HDL-TG_%	0.849691	0.76789	0.740098	0.790297	0.895107	0.791665	0.674692	0.880718	0.877964	0.404492	0.625602	0.791074	0.610388	0.692911	0.684901	0.612652	0.583012	0.560765	0.623831	0.0108888	0.572207	0.450983	0.558545	0.0240401	0.35201	-0.277505	0.419137	0.304212	0.384592	0.35444	0.3284	-0.2876	0.11964	-0.187086	0.022397	-0.104081	-0.268592	-0.233188	-0.0440488	-0.198061	-0.0405875	-0.0630461	-0.324723	-0.139054	-0.229949	-0.147866	-0.0991418	-0.411888	-0.294487
Hematocriet	0.735261	0.85981	0.864572	0.642071	0.951255	0.644814	0.702692	0.768763	0.766239	0.535457	0.477543	0.720967	0.462585	0.563312	0.555227	0.681871	0.459231	0.438961	0.607127	-0.122265	0.498921	0.591159	0.477064	-0.0990449	0.273296	-0.398059	0.491241	0.218359	0.449751	0.435384	0.402101	-0.37306	0.115626	-0.303276	0.024558	-0.123772	-0.369439	-0.30249	-0.0388452	-0.346412	-0.0290077	0.0594484	-0.411113	-0.121327	-0.243443	-0.0221237	0.0376213	-0.573787	-0.238381
XXL-VLDL-P	0.655558	0.85694	0.884726	0.541412	0.926354	0.544762	0.747316	0.710114	0.707803	0.64151	0.38424	0.661868	0.369193	0.470746	0.462261	0.715565	0.430336	0.413066	0.60186	-0.196195	0.483854	0.646144	0.460074	-0.236384	0.275986	-0.398801	0.494185	0.217739	0.440064	0.448583	0.401516	-0.465478	0.0758974	-0.358876	0.0440905	-0.0677212	-0.412586	-0.414544	-0.0628386	-0.396293	-0.0543426	0.183658	-0.436243	-0.137869	-0.176904	0.105144	0.0471647	-0.68019	-0.221291
XXL-VLDL-FC	0.912917	0.631757	0.736038	0.858238	0.88191	0.859196	0.792085	0.90994	0.90718	0.29868	0.723741	0.74298	0.709229	0.77272	0.765593	0.708426	0.670647	0.646777	0.643302	0.206797	0.608419	0.485063	0.591835	0.0928677	0.416162	-0.10527	0.334262	0.368775	0.320246	0.262457	0.25709	-0.082742	0.149264	-0.0447198	0.0119441	-0.067263	-0.0984712	-0.0717726	-0.00342416	-0.122641	-0.0156503	-0.0697697	-0.171327	-0.105491	-0.156041	-0.155334	-0.107869	-0.299088	-0.255468
STDEV of PWV, indirect	0.65083	0.748098	0.584294	0.622227	0.724548	0.624244	0.334193	0.704177	0.702451	0.385835	0.442804	0.740044	0.432403	0.525862	0.519763	0.338192	0.407187	0.390627	0.500925	-0.0710953	0.447879	0.318052	0.448288	0.190514	0.237123	-0.419927	0.468347	0.20559	0.451555	0.410637	0.402692	-0.25436	0.138332	-0.182754	0.100508	-0.07142	-0.275234	-0.145915	-0.00193599	-0.115511	0.0256839	-0.147037	-0.343165	-0.0732277	-0.257585	-0.212401	-0.0358066	-0.304143	-0.239584
Heart rate	0.912986	0.555782	0.745934	0.855407	0.828147	0.85609	0.749433	0.814697	0.812838	0.175853	0.79681	0.82296	0.785738	0.823821	0.818577	0.663533	0.569541	0.54819	0.6703	0.254229	0.530937	0.527159	0.514366	0.258636	0.350012	-0.18487	0.294049	0.307197	0.284357	0.225657	0.225301	0.0363846	0.257374	0.0547117	-0.0101696	-0.0723264	-0.126675	0.012198	0.0968511	-0.0781217	0.0881813	-0.0587975	-0.106588	-0.00154266	-0.0917513	-0.138183	0.170556	-0.197048	-0.15226
XXL-VLDL-FC_%	0.908341	0.655148	0.763587	0.850421	0.905143	0.851872	0.81868	0.916139	0.913746	0.334273	0.714828	0.745788	0.701281	0.7717	0.764832	0.741551	0.69216	0.669893	0.67528	0.196061	0.641839	0.531186	0.624302	0.0786859	0.45413	-0.120968	0.37979	0.405974	0.366363	0.309722	0.30481	-0.0929894	0.183897	-0.038282	0.0599462	-0.0318084	-0.090834	-0.0665676	0.0353331	-0.108998	0.0231595	-0.00444237	-0.165684	-0.0654245	-0.110866	-0.0904356	-0.0883204	-0.316143	-0.208753
Neutrophils	0.969868	0.373526	0.571278	0.951572	0.718158	0.951248	0.702397	0.8886	0.88715	-0.0396075	0.907371	0.804366	0.898573	0.911038	0.906436	0.673069	0.713676	0.693123	0.712917	0.528068	0.620836	0.435014	0.612736	0.339838	0.482067	0.15474	0.122948	0.451446	0.12637	0.0509892	0.0634163	0.16547	0.317272	0.313287	0.0357783	0.0358189	0.167159	0.169048	0.16582	0.0595188	0.143269	-0.118687	0.152869	0.0611533	0.0139711	-0.195244	0.00711368	-0.00119446	-0.117114
IL-6 response to P. Gingivalis	0.176305	0.64349	0.405621	0.109149	0.464966	0.111391	0.100965	0.183016	0.182167	0.555107	0.0252071	0.39434	0.0189184	0.0881236	0.0846847	0.0215167	-0.0634796	-0.0679625	0.182478	-0.483835	0.0778491	0.202665	0.066574	0.15336	-0.0729568	-0.694077	0.447458	-0.0986361	0.416463	0.432912	0.405808	-0.379584	-0.0254249	-0.432386	0.14399	0.0424137	-0.586343	-0.370728	-0.101554	-0.209033	-0.0676016	0.0658543	-0.559022	-0.119143	-0.252483	0.0362037	0.119329	-0.378134	-0.147156
Liver fat	0.943981	0.547737	0.731069	0.899227	0.839536	0.900497	0.787076	0.919457	0.91793	0.177685	0.802441	0.795859	0.791857	0.842847	0.837095	0.71408	0.7389	0.719018	0.688295	0.338746	0.673572	0.549288	0.661348	0.254059	0.511446	-0.030455	0.341619	0.47009	0.335782	0.273044	0.275921	0.0809938	0.28672	0.12785	0.1182	0.0907783	0.0182921	0.0800583	0.142538	0.0533037	0.127369	-0.00728736	-0.0188208	0.039802	0.00281409	-0.0901588	0.00462633	-0.160091	-0.122806
XXL-VLDL-PL	0.809126	0.395126	0.73269	0.731301	0.778668	0.732763	0.985389	0.752259	0.750575	0.247065	0.693812	0.506308	0.683864	0.717354	0.712917	0.863527	0.673404	0.655814	0.630209	0.337906	0.58344	0.620199	0.55571	0.0580757	0.480377	0.0791514	0.241903	0.432885	0.244953	0.183872	0.193188	0.115624	0.197713	0.0939925	0.0566127	0.0496079	0.0655929	0.0336213	0.0996544	-0.0508498	0.0617979	0.183272	0.00976036	0.0104178	0.0798477	0.110125	0.023393	-0.263965	-0.051121
MUFA/FA ratio	0.949155	0.580855	0.692721	0.920497	0.863719	0.92197	0.781546	0.976998	0.975649	0.211392	0.790634	0.786981	0.780649	0.847654	0.841948	0.723782	0.812663	0.79382	0.715394	0.328739	0.751853	0.520426	0.740516	0.189776	0.591013	-0.00357504	0.398663	0.551368	0.395388	0.329275	0.334282	0.0305496	0.310242	0.133398	0.183534	0.0997971	0.0753138	0.0937286	0.169852	0.0857465	0.154228	0.0259396	-0.00742144	0.0670955	0.033376	-0.0582983	-0.113153	-0.146191	-0.0997048
XS-VLDL-TG_%	0.973042	0.472313	0.578653	0.970874	0.779301	0.971354	0.699619	0.97507	0.973936	0.0500103	0.863603	0.805084	0.855272	0.903078	0.898366	0.645648	0.82184	0.802901	0.701496	0.432632	0.740923	0.41814	0.734855	0.289516	0.593144	0.0762999	0.313306	0.562105	0.318886	0.241709	0.255698	0.124978	0.348169	0.247696	0.161166	0.0817922	0.162628	0.196551	0.205572	0.168356	0.187262	-0.0640394	0.0921349	0.101494	0.0465387	-0.144342	-0.123045	0.00571271	-0.0859484
XS-VLDL-TG	0.971953	0.472565	0.576907	0.970703	0.778607	0.971215	0.697463	0.976104	0.975013	0.0497068	0.862512	0.804793	0.854325	0.902872	0.898206	0.644415	0.82504	0.806276	0.702508	0.433252	0.744725	0.418104	0.738869	0.29047	0.597651	0.076322	0.317745	0.566866	0.32372	0.246292	0.260654	0.126469	0.35207	0.250426	0.166839	0.0857676	0.166297	0.200882	0.210125	0.173808	0.191945	-0.0611343	0.0946319	0.106264	0.0506707	-0.141317	-0.124505	0.00892197	-0.081501
S-LDL-TG_%	0.999875	0.421693	0.619768	0.984723	0.773749	0.985007	0.753085	0.926554	0.925604	-0.0115172	0.934106	0.817292	0.927077	0.955882	0.952202	0.690972	0.771992	0.753084	0.735678	0.47918	0.692161	0.46999	0.681613	0.367952	0.552455	0.0621918	0.254844	0.520657	0.265376	0.182262	0.201836	0.19358	0.392322	0.298222	0.113107	0.0331085	0.146984	0.217211	0.245151	0.148004	0.221908	-0.0437236	0.119611	0.139905	0.061374	-0.122802	0.0424474	0.00787227	-0.0332643
VLDL diameter	0.894619	0.730026	0.788653	0.84676	0.940088	0.849565	0.778338	0.961861	0.960969	0.360878	0.690877	0.819971	0.681176	0.775201	0.768888	0.761573	0.771257	0.754983	0.765043	0.177481	0.768169	0.619404	0.755081	0.0580572	0.589514	-0.143656	0.52127	0.545005	0.502773	0.459029	0.448753	-0.140956	0.339025	0.0281233	0.238388	0.109446	-0.0351943	-0.014258	0.194785	-0.0114198	0.190008	0.143787	-0.102809	0.0986079	0.0423414	0.0576819	-0.0507897	-0.297613	-0.058458
[truncated: 242 more columns]

## Sheet: SuppTable 2C
Supplementary Table 2C
	Parameter	Association with the IM1 state, obesity	Association with the IM2 state, obesity	Association with the IM1 state, Normal BMI	Association with the IM2 state, Normal BMI	Association with MetS
IM1 negative markers	S-VLDL-L	-0.930221	0.146704	-0.842194	0.338567	-2.62458
	XS-VLDL-L	-0.904569	-0.178724	-0.86063	-0.253988	-3.79633
	M-VLDL-C	-0.891724	0.209752	-0.85919	0.336693	-0.751686
	IDL-FC	-0.853851	0.190956	-0.856309	0.0974839	-2.84083
	IDL-L	-0.85011	0.116512	-0.849222	-0.00859969	-2.69842
	S-VLDL-CE	-0.84618	0.207345	-0.851154	0.285846	-1.99812
IM1 positive markers	IDL-TG	0.783652	0.00701561	0.750892	0.0831179	1.85232
	L-LDL-TG	0.675939	-0.0989668	0.658603	0.062152	1.7183
	S-LDL-TG	0.825646	0.161473	0.658539	0.33998	3.67417
	VLDL-D	0.903797	0.0980795	0.753249	0.047167	4.56232
	S-VLDL-TG	0.941525	-0.0779288	0.850154	-0.254996	3.12404
	XS-VLDL-TG	0.916205	0.0488186	0.891466	0.0723249	2.71301
IM2 negative markers	M-LDL-FC	-0.0882933	-0.920165	0.105726	-0.92441	-1.6445
	S-LDL-FC	-0.123719	-0.879638	0.0727353	-0.903099	-2.16524
	S-HDL-PL	0.190813	-0.848161	0.387764	-0.713011	-9.74388e-05
	L-LDL-PL	0.0717663	-0.842755	0.237757	-0.888708	-1.33233
	S-HDL-FC	-0.00942911	-0.79164	-0.0235132	-0.494199	-0.515402
	S-LDL-PL	0.290148	-0.879763	0.39791	-0.852089	-7.89535e-05
IM2 positive markers	LDL-C	-0.203873	0.923692	-0.344894	0.887587	0.254319
	Serum C	-0.167289	0.908926	-0.269612	0.892196	0.413842
	S-LDL-P	-0.0855132	0.930626	-0.209307	0.901797	0.64749
	M-LDL-P	-0.0718195	0.926255	-0.226393	0.92369	0.639699
	IDL-P	-0.154268	0.932557	-0.265545	0.921055	0.564472
	L-LDL-P	-0.149876	0.938399	-0.269471	0.923428	0.497602

## Sheet: SuppTable 2D
Supplementary Table 2D
Source	Functional annotation (geneset)	Assocition of IM1 state with functional annotation (signed q-value)	Assocition of IM2 state with functional annotation (signed q-value)
GO	RNA_METABOLIC_PROCESS	8.48286e-08	-1.17648e-07
GO	RNA_BINDING	8.48286e-08	-8.33267e-07
GO	NCRNA_PROCESSING	8.48286e-08	-7.87624e-06
GO	NCRNA_METABOLIC_PROCESS	8.48286e-08	-1.86064e-05
REACTOME	METABOLISM_OF_RNA	8.48286e-08	-0.267015
GO	MITOCHONDRIAL_MATRIX	8.48286e-08	-1
GO	MITOCHONDRIAL_PART	8.48286e-08	-1
GO	MITOCHONDRION	8.48286e-08	-1
MSIGDB, HALLMARK	TNFA_SIGNALING_VIA_NFKB	-8.48286e-08	-1
REACTOME	TRANSLATION	8.48286e-08	-1
MSIGDB, HALLMARK	MYC_TARGETS_V1	3.66998e-07	-1
MSIGDB, HALLMARK	E2F_TARGETS	1.20454e-06	-1
MSIGDB, HALLMARK	MYC_TARGETS_V2	1.71643e-06	-0.811227
GO	RIBOSOME_BIOGENESIS	2.11388e-06	-0.00143894
GO	RRNA_METABOLIC_PROCESS	7.23026e-06	-0.00107976
GO	DNA_BINDING_TRANSCRIPTION_FACTOR_ACTIVITY	-1.21512e-05	-5.55143e-08
REACTOME	TCA_CYCLE_AND_RESPIRATORY_ELECTRON_TRANSPORT	1.2767e-05	5.55143e-08
REACTOME	MRNA_SPLICING	1.6475e-05	-0.606544
GO	RIBONUCLEOPROTEIN_COMPLEX_BIOGENESIS	2.76127e-05	-1.34834e-05
REACTOME	DNA_REPLICATION	2.82849e-05	0.883049
GO	MITOCHONDRIAL_TRANSLATION	3.0304e-05	-1
GO	LIGASE_ACTIVITY_FORMING_CARBON_OXYGEN_BONDS	3.25131e-05	-0.789593
GO	PRERIBOSOME	4.75722e-05	-0.0836092
GO	TRNA_METABOLIC_PROCESS	5.64491e-05	-0.0124179
KEGG	CITRATE_CYCLE_TCA_CYCLE	0.00012054	-1
GO	LIGASE_ACTIVITY	0.000120557	-0.210823
REACTOME	RRNA_PROCESSING	0.000120557	-0.919249
REACTOME	PROCESSING_OF_CAPPED_INTRON_CONTAINING_PRE_MRNA	0.000136643	-0.158446
REACTOME	TRNA_AMINOACYLATION	0.000143557	-0.937591
MSIGDB, HALLMARK	INTERFERON_ALPHA_RESPONSE	-0.0001763	0.000203202
GO	AMINO_ACID_ACTIVATION	0.000180275	-0.882379
GO	RIBONUCLEOPROTEIN_COMPLEX	0.00021206	-0.191641
GO	UBIQUITIN_LIKE_PROTEIN_TRANSFERASE_ACTIVITY	-0.000212963	-0.00277318
REACTOME	GLUCONEOGENESIS	0.00023161	0.0813489
REACTOME	RRNA_PROCESSING_IN_THE_NUCLEUS_AND_CYTOSOL	0.000315782	-0.914735
KEGG	GLYCOLYSIS_GLUCONEOGENESIS	0.000320787	0.0789263
REACTOME	G1_S_TRANSITION	0.000320787	0.827294
REACTOME	CITRIC_ACID_CYCLE_TCA_CYCLE	0.000331766	-1
GO	MITOCHONDRIAL_GENE_EXPRESSION	0.000344046	-0.900762
GO	INNER_MITOCHONDRIAL_MEMBRANE_PROTEIN_COMPLEX	0.00044175	5.55143e-08
REACTOME	SYNTHESIS_OF_DNA	0.000448581	0.380102
GO	CELLULAR_AMINO_ACID_METABOLIC_PROCESS	0.000512119	-1
GO	90S_PRERIBOSOME	0.000599448	-0.0520237
GO	DNA_METABOLIC_PROCESS	0.000618884	-0.321063
GO	SPLICEOSOMAL_SNRNP_ASSEMBLY	0.000808834	-1
GO	TRANSLATIONAL_TERMINATION	0.000808834	1
KEGG	AMINOACYL_TRNA_BIOSYNTHESIS	0.000809147	-0.762436
GO	CATALYTIC_ACTIVITY_ACTING_ON_RNA	0.00101489	-0.00263947
GO	UBIQUITIN_LIKE_PROTEIN_LIGASE_ACTIVITY	-0.00103592	-0.00717238
GO	COENZYME_BINDING	0.00119397	-1
REACTOME	DNA_REPLICATION_PRE_INITIATION	0.00135822	0.0077963
GO	REGULATION_OF_CELLULAR_COMPONENT_MOVEMENT	-0.00135822	-1
KEGG	DNA_REPLICATION	0.00151492	0.566881
GO	ORGANIC_ACID_METABOLIC_PROCESS	0.00151492	-1
GO	RNA_SPLICING_VIA_TRANSESTERIFICATION_REACTIONS	0.00155661	-0.0127724
GO	ADENYL_NUCLEOTIDE_BINDING	0.00155661	-0.0507327
REACTOME	EXTENSION_OF_TELOMERES	0.00162742	1
MSIGDB, HALLMARK	UNFOLDED_PROTEIN_RESPONSE	0.00170987	-0.382207
REACTOME	MITOCHONDRIAL_PROTEIN_IMPORT	0.00170987	-1
GO	RNA_SPLICING	0.0017966	-0.0195519
REACTOME	RESPIRATORY_ELECTRON_TRANSPORT_ATP_SYNTHESIS_BY_CHEMIOSMOTIC_COUPLING_AND_HEAT_PRODUCTION_BY_UNCOUPLING_PROTEINS	0.00210968	5.55143e-08
GO	OXIDATIVE_PHOSPHORYLATION	0.002227	5.55143e-08
REACTOME	M_G1_TRANSITION	0.00223242	0.034774
REACTOME	DNA_STRAND_ELONGATION	0.00257118	0.748488
GO	MITOCHONDRIAL_ENVELOPE	0.00268517	-1
GO	SMALL_MOLECULE_METABOLIC_PROCESS	0.00269204	-1
GO	RIBOSOMAL_LARGE_SUBUNIT_BIOGENESIS	0.00273833	-0.882095
GO	AEROBIC_RESPIRATION	0.00294626	0.32997
GO	PRERIBOSOME_LARGE_SUBUNIT_PRECURSOR	0.00308827	-0.840558
GO	NAD_BINDING	0.00313004	-1
REACTOME	CYTOSOLIC_TRNA_AMINOACYLATION	0.00330517	-1
MSIGDB, HALLMARK	ANDROGEN_RESPONSE	-0.0034425	-0.931681
GO	TRICARBOXYLIC_ACID_CYCLE	0.00364651	-1
REACTOME	NUCLEOTIDE_EXCISION_REPAIR	0.00364651	-1
GO	ORGANELLAR_RIBOSOME	0.00385842	0.572411
GO	ATPASE_COMPLEX	0.00403953	-0.0913191
GO	COFACTOR_BINDING	0.00406234	-1
REACTOME	SIGNALING_BY_BMP	-0.00432461	-0.413184
KEGG	CYTOKINE_CYTOKINE_RECEPTOR_INTERACTION	-0.00451541	-1
REACTOME	MITOCHONDRIAL_TRANSLATION	0.00456525	0.727491
GO	MITOCHONDRIAL_TRANSLATIONAL_TERMINATION	0.00457817	0.674345
GO	RESPIRATORY_ELECTRON_TRANSPORT_CHAIN	0.00468136	5.55143e-08
GO	LARGE_RIBOSOMAL_SUBUNIT	0.00468136	0.00629439
GO	BASE_EXCISION_REPAIR	0.00468136	-1
REACTOME	CELL_CYCLE	0.00468136	-1
GO	CELLULAR_RESPONSE_TO_NITROGEN_COMPOUND	-0.00480231	-1
GO	OXIDOREDUCTASE_ACTIVITY_ACTING_ON_THE_CH_CH_GROUP_OF_DONORS	0.0048435	-1
GO	CATALYTIC_ACTIVITY_ACTING_ON_DNA	0.00529029	-0.0753612
GO	CHROMOSOME	0.00543972	-0.00294965
GO	MRNA_METABOLIC_PROCESS	0.00551446	-0.00197554
GO	PHOSPHOLIPID_TRANSLOCATING_ATPASE_ACTIVITY	-0.00589676	-0.581146
GO	REGULATION_OF_NUCLEOTIDE_BINDING_OLIGOMERIZATION_DOMAIN_CONTAINING_SIGNALING_PATHWAY	-0.00589676	-0.915921
GO	POSITIVE_REGULATION_OF_TRANSFORMING_GROWTH_FACTOR_BETA_PRODUCTION	-0.00600148	-1
GO	CATALYTIC_ACTIVITY_ACTING_ON_A_TRNA	0.00608854	-0.0620532
GO	NUCLEAR_CHROMOSOME	0.00634014	-0.0415631
GO	GDP_BINDING	-0.00634014	-1
REACTOME	MRNA_PROCESSING	0.00636267	-0.230344
GO	CHAPERONE_COMPLEX	0.00657789	-0.857607
REACTOME	DNA_REPAIR	0.00657789	-0.95041
REACTOME	GLOBAL_GENOME_NUCLEOTIDE_EXCISION_REPAIR_GG_NER	0.00657789	-1
REACTOME	RRNA_MODIFICATION_IN_THE_NUCLEUS_AND_CYTOSOL	0.0066116	-0.0619296
REACTOME	PEPTIDE_CHAIN_ELONGATION	0.00666504	9.23197e-07
GO	NUCLEOLUS	0.00666601	-0.000898084
REACTOME	ASPARAGINE_N_LINKED_GLYCOSYLATION	0.00676099	-1
GO	NUCLEOID	0.00709322	-0.63835
MSIGDB, HALLMARK	IL6_JAK_STAT3_SIGNALING	-0.00709322	0.774229
REACTOME	IRE1ALPHA_ACTIVATES_CHAPERONES	0.00709322	-1
GO	RESPIRASOME	0.00725917	5.55143e-08
REACTOME	PYRUVATE_METABOLISM_AND_CITRIC_ACID_TCA_CYCLE	0.00725917	-1
GO	PROTEIN_MODIFICATION_BY_SMALL_PROTEIN_CONJUGATION_OR_REMOVAL	-0.00801235	-0.000980772
REACTOME	SWITCHING_OF_ORIGINS_TO_A_POST_REPLICATIVE_STATE	0.00801235	0.429634
REACTOME	EUKARYOTIC_TRANSLATION_INITIATION	0.0080974	0.424938
REACTOME	RESPIRATORY_ELECTRON_TRANSPORT	0.00813672	2.52086e-07
GO	TELOMERE_MAINTENANCE_VIA_SEMI_CONSERVATIVE_REPLICATION	0.00860072	0.70741
GO	REGULATION_OF_IMMUNE_SYSTEM_PROCESS	-0.00860072	-1
GO	RRNA_TRANSCRIPTION	0.00860072	-1
GO	WHOLE_MEMBRANE	-0.00860072	-1
MSIGDB, HALLMARK	KRAS_SIGNALING_UP	-0.00866456	-1
REACTOME	NONSENSE_MEDIATED_DECAY_NMD_INDEPENDENT_OF_THE_EXON_JUNCTION_COMPLEX_EJC	0.00867625	0.000527794
GO	RIBONUCLEOTIDE_BINDING	0.00871191	-0.122884
GO	RNA_MODIFICATION	0.00921307	-0.00125343
REACTOME	INFLUENZA_VIRAL_RNA_TRANSCRIPTION_AND_REPLICATION	0.00925837	5.14639e-06
GO	POSITIVE_REGULATION_OF_MULTICELLULAR_ORGANISMAL_PROCESS	-0.00925837	-1
GO	CHROMATIN_DISASSEMBLY	0.00942807	-1
GO	TRNA_TRANSCRIPTION	0.00952825	-0.882906
GO	POSITIVE_REGULATION_OF_MEIOSIS_I	-0.00952825	0.915921
REACTOME	RESOLUTION_OF_ABASIC_SITES_AP_SITES	0.00955703	-1
GO	MYOBLAST_DIFFERENTIATION	-0.00994479	-1
KEGG	PARKINSONS_DISEASE	0.0101675	5.55143e-08
GO	TRNA_PROCESSING	0.0101675	-0.0159171
GO	RIBONUCLEOSIDE_TRIPHOSPHATE_BIOSYNTHETIC_PROCESS	0.0104193	0.000386471
GO	4_IRON_4_SULFUR_CLUSTER_BINDING	0.0104193	-1
GO	U2_TYPE_SPLICEOSOMAL_COMPLEX	0.0111363	-1
GO	VESICLE_ORGANIZATION	-0.0112113	-1
REACTOME	ACTIVATION_OF_CHAPERONE_GENES_BY_XBP1S	0.0114002	-1
GO	SOMITOGENESIS	-0.0115776	-0.334591
GO	NURD_COMPLEX	0.0116518	-0.811227
GO	TELOMERE_ORGANIZATION	0.0116518	-0.987825
GO	DNA_DEPENDENT_DNA_REPLICATION	0.0116518	-1
GO	NUCLEAR_DNA_REPLICATION	0.0116518	-1
REACTOME	ACTIVATION_OF_THE_PRE_REPLICATIVE_COMPLEX	0.0116518	-1
GO	RESPIRATORY_CHAIN_COMPLEX	0.0116914	5.55143e-08
REACTOME	ORC1_REMOVAL_FROM_CHROMATIN	0.0117049	0.0238346
GO	REGULATION_OF_RESPONSE_TO_STRESS	-0.0117082	-1
GO	DNA_REPLICATION_INITIATION	0.0118391	-1
GO	PEPTIDE_BIOSYNTHETIC_PROCESS	0.0121852	-0.740131
GO	MYD88_INDEPENDENT_TOLL_LIKE_RECEPTOR_SIGNALING_PATHWAY	-0.0121852	-1
REACTOME	S_PHASE	0.0121852	-1
REACTOME	INTERFERON_ALPHA_BETA_SIGNALING	-0.012349	0.135944
GO	POSITIVE_REGULATION_OF_CELL_DIFFERENTIATION	-0.012349	-1
REACTOME	PROTEIN_LOCALIZATION	0.0127856	-1
GO	IRE1_MEDIATED_UNFOLDED_PROTEIN_RESPONSE	0.0129762	-1
GO	POSITIVE_REGULATION_OF_DEVELOPMENTAL_PROCESS	-0.0129762	-1
GO	ATP_SYNTHESIS_COUPLED_ELECTRON_TRANSPORT	0.0132533	5.55143e-08
REACTOME	GLUCOSE_METABOLISM	0.0137416	-1
REACTOME	OXYGEN_DEPENDENT_PROLINE_HYDROXYLATION_OF_HYPOXIA_INDUCIBLE_FACTOR_ALPHA	-0.0138936	1
GO	DNA_REPAIR	0.0139762	-0.508441
GO	MUSCLE_TISSUE_DEVELOPMENT	-0.0141699	-1
GO	DRUG_BINDING	0.0146718	-0.175483
GO	INTRINSIC_COMPONENT_OF_ORGANELLE_MEMBRANE	0.0149297	-1
GO	RESPONSE_TO_NITROGEN_COMPOUND	-0.0151248	-1
GO	MITOTIC_CELL_CYCLE	0.0151637	-0.873209
REACTOME	CELL_CYCLE_MITOTIC	0.0151711	-1
REACTOME	THE_ROLE_OF_GTSE1_IN_G2_M_PROGRESSION_AFTER_G2_CHECKPOINT	0.0151801	7.63519e-06
MSIGDB, HALLMARK	G2M_CHECKPOINT	0.0151801	-1
GO	STRIATED_MUSCLE_CELL_PROLIFERATION	-0.0153293	-1
GO	NITRIC_OXIDE_SYNTHASE_BIOSYNTHETIC_PROCESS	-0.0153465	0.98419
GO	ANAPHASE_PROMOTING_COMPLEX_DEPENDENT_CATABOLIC_PROCESS	0.0162084	0.101086
GO	CHROMOSOME_TELOMERIC_REGION	0.0162084	-0.350838
GO	TOLL_LIKE_RECEPTOR_SIGNALING_PATHWAY	-0.0162084	0.788841
GO	MEMBRANE_FISSION	-0.0162084	-1
GO	ORGANELLAR_SMALL_RIBOSOMAL_SUBUNIT	0.0162084	1
GO	ANTERIOR_POSTERIOR_PATTERN_SPECIFICATION	-0.0162593	-0.136686
REACTOME	REGULATION_OF_MITOTIC_CELL_CYCLE	0.0162593	0.300751
GO	RESPONSE_TO_PEPTIDE	-0.0162593	-1
KEGG	BASE_EXCISION_REPAIR	0.0162593	-1
GO	NCRNA_TRANSCRIPTION	0.0163325	-0.362088
REACTOME	METABOLISM_OF_CARBOHYDRATES	0.0163325	-1
GO	POSITIVE_REGULATION_OF_NITRIC_OXIDE_SYNTHASE_BIOSYNTHETIC_PROCESS	-0.0163987	0.338861
REACTOME	MITOTIC_M_M_G1_PHASES	0.0163987	-1
MSIGDB, HALLMARK	FATTY_ACID_METABOLISM	0.0167549	-1
GO	SWI_SNF_SUPERFAMILY_TYPE_COMPLEX	0.0173729	-0.0447743
GO	PROTEIN_CONTAINING_COMPLEX_ASSEMBLY	0.0175031	-1
REACTOME	MITOTIC_G2_G2_M_PHASES	0.0175717	-1
GO	SEGMENTATION	-0.0176492	-0.210678
GO	EPITHELIAL_CILIUM_MOVEMENT_INVOLVED_IN_DETERMINATION_OF_LEFT_RIGHT_ASYMMETRY	-0.0176492	-0.591832
GO	MITOCHONDRIAL_TRANSPORT	0.0178234	-1
GO	OLIGOSACCHARIDE_LIPID_INTERMEDIATE_BIOSYNTHETIC_PROCESS	0.0180682	-0.915921
REACTOME	TELOMERE_C_STRAND_LAGGING_STRAND_SYNTHESIS	0.0180849	0.930831
GO	CELLULAR_RESPONSE_TO_PEPTIDE	-0.0186754	-1
REACTOME	3_UTR_MEDIATED_TRANSLATIONAL_REGULATION	0.0186786	0.265192
GO	REGULATION_OF_SECRETION	-0.0188794	-1
REACTOME	OXIDATIVE_STRESS_INDUCED_SENESCENCE	-0.0190327	-1
REACTOME	ASSEMBLY_OF_THE_PRE_REPLICATIVE_COMPLEX	0.0200173	0.00184706
GO	2_OXOGLUTARATE_METABOLIC_PROCESS	0.0200173	-1
GO	PYRIMIDINE_RIBONUCLEOSIDE_TRIPHOSPHATE_BIOSYNTHETIC_PROCESS	0.0200173	-1
REACTOME	ACTIVATION_OF_ATR_IN_RESPONSE_TO_REPLICATION_STRESS	0.0204734	-0.939095
GO	COFACTOR_METABOLIC_PROCESS	0.0204734	-1
KEGG	SPLICEOSOME	0.0216077	-0.437777
GO	SUGAR_MEDIATED_SIGNALING_PATHWAY	0.0216077	0.956982
GO	ENDOSOME	-0.0217247	-1
KEGG	PYRUVATE_METABOLISM	0.0217247	-1
GO	SMALL_RIBOSOMAL_SUBUNIT	0.0217247	1
GO	CELLULAR_RESPONSE_TO_INSULIN_STIMULUS	-0.0229545	-1
GO	CELLULAR_AMIDE_METABOLIC_PROCESS	0.0231971	-1
GO	REGULATION_OF_CELL_CYCLE_PHASE_TRANSITION	0.0232411	-1
REACTOME	ACTIVATION_OF_APC_C_AND_APC_C:CDC20_MEDIATED_DEGRADATION_OF_MITOTIC_PROTEINS	0.0236658	0.0304138
GO	OVULATION	-0.0248541	-1
KEGG	OXIDATIVE_PHOSPHORYLATION	0.0258241	5.55143e-08
GO	TRANSFORMING_GROWTH_FACTOR_BETA_PRODUCTION	-0.0258241	-1
REACTOME	GLOBAL_GENOMIC_NER_GG_NER	0.0258691	-0.982497
REACTOME	HIV_INFECTION	0.0258691	-1
GO	SM_LIKE_PROTEIN_FAMILY_COMPLEX	0.0259378	-1
REACTOME	CELL_CYCLE_CHECKPOINTS	0.0263204	-1
REACTOME	CYTOSOLIC_IRON_SULFUR_CLUSTER_ASSEMBLY	0.0263204	-1
GO	ENDOSOMAL_PART	-0.0266911	-1
GO	ACTIVATION_OF_MAPKK_ACTIVITY	-0.0276976	-1
REACTOME	O_LINKED_GLYCOSYLATION_OF_MUCINS	-0.0284614	-1
GO	REGULATION_OF_RESPONSE_TO_EXTERNAL_STIMULUS	-0.028966	-1
GO	INTERFERON_RECEPTOR_ACTIVITY	-0.0298696	1
GO	SPLICEOSOMAL_TRI_SNRNP_COMPLEX_ASSEMBLY	0.0300761	-0.764246
REACTOME	HOST_INTERACTIONS_OF_HIV_FACTORS	0.0303646	0.260486
GO	TRANSLATIONAL_ELONGATION	0.0303646	-1
MSIGDB, HALLMARK	PROTEIN_SECRETION	-0.0317498	-0.969761
GO	CELLULAR_RESPONSE_TO_ENDOGENOUS_STIMULUS	-0.0317498	-1
GO	DNA_TEMPLATED_TRANSCRIPTION_ELONGATION	0.0317498	-1
GO	RETROGRADE_VESICLE_MEDIATED_TRANSPORT_GOLGI_TO_ENDOPLASMIC_RETICULUM	0.0317498	-1
GO	RIBOSOMAL_SMALL_SUBUNIT_BIOGENESIS	0.0325836	-0.21211
GO	UBIQUITIN_CONJUGATING_ENZYME_BINDING	-0.0325836	-0.34134
GO	TRANSFORMING_GROWTH_FACTOR_BETA2_PRODUCTION	-0.0325836	-0.726863
REACTOME	TRANSCRIPTION_COUPLED_NER_TC_NER	0.0325836	-1
GO	DNA_REPLICATION	0.0330548	-0.793178
REACTOME	TRANSCRIPTION_COUPLED_NUCLEOTIDE_EXCISION_REPAIR_TC_NER	0.0330548	-1
REACTOME	NONSENSE_MEDIATED_DECAY_NMD	0.0333367	0.154312
REACTOME	COPI_DEPENDENT_GOLGI_TO_ER_RETROGRADE_TRAFFIC	0.0333367	1
GO	BRAIN_MORPHOGENESIS	-0.0336548	-0.781709
GO	COGNITION	-0.0343077	-1
GO	NUCLEOTIDE_EXCISION_REPAIR	0.0345038	-1
GO	POSITIVE_REGULATION_OF_KINASE_ACTIVITY	-0.0345038	-1
GO	PROTEIN_DNA_COMPLEX_DISASSEMBLY	0.034838	-1
GO	SERTOLI_CELL_DEVELOPMENT	-0.035125	-0.855655
MSIGDB, HALLMARK	UV_RESPONSE_DN	-0.0352138	-0.0509133
REACTOME	RNA_POLYMERASE_I_TRANSCRIPTION_INITIATION	0.0356427	-0.592356
GO	OXIDOREDUCTASE_ACTIVITY_ACTING_ON_CH_OH_GROUP_OF_DONORS	0.0356843	-1
GO	CATALYTIC_STEP_2_SPLICEOSOME	0.0363415	-0.840558
REACTOME	NONSENSE_MEDIATED_DECAY_ENHANCED_BY_THE_EXON_JUNCTION_COMPLEX	0.0366237	0.319902
GO	MATURATION_OF_SSU_RRNA_FROM_TRICISTRONIC_RRNA_TRANSCRIPT_SSU_RRNA_5_8S_RRNA_LSU_RRNA_	0.0368719	-0.152238
GO	METAL_CLUSTER_BINDING	0.0368719	-1
REACTOME	ESR_MEDIATED_SIGNALING	-0.0368719	-1
REACTOME	SYNTHESIS_OF_GDP_MANNOSE	0.0368719	-1
REACTOME	TOLL_LIKE_RECEPTOR_CASCADES	-0.0380856	-1
GO	MITOCHONDRIAL_RESPIRATORY_CHAIN_COMPLEX_ASSEMBLY	0.0388714	0.0300583
GO	MYD88_DEPENDENT_TOLL_LIKE_RECEPTOR_SIGNALING_PATHWAY	-0.0388818	0.784489
REACTOME	RNA_POL_III_TRANSCRIPTION_INITIATION_FROM_TYPE_2_PROMOTER	0.0388818	-0.896457
GO	DNA_BIOSYNTHETIC_PROCESS	0.0388818	-0.999246
GO	CELL_CYCLE_PHASE_TRANSITION	0.0388818	-1
GO	NUCLEIC_ACID_PHOSPHODIESTER_BOND_HYDROLYSIS	0.0389093	-0.566881
GO	AMIDE_BIOSYNTHETIC_PROCESS	0.0396577	-1
GO	MACROAUTOPHAGY	-0.0396577	-1
GO	PROTEIN_LOCALIZATION_TO_MITOCHONDRION	0.0396577	-1
REACTOME	NEGATIVE_REGULATORS_OF_DDX58_IFIH1_SIGNALING	-0.0398464	-1
GO	MITOCHONDRION_ORGANIZATION	0.040362	-1
REACTOME	SELENOAMINO_ACID_METABOLISM	0.0408689	0.0542172
GO	TRANSCRIPTION_COUPLED_NUCLEOTIDE_EXCISION_REPAIR	0.0408689	-1
GO	REGULATION_OF_CELL_DIFFERENTIATION	-0.041112	-1
REACTOME	PRE_NOTCH_EXPRESSION_AND_PROCESSING	-0.041112	-1
GO	NEGATIVE_REGULATION_OF_BLOOD_VESSEL_DIAMETER	-0.0412702	-1
GO	SOMITE_DEVELOPMENT	-0.0414166	-0.300751
GO	INNER_MITOCHONDRIAL_MEMBRANE_ORGANIZATION	0.0417922	0.0304382
GO	REGULATION_OF_CELL_CYCLE_G2_M_PHASE_TRANSITION	0.0421391	-1
GO	OXIDOREDUCTASE_COMPLEX	0.0424043	2.49591e-06
GO	MONOSACCHARIDE_BIOSYNTHETIC_PROCESS	0.0424043	0.198513
REACTOME	MITOCHONDRIAL_TRNA_AMINOACYLATION	0.0424572	-0.735146
GO	POSITIVE_REGULATION_OF_MAPK_CASCADE	-0.0424572	-1
GO	PHOSPHOLIPID_EFFLUX	-0.042529	0.814047
KEGG	RIBOSOME	0.0432093	5.55143e-08
GO	INTRINSIC_COMPONENT_OF_ENDOPLASMIC_RETICULUM_MEMBRANE	0.0432333	-1
GO	ORGANIC_ACID_CATABOLIC_PROCESS	0.0432333	-1
GO	UBIQUITIN_LIKE_PROTEIN_SPECIFIC_PROTEASE_ACTIVITY	-0.0435547	-0.000392788
REACTOME	AUF1_HNRNP_D0_BINDS_AND_DESTABILIZES_MRNA	0.0435547	0.000921326
GO	RNA_3_END_PROCESSING	0.0435547	-0.0192997
REACTOME	APC_C:CDH1_MEDIATED_DEGRADATION_OF_CDC20_AND_OTHER_APC_C:CDH1_TARGETED_PROTEINS_IN_LATE_MITOSIS_EARLY_G1	0.0435547	0.0524837
REACTOME	TRANSCRIPTIONAL_REGULATION_OF_GRANULOPOIESIS	-0.0435547	0.425205
GO	SPLICEOSOMAL_COMPLEX	0.0435547	-0.456223
GO	REGULATION_OF_TRANSPORT	-0.0435547	-1
GO	NUCLEOSIDE_TRIPHOSPHATE_BIOSYNTHETIC_PROCESS	0.0439652	0.00410033
REACTOME	FORMATION_OF_THE_EARLY_ELONGATION_COMPLEX	0.0447736	-1
REACTOME	FORMATION_OF_THE_HIV1_EARLY_ELONGATION_COMPLEX	0.0447736	-1
GO	CHROMOSOME_ORGANIZATION	0.0448188	-3.67523e-06
REACTOME	FORMATION_OF_HIV_ELONGATION_COMPLEX_IN_THE_ABSENCE_OF_HIV_TAT	0.0452597	-1
GO	DICARBOXYLIC_ACID_METABOLIC_PROCESS	0.0453625	-1
GO	PEPTIDASE_COMPLEX	0.0454495	0.099514
REACTOME	ABORTIVE_ELONGATION_OF_HIV_1_TRANSCRIPT_IN_THE_ABSENCE_OF_TAT	0.0454495	-1
REACTOME	ABORTIVE_ELONGATION_OF_HIV1_TRANSCRIPT_IN_THE_ABSENCE_OF_TAT	0.0454495	-1
GO	POSITIVE_REGULATION_OF_INFLAMMATORY_RESPONSE	-0.0454874	0.0529659
GO	CHROMOSOMAL_REGION	0.0454874	-0.257917
GO	POSITIVE_REGULATION_OF_TRANSFERASE_ACTIVITY	-0.0454874	-1
GO	CELLULAR_RESPONSE_TO_PEPTIDE_HORMONE_STIMULUS	-0.0455463	-1
GO	SIGNAL_RELEASE	-0.0455463	-1
GO	NADH_DEHYDROGENASE_COMPLEX_ASSEMBLY	0.0462523	0.00527277
GO	DEFENSE_RESPONSE_TO_VIRUS	-0.0462523	-1
REACTOME	SRP_DEPENDENT_COTRANSLATIONAL_PROTEIN_TARGETING_TO_MEMBRANE	0.0465645	3.34609e-05
GO	SET1C_COMPASS_COMPLEX	0.046904	-1
GO	LOCOMOTION	-0.0469301	-1
REACTOME	CDK_MEDIATED_PHOSPHORYLATION_AND_REMOVAL_OF_CDC6	0.0480579	0.0507476
GO	REGULATION_OF_OSSIFICATION	-0.0494789	-1
REACTOME	LAGGING_STRAND_SYNTHESIS	0.0494789	-1
GO	PROTEIN_CONTAINING_COMPLEX_BINDING	0.0496008	-1
REACTOME	DISEASES_ASSOCIATED_WITH_N_GLYCOSYLATION_OF_PROTEINS	0.0496075	-0.824411
GO	FATTY_ACID_CATABOLIC_PROCESS	0.0496075	-0.942677
GO	PHOSPHATIDYLINOSITOL_3_PHOSPHATE_BIOSYNTHETIC_PROCESS	-0.0500229	-0.038284
GO	ENDOPEPTIDASE_COMPLEX	0.0542289	0.0111848
REACTOME	FOXO_MEDIATED_TRANSCRIPTION_OF_CELL_CYCLE_GENES	-0.0572058	-0.00323937
REACTOME	PCP_CE_PATHWAY	0.0614484	1.39428e-05
REACTOME	SCF_SKP2_MEDIATED_DEGRADATION_OF_P27_P21	0.0656235	0.00629439
REACTOME	DESTABILIZATION_OF_MRNA_BY_AUF1_HNRNP_D0	0.0710003	0.00280387
GO	PATTERN_SPECIFICATION_PROCESS	-0.0818187	-0.0339897
GO	CYTOSOLIC_RIBOSOME	0.0860734	0.0304382
GO	POLYNUCLEOTIDE_ADENYLYLTRANSFERASE_ACTIVITY	-0.0909449	-0.0162564
GO	MRNA_EXPORT_FROM_NUCLEUS	0.0913262	-0.0142002
REACTOME	CRISTAE_FORMATION	0.0947399	0.0326656
REACTOME	FBXL7_DOWN_REGULATES_AURKA_DURING_MITOTIC_ENTRY_AND_IN_EARLY_MITOSIS	0.0947463	0.000553865
GO	RIBONUCLEOPROTEIN_COMPLEX_SUBUNIT_ORGANIZATION	0.0947463	-0.0216477
GO	TRNA_MODIFICATION	0.0956838	-0.00889531
REACTOME	CDT1_ASSOCIATION_WITH_THE_CDC6_ORC_ORIGIN_COMPLEX	0.0956838	0.0120841
GO	CYTOSOLIC_LARGE_RIBOSOMAL_SUBUNIT	0.0959103	0.00835655
KEGG	PROTEASOME	0.0965266	1.649e-05
GO	AZUROPHIL_GRANULE_LUMEN	0.101819	5.55143e-08
REACTOME	DECTIN_1_MEDIATED_NONCANONICAL_NF_KB_SIGNALING	0.103105	0.00150465
GO	RNA_LOCALIZATION	0.106254	-0.00176368
GO	NUCLEAR_EXPORT	0.106254	-0.0101278
GO	MRNA_3_END_PROCESSING	0.106254	-0.0241592
GO	MITOCHONDRIAL_RESPIRATORY_CHAIN_COMPLEX_I	0.106472	7.46718e-07
GO	PROTEASOME_ACCESSORY_COMPLEX	0.108549	0.0204905
REACTOME	ER_PHAGOSOME_PATHWAY	0.112402	7.02766e-05
GO	HELICASE_ACTIVITY	0.113087	-4.69323e-07
REACTOME	SCFSKP2_MEDIATED_DEGRADATION_OF_P27_P21	0.120231	0.00700251
REACTOME	TRNA_PROCESSING	0.125794	-0.00984727
REACTOME	SCF_BETA_TRCP_MEDIATED_DEGRADATION_OF_EMI1	0.131947	0.00576382
REACTOME	INTERLEUKIN_10_SIGNALING	-0.131947	0.00899381
GO	PURINE_NTP_DEPENDENT_HELICASE_ACTIVITY	0.132988	-4.77012e-05
GO	TRANSFERASE_ACTIVITY_TRANSFERRING_ONE_CARBON_GROUPS	0.134969	-0.000527794
GO	CYTOCHROME_COMPLEX	0.136204	0.00319432
REACTOME	DEGRADATION_OF_DVL	0.139791	0.00477569
GO	DEFENSE_RESPONSE_TO_FUNGUS	0.139907	7.87624e-06
REACTOME	HEDGEHOG_LIGAND_BIOGENESIS	0.144227	0.00475679
REACTOME	REGULATION_OF_TLR_BY_ENDOGENOUS_LIGAND	-0.144227	0.0179611
REACTOME	COMPLEX_I_BIOGENESIS	0.145724	0.000553865
GO	PHAGOCYTIC_VESICLE	-0.145941	3.06841e-05
REACTOME	P53_INDEPENDENT_G1_S_DNA_DAMAGE_CHECKPOINT	0.146208	0.00166396
GO	ENERGY_COUPLED_PROTON_TRANSPORT_DOWN_ELECTROCHEMICAL_GRADIENT	0.147098	1.35556e-06
REACTOME	TRANSPORT_OF_MATURE_TRANSCRIPT_TO_CYTOPLASM	0.147714	-0.0273674
GO	INTERLEUKIN_6_PRODUCTION	-0.153348	0.034774
GO	ELECTRON_TRANSFER_ACTIVITY	0.155157	5.55143e-08
GO	NUCLEOBASE_CONTAINING_COMPOUND_TRANSPORT	0.156751	-0.000387421
GO	POSITIVE_REGULATION_OF_INTERLEUKIN_8_PRODUCTION	-0.156781	0.000944894
REACTOME	AUTODEGRADATION_OF_CDH1_BY_CDH1_APC_C	0.164603	0.0290064
REACTOME	NEGATIVE_REGULATION_OF_NOTCH4_SIGNALING	0.170475	0.000596659
REACTOME	AMYLOID_FIBER_FORMATION	-0.175891	0.0192948
GO	SPECIFIC_GRANULE_MEMBRANE	-0.176784	7.02766e-05
REACTOME	DEFECTIVE_CFTR_CAUSES_CYSTIC_FIBROSIS	0.178756	0.0024198
GO	RNA_EXPORT_FROM_NUCLEUS	0.180588	-0.000271844
GO	S_ADENOSYLMETHIONINE_DEPENDENT_METHYLTRANSFERASE_ACTIVITY	0.181203	-0.00489995
REACTOME	CROSS_PRESENTATION_OF_SOLUBLE_EXOGENOUS_ANTIGENS_ENDOSOMES	0.182787	0.000293484
GO	MITOCHONDRIAL_ELECTRON_TRANSPORT_NADH_TO_UBIQUINONE	0.184534	9.23197e-07
REACTOME	ASYMMETRIC_LOCALIZATION_OF_PCP_PROTEINS	0.189626	0.00176705
GO	REGIONALIZATION	-0.193178	-0.039445
GO	INTERLEUKIN_8_PRODUCTION	-0.193373	0.0227074
GO	ATP_BIOSYNTHETIC_PROCESS	0.194162	0.000131038
GO	PROTON_TRANSPORTING_ATP_SYNTHASE_COMPLEX_CATALYTIC_CORE_F_1_	0.195862	0.0168934
GO	PROTON_TRANSPORTING_ATP_SYNTHASE_ACTIVITY_ROTATIONAL_MECHANISM	0.196524	0.000271844
KEGG	PENTOSE_PHOSPHATE_PATHWAY	0.197044	0.0154152
REACTOME	UCH_PROTEINASES	0.200363	0.0472368
GO	INTERLEUKIN_8_SECRETION	-0.201281	0.0210485
REACTOME	G1_S_DNA_DAMAGE_CHECKPOINTS	0.209273	0.00105613
REACTOME	VIF_MEDIATED_DEGRADATION_OF_APOBEC3G	0.210693	7.42269e-05
GO	DNA_DEPENDENT_ATPASE_ACTIVITY	0.214112	-0.0120494
GO	CYSTEINE_TYPE_PEPTIDASE_ACTIVITY	-0.214281	-0.0151867
REACTOME	REGULATION_OF_APOPTOSIS	0.215747	0.000412309
REACTOME	GAP_JUNCTION_TRAFFICKING_AND_REGULATION	0.216994	0.00129963
GO	REGULATION_OF_CHROMOSOME_ORGANIZATION	0.216994	-0.0155114
KEGG	CARDIAC_MUSCLE_CONTRACTION	0.223292	0.00176493
GO	REGULATION_OF_ESTABLISHMENT_OF_PLANAR_POLARITY	0.226473	0.0227074
REACTOME	MHC_CLASS_II_ANTIGEN_PRESENTATION	0.228461	0.0199004
REACTOME	RHO_GTPASES_ACTIVATE_PKNS	-0.228651	0.0018904
GO	OXIDOREDUCTASE_ACTIVITY_ACTING_ON_NAD_P_H_QUINONE_OR_SIMILAR_COMPOUND_AS_ACCEPTOR	0.234218	2.26522e-06
KEGG	LYSOSOME	0.23501	0.00383872
GO	BLOOD_MICROPARTICLE	0.243284	0.0366027
GO	MRNA_TRANSPORT	0.251528	-0.0146238
GO	COTRANSLATIONAL_PROTEIN_TARGETING_TO_MEMBRANE	0.254228	0.0262462
REACTOME	GAP_JUNCTION_DEGRADATION	0.273173	0.0271036
GO	SNRNP_BINDING	0.275423	0.0365437
GO	ATP_DEPENDENT_DNA_HELICASE_ACTIVITY	0.275623	-0.0477738
GO	CHROMATIN_BINDING	0.280826	-0.00166396
REACTOME	RECYCLING_PATHWAY_OF_L1	0.283688	0.0155114
REACTOME	DEGRADATION_OF_GLI1_BY_THE_PROTEASOME	0.289781	0.00273131
REACTOME	AUTODEGRADATION_OF_THE_E3_UBIQUITIN_LIGASE_COP1	0.29554	0.00176758
GO	METHYLATION	0.296491	-0.000258151
GO	REGULATION_OF_CELLULAR_AMINE_METABOLIC_PROCESS	0.30177	3.99081e-05
GO	PATTERN_RECOGNITION_RECEPTOR_ACTIVITY	-0.302114	0.00381424
REACTOME	REGULATION_OF_MRNA_STABILITY_BY_PROTEINS_THAT_BIND_AU_RICH_ELEMENTS	0.310577	0.00636621
GO	POSITIVE_REGULATION_OF_TRANSCRIPTION_BY_RNA_POLYMERASE_I	0.31269	-0.0344952
GO	MONONUCLEAR_CELL_MIGRATION	-0.318646	0.0044981
GO	MHC_CLASS_I_PROTEIN_BINDING	0.323616	0.0450397
REACTOME	ABC_TRANSPORTER_DISORDERS	0.32572	0.0194021
REACTOME	REGULATION_OF_ORNITHINE_DECARBOXYLASE_ODC	0.327792	0.000109676
REACTOME	REGULATION_OF_RUNX3_EXPRESSION_AND_ACTIVITY	0.328174	0.00023913
GO	NADH_DEHYDROGENASE_ACTIVITY	0.329627	1.39323e-05
REACTOME	CHROMATIN_ORGANIZATION	0.331442	-0.0229917
GO	OXIDOREDUCTASE_ACTIVITY_ACTING_ON_DIPHENOLS_AND_RELATED_SUBSTANCES_AS_DONORS	0.331699	0.0249333
GO	REGULATION_OF_NUCLEOBASE_CONTAINING_COMPOUND_METABOLIC_PROCESS	0.338551	-0.0191379
REACTOME	FORMATION_OF_ATP_BY_CHEMIOSMOTIC_COUPLING	0.345807	0.000998797
GO	ARACHIDONIC_ACID_BINDING	-0.348821	0.000553865
GO	LATE_ENDOSOME_MEMBRANE	-0.353007	0.0298748
GO	ESTABLISHMENT_OF_PROTEIN_LOCALIZATION_TO_ENDOPLASMIC_RETICULUM	0.357259	0.0291266
GO	POSITIVE_REGULATION_OF_INTERLEUKIN_8_SECRETION	-0.364902	0.000598767
GO	MACROMOLECULE_METHYLATION	0.372226	-0.000232396
REACTOME	THROMBIN_SIGNALLING_THROUGH_PROTEINASE_ACTIVATED_RECEPTORS_PARS	-0.37243	0.0219233
GO	GLUTATHIONE_DERIVATIVE_BIOSYNTHETIC_PROCESS	0.37924	0.00969673
GO	NUCLEOPLASM_PART	0.381162	-5.55143e-08
GO	RNA_METHYLATION	0.381162	-0.00199313
GO	ORGAN_OR_TISSUE_SPECIFIC_IMMUNE_RESPONSE	-0.381162	0.010442
GO	ESTABLISHMENT_OF_RNA_LOCALIZATION	0.385395	-0.000760708
GO	REGULATION_OF_MONONUCLEAR_CELL_MIGRATION	-0.389413	0.0401661
KEGG	SYSTEMIC_LUPUS_ERYTHEMATOSUS	-0.394787	0.000434936
REACTOME	DEGRADATION_OF_AXIN	0.398385	0.0120841
GO	NEUTROPHIL_MIGRATION	-0.401765	9.23197e-07
REACTOME	STABILIZATION_OF_P53	0.404086	0.00150305
GO	REGULATION_OF_ACTIN_CYTOSKELETON_REORGANIZATION	0.404086	0.00629439
GO	ICOSANOID_BINDING	-0.405221	0.0212829
REACTOME	P53_DEPENDENT_G1_DNA_DAMAGE_RESPONSE	0.40882	0.00731217
GO	REGULATION_OF_CELLULAR_AMINO_ACID_METABOLIC_PROCESS	0.412189	0.000258151
GO	RNA_HELICASE_ACTIVITY	0.412457	-0.000553865
GO	PROTON_TRANSPORTING_ATP_SYNTHASE_COMPLEX	0.415571	3.52141e-05
GO	NEGATIVE_REGULATION_OF_BIOSYNTHETIC_PROCESS	-0.417706	-0.0124179
GO	MITOCHONDRIAL_PROTON_TRANSPORTING_ATP_SYNTHASE_COMPLEX_COUPLING_FACTOR_F_O_	0.42221	0.00629439
GO	REGULATORY_REGION_NUCLEIC_ACID_BINDING	-0.422596	-0.0300334
GO	NUCLEAR_TRANSPORT	0.430747	-0.00431982
REACTOME	REGULATION_OF_RAS_BY_GAPS	0.433807	0.0111532
GO	N_METHYLTRANSFERASE_ACTIVITY	0.437356	-0.0323875
GO	ALTERNATIVE_MRNA_SPLICING_VIA_SPLICEOSOME	-0.438935	-0.000887581
GO	GRANULOCYTE_MIGRATION	-0.442892	5.55143e-08
GO	PROTON_TRANSMEMBRANE_TRANSPORT	0.442892	4.61848e-06
GO	AZUROPHIL_GRANULE_MEMBRANE	-0.452473	0.000114962
GO	RNA_METHYLTRANSFERASE_ACTIVITY	0.455042	-0.00889531
REACTOME	TNFR2_NON_CANONICAL_NF_KB_PATHWAY	0.491505	0.00830185
GO	MHC_PROTEIN_BINDING	0.492571	0.0420338
GO	FICOLIN_1_RICH_GRANULE	0.49468	5.55143e-08
GO	ANTIGEN_PROCESSING_AND_PRESENTATION_OF_PEPTIDE_ANTIGEN_VIA_MHC_CLASS_I	0.500116	6.82858e-05
GO	PROTEIN_CONTAINING_COMPLEX_LOCALIZATION	0.506793	-0.0124179
REACTOME	METABOLISM_OF_POLYAMINES	0.510264	0.000229129
GO	PEPTIDYL_LYSINE_METHYLATION	-0.519733	-0.0475659
GO	ANTIMICROBIAL_HUMORAL_IMMUNE_RESPONSE_MEDIATED_BY_ANTIMICROBIAL_PEPTIDE	-0.519886	1.08304e-07
GO	DEFENSE_RESPONSE_TO_GRAM_NEGATIVE_BACTERIUM	0.519886	0.00197554
GO	PEPTIDYL_LYSINE_MODIFICATION	0.523665	-0.000258151
GO	NUCLEAR_BODY	-0.528492	-3.70486e-07
GO	COVALENT_CHROMATIN_MODIFICATION	-0.538672	-0.000131407
GO	POSITIVE_REGULATION_OF_TUMOR_NECROSIS_FACTOR_SUPERFAMILY_CYTOKINE_PRODUCTION	-0.542888	0.000258151
GO	KILLING_OF_CELLS_OF_OTHER_ORGANISM	0.547095	5.65237e-06
KEGG	GLUTATHIONE_METABOLISM	0.547802	0.00629439
GO	REGULATION_OF_PHAGOCYTOSIS	-0.548861	0.0114642
GO	RESPONSE_TO_FUNGUS	0.554247	0.00032535
REACTOME	HEDGEHOG_ON_STATE	0.556375	0.0272206
GO	NEGATIVE_REGULATION_OF_RNA_BIOSYNTHETIC_PROCESS	-0.558258	-0.00707798
GO	RESPIRATORY_CHAIN_COMPLEX_IV	0.563013	0.00629439
GO	TERTIARY_GRANULE_MEMBRANE	-0.578091	0.013684
REACTOME	GENERIC_TRANSCRIPTION_PATHWAY	-0.578765	-0.000392788
GO	HISTONE_METHYLTRANSFERASE_COMPLEX	0.584785	-0.0102139
GO	REGULATION_OF_GENE_EXPRESSION_EPIGENETIC	-0.587182	-0.0169902
GO	METHYLTRANSFERASE_COMPLEX	0.590885	-0.00224461
GO	PROTEASOME_CORE_COMPLEX_BETA_SUBUNIT_COMPLEX	0.592645	0.00347929
REACTOME	BETA_CATENIN_INDEPENDENT_WNT_SIGNALING	0.601705	0.00294087
GO	CULLIN_RING_UBIQUITIN_LIGASE_COMPLEX	0.605324	-0.0466808
GO	POSITIVE_REGULATION_OF_TUMOR_NECROSIS_FACTOR_BIOSYNTHETIC_PROCESS	-0.60714	0.0256761
GO	ATP_HYDROLYSIS_COUPLED_CATION_TRANSMEMBRANE_TRANSPORT	0.608398	0.0049263
GO	DNA_BINDING_TRANSCRIPTION_REPRESSOR_ACTIVITY_RNA_POLYMERASE_II_SPECIFIC	-0.610161	-0.0337025
GO	PROTEIN_METHYLATION	-0.617403	-0.012328
GO	ANTIGEN_PROCESSING_AND_PRESENTATION_OF_EXOGENOUS_PEPTIDE_ANTIGEN_VIA_MHC_CLASS_I	0.617725	1.12346e-06
GO	REGULATION_OF_RNA_SPLICING	-0.619796	-0.0021116
GO	POSITIVE_REGULATION_OF_LEUKOCYTE_MIGRATION	-0.622753	0.0284524
GO	CALCIUM_POTASSIUM_SODIUM_ANTIPORTER_ACTIVITY	-0.627092	-0.0405161
GO	ENERGY_COUPLED_PROTON_TRANSMEMBRANE_TRANSPORT_AGAINST_ELECTROCHEMICAL_GRADIENT	0.63076	0.00567139
GO	REGULATION_OF_MRNA_SPLICING_VIA_SPLICEOSOME	-0.631622	-0.00159411
REACTOME	BUDDING_AND_MATURATION_OF_HIV_VIRION	-0.635314	0.0280568
GO	DISRUPTION_OF_CELLS_OF_OTHER_ORGANISM_INVOLVED_IN_SYMBIOTIC_INTERACTION	0.647008	0.00538771
REACTOME	SULFIDE_OXIDATION_TO_SULFATE	0.649872	0.0300583
GO	POST_EMBRYONIC_EYE_MORPHOGENESIS	0.650655	0.02185
GO	REGULATION_OF_MRNA_PROCESSING	0.655745	-0.00123083
GO	ACTIVE_ION_TRANSMEMBRANE_TRANSPORTER_ACTIVITY	0.65643	0.0142718
REACTOME	G_PROTEIN_ACTIVATION	-0.659541	0.0485021
GO	NUCLEAR_SPECK	0.660843	-0.000661682
GO	REACTIVE_OXYGEN_SPECIES_METABOLIC_PROCESS	-0.663776	0.000386471
GO	METHYLATED_HISTONE_BINDING	-0.666684	-0.0122565
GO	SECONDARY_LYSOSOME	-0.667122	0.00396223
GO	REGULATION_OF_RNA_METABOLIC_PROCESS	0.66875	-0.000361576
GO	SPECIFIC_GRANULE_LUMEN	0.668765	6.48443e-08
GO	ZYMOGEN_ACTIVATION	0.671352	0.018162
GO	TRANSFERASE_COMPLEX	-0.675389	-2.79261e-05
GO	POSITIVE_REGULATION_OF_NEURON_APOPTOTIC_PROCESS	-0.677546	0.0250809
REACTOME	CILIUM_ASSEMBLY	0.686095	-0.0309712
GO	CYTOLYSIS	0.68664	0.00695127
REACTOME	RHO_GTPASES_ACTIVATE_PAKS	-0.689308	0.0249333
GO	HISTONE_METHYLATION	0.689631	-0.0133607
GO	ANTIBACTERIAL_HUMORAL_RESPONSE	0.690641	0.00406296
GO	PROTON_TRANSPORTING_TWO_SECTOR_ATPASE_COMPLEX_CATALYTIC_DOMAIN	0.691625	0.00293363
GO	RESPIRATORY_BURST	0.694833	1.97367e-06
GO	RESPIRATORY_BURST_INVOLVED_IN_DEFENSE_RESPONSE	0.699594	0.039445
GO	MRNA_SPLICE_SITE_SELECTION	-0.701642	-0.0245716
GO	ATPASE_ACTIVITY_COUPLED_TO_TRANSMEMBRANE_MOVEMENT_OF_IONS_ROTATIONAL_MECHANISM	0.705315	1.56535e-05
GO	PROTEASOME_CORE_COMPLEX	0.712559	0.0443424
GO	REGULATION_OF_NEUTROPHIL_DEGRANULATION	0.715425	0.0194021
GO	RAGE_RECEPTOR_BINDING	-0.719608	0.00294965
KEGG	VIBRIO_CHOLERAE_INFECTION	0.721393	0.018162
GO	OXIDOREDUCTASE_ACTIVITY_ACTING_ON_NAD_P_H	0.725131	5.55143e-08
GO	HISTONE_BINDING	-0.72959	-0.00107976
GO	ENDOPEPTIDASE_ACTIVATOR_ACTIVITY	0.733013	0.0217648
GO	OXIDOREDUCTASE_ACTIVITY_ACTING_ON_A_HEME_GROUP_OF_DONORS	0.736706	0.0401882
GO	CILIUM	-0.737833	-0.0152594
GO	CHROMATIN_ORGANIZATION	0.738689	-7.02766e-05
GO	PROTON_TRANSPORTING_TWO_SECTOR_ATPASE_COMPLEX_PROTON_TRANSPORTING_DOMAIN	0.738689	0.00983637
GO	ZINC_ION_BINDING	-0.739683	-0.0250809
GO	ENDONUCLEOLYTIC_CLEAVAGE_INVOLVED_IN_RRNA_PROCESSING	0.741395	-0.0458827
GO	TUMOR_NECROSIS_FACTOR_SUPERFAMILY_CYTOKINE_PRODUCTION	-0.747011	0.000109228
GO	OXIDOREDUCTASE_ACTIVITY_ACTING_ON_A_SULFUR_GROUP_OF_DONORS	0.747622	0.0124393
GO	AMINE_METABOLIC_PROCESS	0.754241	0.0323875
GO	MICROTUBULE_ORGANIZING_CENTER	0.754309	-0.0054476
GO	DISRUPTION_BY_HOST_OF_SYMBIONT_CELLS	0.754384	0.00337243
KEGG	PATHOGENIC_ESCHERICHIA_COLI_INFECTION	0.755208	0.00399204
MSIGDB, HALLMARK	REACTIVE_OXYGEN_SPECIES_PATHWAY	0.756067	2.95465e-05
GO	CILIUM_ORGANIZATION	0.764939	-0.00794922
GO	CELL_TRAILING_EDGE	0.767131	0.0155114
GO	POSITIVE_REGULATION_OF_INTERLEUKIN_10_SECRETION	-0.767722	0.0338217
GO	ATP_HYDROLYSIS_COUPLED_TRANSMEMBRANE_TRANSPORT	0.768064	0.00671321
REACTOME	L1CAM_INTERACTIONS	0.774141	0.034774
REACTOME	INTERLEUKIN_1_SIGNALING	0.776308	0.0415081
REACTOME	ANTIMICROBIAL_PEPTIDES	0.777866	0.000123663
GO	REGULATION_OF_TRANSCRIPTION_FROM_RNA_POLYMERASE_II_PROMOTER_IN_RESPONSE_TO_HYPOXIA	0.779935	0.00717238
GO	CENTROSOME	0.779935	-0.0120986
MSIGDB, HALLMARK	COAGULATION	0.782965	1.57883e-06
GO	INTERLEUKIN_1_MEDIATED_SIGNALING_PATHWAY	0.783126	0.0314987
GO	NEGATIVE_REGULATION_OF_EXTRACELLULAR_MATRIX_DISASSEMBLY	0.783855	0.048505
GO	PROTON_TRANSPORTING_TWO_SECTOR_ATPASE_COMPLEX	0.784192	5.8824e-06
GO	HEMOGLOBIN_COMPLEX	0.784329	0.047238
REACTOME	ANTIGEN_PROCESSING_CROSS_PRESENTATION	0.787438	5.55143e-08
GO	MICROTUBULE_ORGANIZING_CENTER_PART	0.788836	-0.0120268
GO	PENTOSE_PHOSPHATE_SHUNT	0.789105	0.0182661
GO	POSITIVE_REGULATION_OF_RNA_BIOSYNTHETIC_PROCESS	-0.790655	-0.0199004
GO	ADENOSINE_TO_INOSINE_EDITING	-0.795395	-0.013877
GO	SUPEROXIDE_METABOLIC_PROCESS	-0.801799	8.85547e-05
REACTOME	REGULATION_OF_ACTIN_DYNAMICS_FOR_PHAGOCYTIC_CUP_FORMATION	-0.801799	0.0286162
REACTOME	SMAD2_SMAD3_SMAD4_HETEROTRIMER_REGULATES_TRANSCRIPTION	0.8047	-0.0273674
GO	VIRAL_BUDDING_VIA_HOST_ESCRT_COMPLEX	-0.807613	0.0485832
REACTOME	HEME_DEGRADATION	0.812931	0.0458827
GO	PEPTIDE_N_ACETYLTRANSFERASE_ACTIVITY	-0.815351	-0.00367416
GO	PROTEIN_ACETYLATION	-0.818744	-0.0124393
GO	DENDRITIC_CELL_DIFFERENTIATION	-0.827883	0.0396846
REACTOME	GENE_EXPRESSION_TRANSCRIPTION	0.831212	-1.48042e-07
REACTOME	RUNX1_REGULATES_TRANSCRIPTION_OF_GENES_INVOLVED_IN_DIFFERENTIATION_OF_HSCS	0.841853	0.00032535
REACTOME	CELLULAR_RESPONSE_TO_HYPOXIA	0.84481	0.0249333
GO	CENTRIOLE	0.847766	-0.00641667
REACTOME	DETOXIFICATION_OF_REACTIVE_OXYGEN_SPECIES	0.852529	9.19846e-05
GO	REGULATION_OF_NEUTROPHIL_ACTIVATION	0.852541	0.00502919
GO	ANTIMICROBIAL_HUMORAL_RESPONSE	-0.853701	5.55143e-08
GO	PROTEIN_ACETYLTRANSFERASE_COMPLEX	-0.854568	-0.00502919
GO	PROTON_TRANSMEMBRANE_TRANSPORTER_ACTIVITY	0.855275	0.00040402
GO	N_ACETYLTRANSFERASE_ACTIVITY	-0.856088	-0.00695127
GO	PROTEIN_ACYLATION	0.856582	-0.01924
GO	NEGATIVE_REGULATION_OF_KERATINOCYTE_DIFFERENTIATION	-0.859034	-0.0195519
GO	TERTIARY_GRANULE_LUMEN	-0.860106	5.55143e-08
GO	REGULATION_OF_VIRAL_ENTRY_INTO_HOST_CELL	0.860485	0.00160857
GO	REGULATION_OF_SUPEROXIDE_METABOLIC_PROCESS	-0.861104	0.00026628
GO	INNATE_IMMUNE_RESPONSE_IN_MUCOSA	-0.861648	0.027223
GO	TUMOR_NECROSIS_FACTOR_BIOSYNTHETIC_PROCESS	-0.864759	0.00671321
GO	TRANSFERRIN_TRANSPORT	0.865872	0.0234449
REACTOME	C_TYPE_LECTIN_RECEPTORS_CLRS	-0.867604	0.0132393
GO	FICOLIN_1_RICH_GRANULE_MEMBRANE	0.86823	3.01279e-06
GO	GROWTH_FACTOR_ACTIVITY	-0.884359	0.038426
GO	PEPTIDYL_LYSINE_ACETYLATION	0.88721	-0.016051
REACTOME	PROTEIN_REPAIR	-0.887237	0.000258151
GO	DOUBLE_STRANDED_DNA_BINDING	-0.893192	-0.0117371
GO	INNATE_IMMUNE_RESPONSE_ACTIVATING_CELL_SURFACE_RECEPTOR_SIGNALING_PATHWAY	0.893975	0.00804363
GO	PCG_PROTEIN_COMPLEX	-0.894279	-0.0151888
GO	ORGANELLE_ASSEMBLY	0.898894	-0.0396846
REACTOME	DEADENYLATION_OF_MRNA	0.898901	-0.0376811
GO	SYNAPTIC_TRANSMISSION_DOPAMINERGIC	-0.90614	0.0102139
REACTOME	RHO_GTPASES_ACTIVATE_NADPH_OXIDASES	-0.907574	0.00138296
GO	ACETYLTRANSFERASE_ACTIVITY	0.911556	-0.0271346
GO	GLUTATHIONE_PEROXIDASE_ACTIVITY	0.912441	0.0124179
GO	GLUTATHIONE_TRANSFERASE_ACTIVITY	0.915731	0.0444116
GO	SEQUENCE_SPECIFIC_DNA_BINDING	0.91804	-0.00381424
GO	REGULATION_OF_REACTIVE_OXYGEN_SPECIES_METABOLIC_PROCESS	0.920346	0.00113453
GO	MRNA_BINDING	-0.929243	-0.0459188
REACTOME	EPH_EPHRIN_SIGNALING	0.930281	0.00279366
GO	DETOXIFICATION	-0.936512	0.00480179
GO	N_ACYLTRANSFERASE_ACTIVITY	-0.939442	-0.00928688
REACTOME	LATENT_INFECTION_OF_HOMO_SAPIENS_WITH_MYCOBACTERIUM_TUBERCULOSIS	-0.943145	0.000882575
REACTOME	MAPK6_MAPK4_SIGNALING	0.947024	0.0154152
GO	POSITIVE_REGULATION_OF_SUPEROXIDE_ANION_GENERATION	-0.949234	0.00166396
GO	REGULATION_OF_RIBOSOME_BIOGENESIS	-0.949573	-0.0387388
GO	INFLAMMATORY_RESPONSE_TO_WOUNDING	-0.949573	0.0471585
REACTOME	IRON_UPTAKE_AND_TRANSPORT	-0.951284	0.0112976
REACTOME	ROS_AND_RNS_PRODUCTION_IN_PHAGOCYTES	-0.9528	0.000954931
GO	CELL_KILLING	0.954272	9.23197e-07
GO	CELLULAR_DETOXIFICATION	-0.954272	0.00703892
GO	KERATINIZATION	0.954292	0.0298647
GO	ANTIOXIDANT_ACTIVITY	-0.956346	0.000797727
GO	REGULATION_OF_LEUKOCYTE_DEGRANULATION	0.956625	0.0185329
GO	DEFENSE_RESPONSE_TO_BACTERIUM	-0.959531	7.46718e-07
REACTOME	SMOOTH_MUSCLE_CONTRACTION	-0.959646	0.00197554
GO	REGULATION_OF_INTEGRIN_MEDIATED_SIGNALING_PATHWAY	0.962421	0.0150067
GO	NEGATIVE_REGULATION_OF_VIRAL_ENTRY_INTO_HOST_CELL	-0.963179	0.0223636
GO	REGULATION_OF_SUPEROXIDE_ANION_GENERATION	-0.963439	0.000498131
GO	PEPTIDE_CROSS_LINKING	0.966422	0.0472368
REACTOME	SUMOYLATION	0.968379	-0.00315212
GO	TRNA_METHYLTRANSFERASE_ACTIVITY	0.968379	-0.0296425
GO	LEUKOCYTE_MEDIATED_CYTOTOXICITY	-0.968521	0.0134658
REACTOME	SUMOYLATION_OF_DNA_DAMAGE_RESPONSE_AND_REPAIR_PROTEINS	-0.970241	-0.0108206
GO	POSITIVE_REGULATION_OF_REACTIVE_OXYGEN_SPECIES_METABOLIC_PROCESS	-0.972528	0.000238749
GO	CILIARY_PART	-0.974152	-0.00713556
GO	RELEASE_OF_CYTOCHROME_C_FROM_MITOCHONDRIA	-0.97491	0.0447743
GO	PHAGOSOME_ACIDIFICATION	-0.975408	0.038284
GO	SKELETAL_MUSCLE_ACETYLCHOLINE_GATED_CHANNEL_CLUSTERING	0.976211	-0.0325899
GO	INTEGRIN_MEDIATED_SIGNALING_PATHWAY	0.977215	0.0119452
REACTOME	RESPONSE_TO_ELEVATED_PLATELET_CYTOSOLIC_CA2PLUS	0.978132	0.000271844
GO	PROTON_TRANSPORTING_ATPASE_ACTIVITY_ROTATIONAL_MECHANISM	0.978466	0.0120986
GO	OXIDOREDUCTASE_ACTIVITY_ACTING_ON_PEROXIDE_AS_ACCEPTOR	-0.979487	0.00197554
GO	PHAGOLYSOSOME	0.981354	0.0485832
GO	PLATELET_DEGRANULATION	-0.986957	3.53403e-05
GO	SUPEROXIDE_ANION_GENERATION	-0.989893	0.00215145
GO	PEPTIDASE_REGULATOR_ACTIVITY	-0.990542	0.00518662
GO	ENDOPEPTIDASE_REGULATOR_ACTIVITY	0.992907	0.00144941
REACTOME	IMMUNOREGULATORY_INTERACTIONS_BETWEEN_A_LYMPHOID_AND_A_NON_LYMPHOID_CELL	0.993125	0.000398697
GO	MEIOTIC_CELL_CYCLE_CHECKPOINT	-0.993125	-0.0495146
REACTOME	INSULIN_RECEPTOR_RECYCLING	-0.993471	0.0216477
GO	ANCHORED_COMPONENT_OF_MEMBRANE	-0.993593	0.000998797
GO	PROTEIN_REPAIR	-0.993593	0.00294087
GO	REGULATION_OF_RELEASE_OF_CYTOCHROME_C_FROM_MITOCHONDRIA	0.99564	0.0250809
GO	LEUKOTRIENE_BIOSYNTHETIC_PROCESS	-1	0.00785186
GO	FIBRINOLYSIS	1	0.00845509
REACTOME	TRANSFERRIN_ENDOCYTOSIS_AND_RECYCLING	1	0.0177831

## Sheet: SuppTable 2E
Supplementary Table 2E
	The parameter map		The compared healthy and disease groups
Name of comparison	Cohort for the construction of the parameter map	Parameters included in the parameter map	The healthy group	Characteristic of the healthy group	The disease group	Characteristic of the disease group	Types of parameters in the healthy and disease groups
Atherosclerosis in obese older-adults males	72 healthy obese male individuals from the 300-OB cohort (Figure 1D)	physiological and clinical parameters (Supp Tables 3,4)	72 individuals (300-OB cohort)	Older adults, overweight and obese, males, no atherosclerosis	95 individuals (300-OB cohort)	Older adults, overweight and obese, males, with atherosclerosis	Physiological and clinical parameters (Supp Tables 3,4)
Atherosclerosis in obese older-adults females	68 healthy obese female individuals from the 300-OB cohort	physiological and clinical parameters (Supp Tables 3,4)	68 individuals (300-OB cohort)	Older adults, overweight and obese, females, no atherosclerosis	67 individuals (300-OB cohort)	Older adults, overweight and obese, females, with atherosclerosis	Physiological and clinical parameters (Supp Tables 3,4)
SLE in female children	68 healthy normal BMI individuals from the 500FG cohort (Figure 2D-I)	Transcriptome only	26 individuals (Banchereau et al. 2016)	Children, females, no SLE	719 individuals (Banchereau et al. 2016)	Children, females, with SLE	Transcriptome only
SLE in male children	68 healthy normal BMI individuals from the 500FG cohort (Figure 2D-I)	Transcriptome only	6 individuals (Banchereau et al. 2016)	Children, males, no SLE	87 individuals (Banchereau et al. 2016)	Children, males, with SLE	Transcriptome only
SLE in female adults	68 healthy normal BMI individuals from the 500FG cohort (Figure 2D-I)	Transcriptome only	17 individuals (Chiche et al. 2014)	Adults, females, no SLE	131 individuals (Chiche et al. 2014)	Adults, females, with SLE	Transcriptome only
Diabetes, in obese older-adults with carotid atherosclerosis	126 healthy obese individuals from the 300-OB cohort (no diabetes, no atherosclerosis), Figure 1A	physiological and clinical parameters (Supp Tables 3,4)	139 individuals (300-OB cohort)	Older adults, overweight and obese, males and females, with atherosclerosis, no diabetes	23 individuals (300-OB cohort)	Older adults, overweight and obese, males and females, with atherosclerosis, with diabetes	Physiological and clinical parameters (Supp Tables 3,4)
Diabetes, in obese older-adults	126 healthy obese individuals from the 300-OB cohort (no diabetes, no atherosclerosis), Figure 1A	physiological and clinical parameters (Supp Tables 3,4)	126 individuals (OB cohort)	Older adults, overweight and obese, males and females, no atherosclerosis, no diabetes	14 individuals (OB cohort)	Older adults, overweight and obese, males and females, no atherosclerosis, with diabetes	Physiological and clinical parameters (Supp Tables 3,4)
Diabetes, in obese older-adults with coronary atherosclerosis (Coronary-atherosclerosis cohort)	126 healthy obese individuals from the 300-OB cohort (no diabetes, no atherosclerosis), Figure 1A	physiological and clinical parameters (Supp Tables 3,4)	146 individuals (Coronary-atherosclerosis cohort)	Older adults, overweight and obese, males and females, with atherosclerosis, no diabetes	81 individuals (Coronary-atherosclerosis cohort cohort)	Older adults, overweight and obese, males and females, with atherosclerosis, with diabetes	Physiological and clinical parameters

## Sheet: SuppTable2F
Supplementary Table 2F
Parameter name	Conventional association with atherosclerosis	State-independent association with atherosclerosis	Documented positive/negative associations with atherosclerosis and/or cardiovascular disease	Reference
%Basophils	0.332256	9.25081e-05
%Eosinophils	9.34877e-05	-9.47255e-05
%Lymphocytes	0.829632	0.932506
%Monocytes	-8.76701e-05	-9.26705e-05
%Neutrophils	-0.678784	-0.697335
3-hydroxybutyrate	9.34212e-05	9.39425e-05	Documented negatively associated with atherosclerosis and/or CVD	PMC 5313038, PMID 23396451
Acetate	8.76042e-05	9.42376e-05
Acetoacetate	0.000115712	9.05388e-05	Documented negatively associated with atherosclerosis and/or CVD	PMC 5313038, PMID 23396451
Adiponectin	-9.43937e-05	9.33823e-05	Documented negatively associated with atherosclerosis and/or CVD	PMID 21252989
Alanine	9.28678e-05	-0.374647
Albumin	0.00373142	-9.34477e-05	Documented positively associated with atherosclerosis and/or CVD	PMC 5681838
Amount and abdominal adipose tissue (AAT)	0.369074	0.100741
Ankle brachial index (ABI)	-0.0147435	-0.000101206	Documented positively associated with atherosclerosis and/or CVD	atherosclerosis-related test
ApoA1	0.348295	9.32245e-05	Documented negatively associated with atherosclerosis and/or CVD	PMID 18333887
ApoB	2.58779	6.60779e-05	Documented positively associated with atherosclerosis and/or CVD	PMID: 18277343
ApoB/ApoA1 ratio	2.0805	9.27475e-05	Documented positively associated with atherosclerosis and/or CVD	PMID: 18277343
Basophils	-9.2794e-05	-9.32455e-05
Cholesterol	1.46148	-9.28745e-05	Documented positively associated with atherosclerosis and/or CVD	PMC 3541631
Citrate	0.038466	0.0408372
Deep SAT	-0.306986	-9.96561e-05	Documented negatively associated with atherosclerosis and/or CVD	PMID 18220642
DHA/FA ratio	-9.35084e-05	-0.000114476
Docosahexaenoic acid (DHA)	0.0981466	-9.60266e-05
Eosinophils	9.31472e-05	-9.36205e-05
Erythrocytes	-9.28041e-05	-0.0219852
Esterized cholesterol	1.61232	-6.63011e-05	Documented positively associated with atherosclerosis and/or CVD	PMID 23430610
Estimated degree of unsaturation	-0.347944	-0.145913
FAw3/FA ratio	-0.544423	-0.453096
FAw6/FA ratio	-0.0194794	9.28776e-05
Free cholesterol	2.51585	0.128752
Glucose	0.400135	0.000105408	Documented positively associated with atherosclerosis and/or CVD	PMID: 27390330
Glycoprotein acetyls (Gp)	0.766723	9.28957e-05	Documented positively associated with atherosclerosis and/or CVD	PMID 30571186
HbA1c	-9.17215e-05	-0.0614149	Documented positively associated with atherosclerosis and/or CVD	PMID: 28178313
HDL cholesterol	-9.46818e-05	-9.3508e-05	Documented negatively associated with atherosclerosis and/or CVD	PMID: 15198960
HDL diameter	-9.7719e-05	9.83025e-05
HDL triglycerids	2.47634	0.375481	Documented positively associated with atherosclerosis and/or CVD	PMID: 31252694
HDL2 cholesterol	-0.000111068	9.3713e-05	Documented negatively associated with atherosclerosis and/or CVD	PMID: 15198960
HDL3 cholesterol	9.24227e-05	-9.26926e-05	Documented negatively associated with atherosclerosis and/or CVD	PMID: 15198960
Heart rate	-0.945952	-0.815173	Documented positively associated with atherosclerosis and/or CVD	PMC3082732
Hematocriet	9.31528e-05	-9.36938e-05
Hemoglobin	9.36154e-05	-9.36778e-05
high sensitivity C-reactive proteins (hsCRP)	9.39048e-05	-9.35026e-05	Documented positively associated with atherosclerosis and/or CVD	PMID 16624260
Hip circumference	-0.221973	-0.109316	Documented negatively associated with atherosclerosis and/or CVD	PMC2727216
Histidine	-9.37267e-05	9.38071e-05
HOME-IR	-9.32157e-05	-9.28349e-05
Hypertension	2.03547	0.609811	Documented positively associated with atherosclerosis and/or CVD	PMID: 6987872, 136891
IL18	0.0661023	9.31415e-05
IL18pba	0.400513	9.38706e-05
IL1B	-0.000104982	-0.313759
IL-1B response to C. Albicans	0.312318	0.000119361	Documented negatively associated with atherosclerosis and/or CVD	PMID 27746093
IL-1B response to LPS	9.40223e-05	9.36856e-05	Documented negatively associated with atherosclerosis and/or CVD	PMID 27746093
IL-1B response to P. Gingivalis	-0.227343	-0.048642	Documented negatively associated with atherosclerosis and/or CVD	PMID 27746093
IL-1B response to PHA	-0.000103014	9.37852e-05	Documented negatively associated with atherosclerosis and/or CVD	PMID 27746093
IL-1B response to S. Aureus	0.000100355	0.0483527	Documented negatively associated with atherosclerosis and/or CVD	PMID 27746093
IL-1RA response to C. Albicans	-0.196701	-0.27902	Documented negatively associated with atherosclerosis and/or CVD	PMID 27746093
IL-1RA response to LPS	-9.29013e-05	-9.81962e-05	Documented negatively associated with atherosclerosis and/or CVD	PMID 27746093
IL-1RA response to P. Gingivalis	-0.276511	-0.270844	Documented negatively associated with atherosclerosis and/or CVD	PMID 27746093
IL-1RA response to PHA	-9.62272e-05	-0.000116261	Documented negatively associated with atherosclerosis and/or CVD	PMID 27746093
IL-1RA response to S. Aureus	-0.457574	-0.337007	Documented negatively associated with atherosclerosis and/or CVD	PMID 27746093
Blood IL-6	0.000101609	-9.32748e-05
IL-6 response to P. Gingivalis	-0.7619	-0.939986	Documented negatively associated with atherosclerosis and/or CVD	PMID 27746093
IL-6 response to S. Aureus	-1.47329	-1.15304	Documented negatively associated with atherosclerosis and/or CVD	PMID 27746093
IL-6 response to C. Albicans	0.663232	0.132217	Documented negatively associated with atherosclerosis and/or CVD	PMID 27746093
IL-6 response to LPS	-0.0578326	-0.0478517	Documented negatively associated with atherosclerosis and/or CVD	PMID 27746093
IL-6 response to PHA	-1.52261	-0.982231	Documented negatively associated with atherosclerosis and/or CVD	PMID 27746093
Isoleucine	1.24179	0.000108123
Kreatinine	9.34259e-05	9.39967e-05	Documented positively associated with atherosclerosis and/or CVD	PMID 9056611
LA/FA ratio	-9.33834e-05	9.26802e-05
Lactose	-0.0789682	-0.737442
LDL cholesterol	1.60772	-6.57198e-05	Documented positively associated with atherosclerosis and/or CVD	PMC 5217612,PMID: 28444290
LDL diameter	-0.000115445	9.07927e-05
Leptin	-9.29676e-05	-9.76483e-05	Documented positively associated with atherosclerosis and/or CVD	PMID: 16580676
Leucine	0.957638	0.199743
Leukocytes	9.4067e-05	-9.36601e-05
Linoleic acid (LA)	2.66714	0.0426506
Liver fat	-0.124242	-0.376023	Documented positively associated with atherosclerosis and/or CVD	PMID 23073871
Lymphocytes	0.702061	0.391112
mean cell volume (MCV), is a measure of the average volume of a red blood corpuscle	0.367796	0.233567
Mean corpuscular Hb concentration	-9.39502e-05	9.34547e-05
Monocytes	-9.3602e-05	-0.000100299
Monounsaturated fatty acids (MUFA)	2.22014	6.85001e-05
MUFA/FA ratio	0.414287	-9.2885e-05
Nascent HDL cholesterol	1.9383	9.28025e-05	Documented positively associated with atherosclerosis and/or CVD	PMC 5217612
Neutrophils	-0.000111133	-0.192526
Omega-3 fatty acids (FAw3)	0.000102846	-0.188942	Documented positively associated with atherosclerosis and/or CVD	PMID: 29134121
Omega-6 fatty acids (FAw6)	2.59502	9.70489e-05
Peripheral augmentation index	1.03734	0.401288	Documented positively associated with atherosclerosis and/or CVD	PMC 3138105
Phenylalanine	0.403459	9.28428e-05
Phosphatidylcholine (and other cholines)	2.19858	7.88544e-05
Polyunsaturated fatty acids (PUFA)	2.21373	9.26518e-05
PUFA/FA ratio	-0.213162	-9.45058e-05
Pulse wave velocity (PWV), direct	0.431682	0.176838
Pulse wave velocity (PWV), indirect	0.5787	0.281572
red cell distribution width (RDW)	-9.27929e-05	-9.28742e-05	Documented positively associated with atherosclerosis and/or CVD	PMC4634828, PMID 29359154,PMID 29038615
Remnant cholesterol	2.61023	7.00873e-05	Documented positively associated with atherosclerosis and/or CVD	PMC 5217612
Resistin	0.1403	9.33354e-05	Documented positively associated with atherosclerosis and/or CVD	PMC5041127
Saturated fatty acids (SFA)	2.87132	0.0781559	Documented positively associated with atherosclerosis and/or CVD	PMID: 20711693
Serum cholesterol	1.96143	6.62071e-05	Documented positively associated with atherosclerosis and/or CVD	PMC 5217612
Serum Triglycerides	1.75809	0.034413	Documented positively associated with atherosclerosis and/or CVD	PMC3234107
SFA/FA ratio	-9.28135e-05	9.30543e-05	Documented positively associated with atherosclerosis and/or CVD	PMID: 20711693
Sphingomyelins	1.77494	7.58742e-05
STDEV of PWV, direct	0.0172781	9.33125e-05
STDEV of PWV, indirect	0.0797998	9.5977e-05
Subcutaneous adipose tissue (SAT)	-0.303211	-0.000102359	Documented negatively associated with atherosclerosis and/or CVD	PMC3751977
superficial SAT	-9.38123e-05	9.28515e-05	Documented negatively associated with atherosclerosis and/or CVD	PMC3751977
Thrombocytes	9.34526e-05	9.33941e-05
TNF-a response to S. Aureus	-9.36365e-05	9.39285e-05	Documented negatively associated with atherosclerosis and/or CVD	PMID 27746093
TNF-a response to C. Albicans	-9.40242e-05	-9.32675e-05	Documented negatively associated with atherosclerosis and/or CVD	PMID 27746093
TNF-a response to LPS	-0.374645	-0.198653	Documented negatively associated with atherosclerosis and/or CVD	PMID 27746093
TNF-a response to P. Gingivalis	9.3024e-05	9.39506e-05	Documented negatively associated with atherosclerosis and/or CVD	PMID 27746093
TNF-a response to PHA	-0.482335	-0.142643	Documented negatively associated with atherosclerosis and/or CVD	PMID 27746093
Total cholesterol	2.10975	8.71915e-05	Documented positively associated with atherosclerosis and/or CVD	PMC 5217612
Total fatty acids (FA)	2.71683	8.48071e-05
Total phosphoglycerides	1.2003	9.28044e-05
Triglycerides	1.31645	0.0864754	Documented positively associated with atherosclerosis and/or CVD	PMC3234107
Triglycerides to phosphoglycerides ratio	0.949488	9.25013e-05
Tyrosine	0.238302	9.3989e-05
Valine	0.0570845	9.43443e-05
VAT/SAT ratio	1.10399	0.400585	Documented positively associated with atherosclerosis and/or CVD	PMC3751977
VEGF	-9.86038e-05	-0.000105437	Documented positively associated with atherosclerosis and/or CVD	PMC 5586422
visceral adipose tissue (VAT)	0.95144	0.467958	Documented positively associated with atherosclerosis and/or CVD	PMC3751977
VLDL cholesterol	2.60296	9.22315e-05	Documented positively associated with atherosclerosis and/or CVD	PMC 5217612
VLDL diameter	0.411433	0.000383644	Documented positively associated with atherosclerosis and/or CVD	PMC 5811927
VLDL Triglycerides	1.31907	6.73396e-05	Documented positively associated with atherosclerosis and/or CVD	PMC 5811927
Waist Circumference	9.21252e-05	8.42488e-05	Documented positively associated with atherosclerosis and/or CVD	PMID: 23505191
IDL-P	1.90073	6.55263e-05
IDL-L	-9.74584e-05	-8.05718e-05
IDL-PL	-0.823705	-9.8747e-05
IDL-C	-9.30714e-05	9.29893e-05
IDL-CE	9.76945e-05	0.000106418
IDL-FC	-9.47615e-05	-0.0021943
IDL-TG	9.34388e-05	9.28855e-05	Documented positively associated with atherosclerosis and/or CVD	PMID: 26892957
IDL-PL_%	-0.91333	-0.0314372
IDL-C_%	9.40305e-05	9.26224e-05
IDL-CE_%	0.0508791	0.0703968
IDL-FC_%	-0.134459	-0.229108
IDL-TG_%	0.000118188	9.28868e-05	Documented positively associated with atherosclerosis and/or CVD	PMID: 26892957
XXL-VLDL-P	1.04632	0.289952
XXL-VLDL-L	0.000103328	-7.94279e-05
XXL-VLDL-PL	0.658929	0.180975
XXL-VLDL-C	9.31126e-05	-0.000108138
XXL-VLDL-CE	-9.37877e-05	-0.0853127
XXL-VLDL-FC	0.170367	9.28604e-05
XXL-VLDL-TG	-9.6936e-05	9.76192e-05
XL-VLDL-P	0.559776	0.0027656
XL-VLDL-L	0.137126	0.0870809
XL-VLDL-PL	2.73443	1.07857
XL-VLDL-C	9.33431e-05	9.27448e-05
XL-VLDL-CE	-9.31866e-05	-9.24755e-05
XL-VLDL-FC	0.339707	0.296215
XL-VLDL-TG	-0.514749	-0.279664
L-VLDL-P	0.930978	8.85571e-05
L-VLDL-L	1.21584	0.0218845
L-VLDL-PL	2.20292	0.14409
L-VLDL-C	0.285928	8.27321e-05
L-VLDL-CE	9.30397e-05	9.27424e-05
L-VLDL-FC	2.5041	0.483265
L-VLDL-TG	-0.622172	-7.91703e-05
M-VLDL-P	1.4815	7.29693e-05
M-VLDL-L	0.775771	7.92075e-05
M-VLDL-PL	0.0946118	-9.3841e-05
M-VLDL-C	0.300602	9.59396e-05
M-VLDL-CE	0.00010731	9.21786e-05
M-VLDL-FC	2.25475	9.4186e-05
M-VLDL-TG	-0.15089	-9.21698e-05
S-VLDL-P	2.12991	6.54721e-05
S-VLDL-L	-9.33063e-05	7.8223e-05
S-VLDL-PL	-0.551304	-9.33897e-05
S-VLDL-C	9.32867e-05	9.21437e-05
S-VLDL-CE	9.38455e-05	9.22006e-05
S-VLDL-FC	-9.30026e-05	-9.37863e-05
S-VLDL-TG	9.2685e-05	-9.25722e-05
XS-VLDL-P	2.47583	6.56483e-05
XS-VLDL-L	-0.131246	6.63806e-05
XS-VLDL-PL	0.0634706	-9.37596e-05
XS-VLDL-C	-0.284112	9.27536e-05
XS-VLDL-CE	-0.107486	9.28221e-05
XS-VLDL-FC	-0.620575	-0.110032
XS-VLDL-TG	0.000100704	-9.25393e-05
L-LDL-P	1.90399	6.6658e-05
L-LDL-L	-0.114494	-0.000100282
L-LDL-PL	-1.86737	9.28609e-05
L-LDL-C	9.68042e-05	-0.000100243
L-LDL-CE	0.615158	-9.35503e-05
L-LDL-FC	-1.36523	-7.63654e-05
L-LDL-TG	9.69302e-05	9.21705e-05
M-LDL-P	1.85752	-6.65694e-05
M-LDL-L	-1.04814	9.31059e-05
M-LDL-PL	-0.827087	9.25628e-05
M-LDL-C	9.25253e-05	-0.0521522
M-LDL-CE	0.561554	-7.18034e-05
M-LDL-FC	-2.20249	-6.59803e-05
M-LDL-TG	8.81092e-05	9.25657e-05
S-LDL-P	1.84785	-6.65122e-05
S-LDL-L	-1.25991	-9.74414e-05
S-LDL-PL	-1.05197	9.2513e-05
S-LDL-C	9.28012e-05	-7.80641e-05
S-LDL-CE	0.439929	-9.30753e-05
S-LDL-FC	-2.27265	-9.27348e-05
S-LDL-TG	0.466287	0.0178216
XL-HDL-P	9.2735e-05	0.000103186
XL-HDL-L	-0.371628	-0.000115276
XL-HDL-PL	9.37247e-05	0.251009
XL-HDL-C	-0.290622	-0.176916
XL-HDL-CE	-0.552	-0.298558
XL-HDL-FC	0.325945	9.39944e-05
XL-HDL-TG	0.528567	-9.26167e-05
L-HDL-P	-9.28338e-05	9.28329e-05
L-HDL-L	-0.553295	-9.26061e-05
L-HDL-PL	0.535758	-9.34845e-05
L-HDL-C	-0.77362	-9.27869e-05
L-HDL-CE	-1.0094	-9.27587e-05
L-HDL-FC	-0.234414	-9.26181e-05
L-HDL-TG	0.719907	9.21553e-05
M-HDL-P	9.39682e-05	9.45756e-05
M-HDL-L	-1.20603	-9.2981e-05
M-HDL-PL	0.000103719	-9.32012e-05
M-HDL-C	-1.69131	-9.29002e-05
M-HDL-CE	-1.94047	-9.25553e-05
M-HDL-FC	-0.000115865	-9.24822e-05
M-HDL-TG	2.36151	0.195004
S-HDL-P	9.00963e-05	-9.32377e-05
S-HDL-L	-9.46712e-05	-9.22753e-05
S-HDL-PL	-0.840497	0.0401937
S-HDL-C	0.135296	-0.316313
S-HDL-CE	0.286542	-0.195811
S-HDL-FC	-1.32139	-9.40257e-05
S-HDL-TG	1.04699	9.45496e-05
XXL-VLDL-PL_%	0.630697	0.287808
XXL-VLDL-C_%	9.30632e-05	-8.57069e-05
XXL-VLDL-CE_%	-9.30762e-05	-0.0914807
XXL-VLDL-FC_%	0.173371	9.27984e-05
XXL-VLDL-TG_%	-0.000110908	9.75566e-05
XL-VLDL-PL_%	2.85459	1.10016
XL-VLDL-C_%	9.30511e-05	9.28169e-05
XL-VLDL-CE_%	-9.31845e-05	-9.25804e-05
XL-VLDL-FC_%	0.372232	0.332021
XL-VLDL-TG_%	-0.427412	-0.251377
L-VLDL-PL_%	0.547335	-9.32566e-05
L-VLDL-C_%	0.208708	8.17872e-05
L-VLDL-CE_%	-9.29217e-05	9.27763e-05
L-VLDL-FC_%	2.32758	0.414853
L-VLDL-TG_%	-0.735882	-7.52194e-05
M-VLDL-PL_%	9.23529e-05	-9.31887e-05
M-VLDL-C_%	0.266525	9.71251e-05
M-VLDL-CE_%	0.000113019	9.23598e-05
M-VLDL-FC_%	1.96944	9.23102e-05
M-VLDL-TG_%	-0.146559	-9.28739e-05
S-VLDL-PL_%	-0.755077	-9.34327e-05
S-VLDL-C_%	9.41192e-05	9.24425e-05
S-VLDL-CE_%	9.3757e-05	9.22341e-05
S-VLDL-FC_%	-9.51401e-05	-9.25571e-05
S-VLDL-TG_%	9.39298e-05	-9.25768e-05
XS-VLDL-PL_%	0.250547	-9.36156e-05
XS-VLDL-C_%	-0.163403	9.3925e-05
XS-VLDL-CE_%	-0.0767872	9.68761e-05
XS-VLDL-FC_%	-0.74009	-0.253912
XS-VLDL-TG_%	0.000105932	-9.25281e-05
L-LDL-PL_%	-0.999774	9.2722e-05
L-LDL-C_%	0.0619197	-7.80844e-05
L-LDL-CE_%	0.929812	-9.2996e-05
L-LDL-FC_%	-0.286794	9.32619e-05
L-LDL-TG_%	9.71308e-05	9.22204e-05
M-LDL-PL_%	-0.136479	9.31741e-05
M-LDL-C_%	0.068641	-7.60507e-05
M-LDL-CE_%	0.358691	-9.23786e-05
M-LDL-FC_%	-1.49662	9.2227e-05
M-LDL-TG_%	0.00604132	9.32241e-05
S-LDL-PL_%	-0.797425	9.22031e-05
S-LDL-C_%	0.000104488	-0.0318984
S-LDL-CE_%	0.623797	-9.22197e-05
S-LDL-FC_%	-1.64861	9.28035e-05
S-LDL-TG_%	0.492635	0.000623127
XL-HDL-PL_%	9.85667e-05	0.252951
XL-HDL-C_%	-0.303284	-0.2309
XL-HDL-CE_%	-0.536985	-0.330307
XL-HDL-FC_%	0.53497	0.000106097
XL-HDL-TG_%	0.538093	-9.26309e-05
L-HDL-PL_%	0.60204	9.28914e-05
L-HDL-C_%	-0.837103	-9.27285e-05
L-HDL-CE_%	-1.04538	-9.27611e-05
L-HDL-FC_%	-0.200867	-9.2638e-05
L-HDL-TG_%	0.723058	9.21451e-05
M-HDL-PL_%	0.492056	9.35459e-05
M-HDL-C_%	-1.68617	-9.2397e-05
M-HDL-CE_%	-1.90382	-9.27346e-05
M-HDL-FC_%	-9.33785e-05	-9.22661e-05
M-HDL-TG_%	2.33837	0.187637
S-HDL-PL_%	-0.750072	0.0639901
S-HDL-C_%	0.206807	-0.277082
S-HDL-CE_%	0.340439	-0.16769
S-HDL-FC_%	-1.21469	9.31985e-05
S-HDL-TG_%	1.01579	9.48638e-05

## Sheet: SuppTable 2G
Supplementary Table 2G
SLE in female children (Banchereau et al. 2016)		SLE in male children (Banchereau et al. 2016)		SLE in female adults (Chiche et al. 2014)
Gene name	State-independent association score	Gene name	State-independent association score*	Gene name	State-independent association score
IFI44L	22.6984	IFI44L	3.27382	IFIH1	7.82782
IFI27	21.2588	RSAD2	3.1092	RSAD2	7.82782
RSAD2	21.2588	HERC5	3.03815	IFI44	7.82782
IFI44	21.1345	IFIT1	2.97462	IFI27	7.73841
IFIT1	18.815	POU2F1	2.94565	LAP3	7.59161
HERC5	17.4246	IFIT2	2.84569	DDX60	7.51096
MX1	17.1771	POLR3C	2.8436	TDRD7	7.51096
IFIT2	16.5616	DHX58	2.7509	IFI44L	7.48794
OASL	16.0433	OAS3	2.67286	TNFSF10	7.24833
IFI6	15.2592	IFI44	2.53409	IFI6	7.24833
OAS3	14.6747	IFI27	2.50744	OAS3	7.23005
IFIT3	14.5445	HERC6	2.4959	ISG15	7.10764
TRIM22	13.3709	OASL	2.48614	LAMP3	7.10764
ISG15	12.9859	COMMD4	2.45489	OASL	6.66131
EIF2AK2	11.3703	MX1	2.40414	HERC5	6.39986
ZBP1	11.1918	TNFAIP6	2.30078	EIF2AK2	6.39986
OAS2	11.1759	MX2	2.23152	FCGR1A	6.1916
IFITM3	10.7821	EIF2AK2	2.19822	IFIT3	6.06528
DDX60	10.5574	IFIT3	2.18648	GBP1	5.97432
DHX58	9.43514	IFI6	2.18395	OAS2	5.89187
LY6E	9.28029	AGBL2	-2.01159	IFIT1	5.7616
STAT1	9.04602	CLIC2	-2.0765	SNTB1	5.66205
HERC6	8.95692	DNAJC16	-2.0908	IFITM1	5.66205
CXCL10	8.57271	EFNA1	-2.10023	IFIT5	5.59113
PLSCR1	8.40572	MOCS3	-2.1708	IFI35	5.31357
IFIT5	8.37435	SOAT2	-2.17428	RTP4	5.28228
RTP4	8.36653	ZHX3	-2.17825	LY6E	5.12831
SERPING1	8.01828	HSPA13	-2.20527	IFIT2	5.07983
IFI35	7.9021	LIF	-2.23614	TRIM22	5.05218
IRF7	7.76668	TPBG	-2.243	CISH	5.00061
REC8	7.70165	CLPB	-2.3762	MX1	4.95297
DDX58	7.54956	MAPK1IP1L	-2.38074	IFI16	4.85419
SPATS2L	7.49262	CACNB3	-2.39207	BNIP2	4.85061
MX2	7.48489	PANK3	-2.40859	MYD88	4.80093
OTOF	7.415	FBXL8	-2.47764	XAF1	4.75793
PARP12	7.40318	SNRPE	-2.50319	DDX58	4.71853
LAMP3	7.21	NPEPPS	-2.52413	JAK2	4.6346
TNFAIP6	7.13836	CREB3	-2.57159	RNASE2	4.53415
IFIH1	7.09886	C4BPB	-2.60753	USP18	4.49874
TRIM5	6.80106	SLC22A1	-2.74054	HERC6	4.49874
LGALS3BP	6.66964	ZNF440	-2.93436	TOR1B	4.45995
TDRD7	6.62401	ARHGAP22	-3.02222	TRAFD1	4.42376
GBP1	6.60223	C4BPA	-3.07258	SPATS2L	4.334
TOR1B	6.44632	LIN7C	-3.28051	MT2A	4.31511
USP18	6.30406	ELK4	-3.6465	DRAP1	4.19868
STAT2	6.06717	RABEP2	-3.71664	BLVRA	4.14537
SAT1	5.99976	GPR153	-4.09308	DHX58	4.10356
IL1RN	5.6345	MTFR1	-4.14098	SERPING1	4.05161
IFI16	5.52988	SLC16A10	-4.96284	CXCL10	4.00104
SP100	5.28969	LPL	-5.1504	LGALS3BP	3.96753
TYMP	5.24469			IL1RN	3.96482
TNK2	5.20714			IFITM3	3.96482
IFITM1	5.07741			TRIM5	3.88739
XAF1	4.97506			ACOT9	3.84935
TARBP1	4.91113			PARP11	3.84599
TAP1	4.78034			SRBD1	3.80782
CHMP5	4.42617			UBE2L6	3.78092
HIST1H2AC	4.15136			TNFAIP6	3.73991
PML	4.14546			IRF7	3.69964
MRPS18C	4.05923			CHMP5	3.64727
PDE9A	4.03699			PARP12	3.64194
MT1X	4.01049			GRN	3.59699
LAP3	3.97997			DAPP1	3.52591
CEACAM1	3.93464			SIGLEC1	3.49746
TNFSF10	3.92227			ZBP1	3.49746
MT2A	3.90554			STAT1	3.48577
ADAR	3.81532			TAP1	3.39581
PFKP	3.80985			UNC93B1	3.35127
CYSLTR1	3.69044			DLST	3.32007
TMEM123	3.64236			ENY2	3.27059
HIST1H4H	3.62817			OTOF	3.22213
ABCA1	3.57249			DYNLT1	3.17915
ACSL3	3.45987			TRIM21	3.1216
RHBDF2	3.32393			TLR2	3.11244
TMEM140	3.25955			GLRX	3.10832
ISG20	3.25449			PPP1R15A	-3.11695
RAB11FIP5	-3.289			PTGDS	-3.13052
KCNG1	-3.3623			CNTNAP1	-3.14175
HNRNPF	-3.43272			PPP1R13B	-3.15508
CCT4	-3.61363			CLDN15	-3.35127
CD244	-3.66148			DHPS	-3.49746
EIF3L	-3.93464			SRRM2	-3.51727
DSC1	-4.38494			LRCH4	-3.69547
TSHZ2	-5.60475			KLRB1	-3.8044
CRIP2	-5.69083			THOC5	-3.9124
KLRB1	-6.54546			MEF2D	-4.60083
ABCB1	-7.02848			PTOV1	-5.07328
FEZ1	-18.7192			KLF13	-5.20591
				KLHL22	-5.63054
				STIP1	-5.64476
				RUSC1	-5.64476
				KIAA0355	-6.09656
				CDC37	-7.82782
