# Supplementary figures and images for: An integrative model of cardiometabolic traits identifies two types of metabolic syndrome
Source: eLife journal article supplement (doi:10.7554/elife.61710), 2021-01-28

Figure 1 - Supplement 1

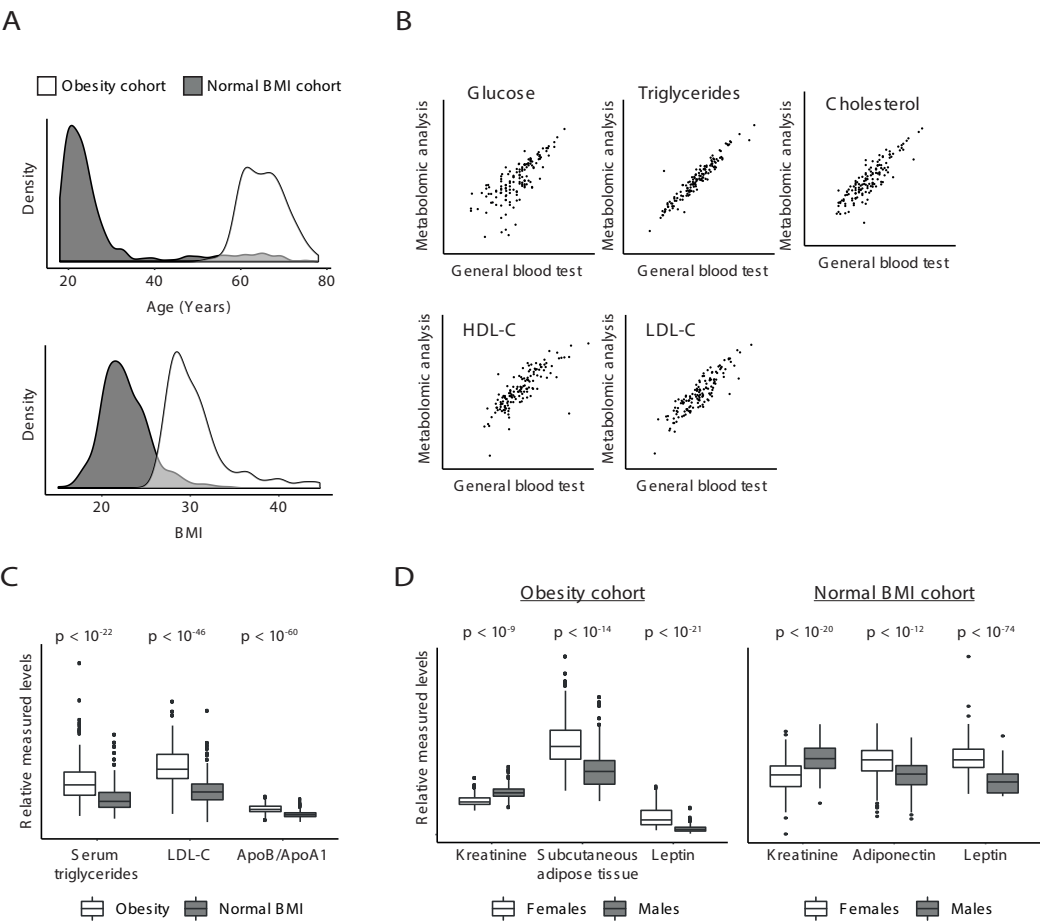

Supplement: supp [file elife-61710-supp-v1.zip › elife_poa_e61710_Figure_1_figure_supplement_1.pdf]

Figure 1 - Supplement 2

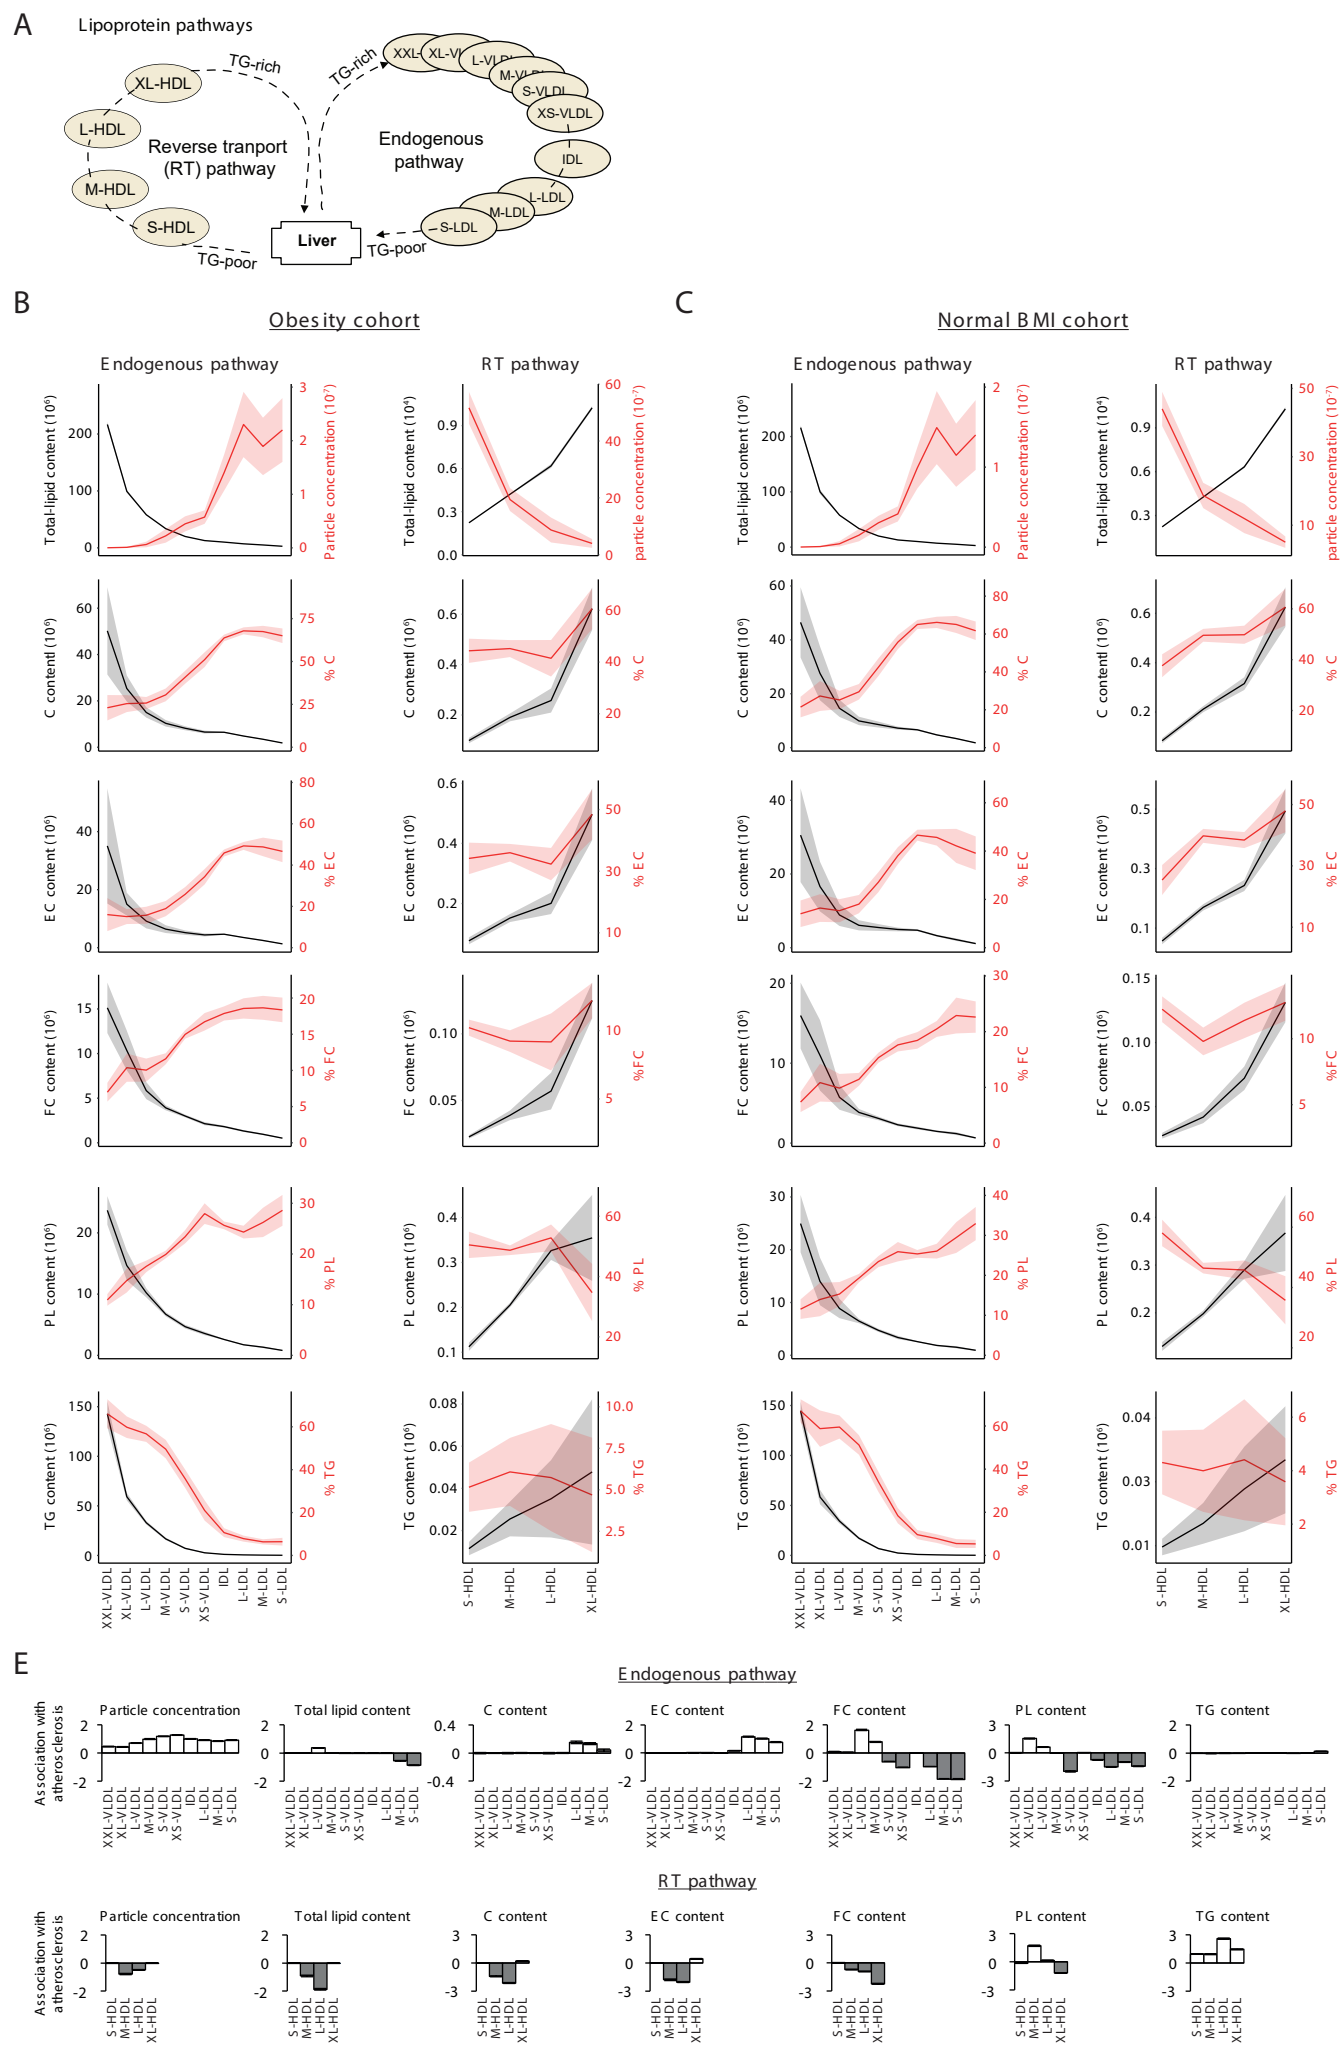

Supplement: supp [file elife-61710-supp-v1.zip › elife_poa_e61710_Figure_1_figure_supplement_2.pdf]

Figure 1 - Supplement 3

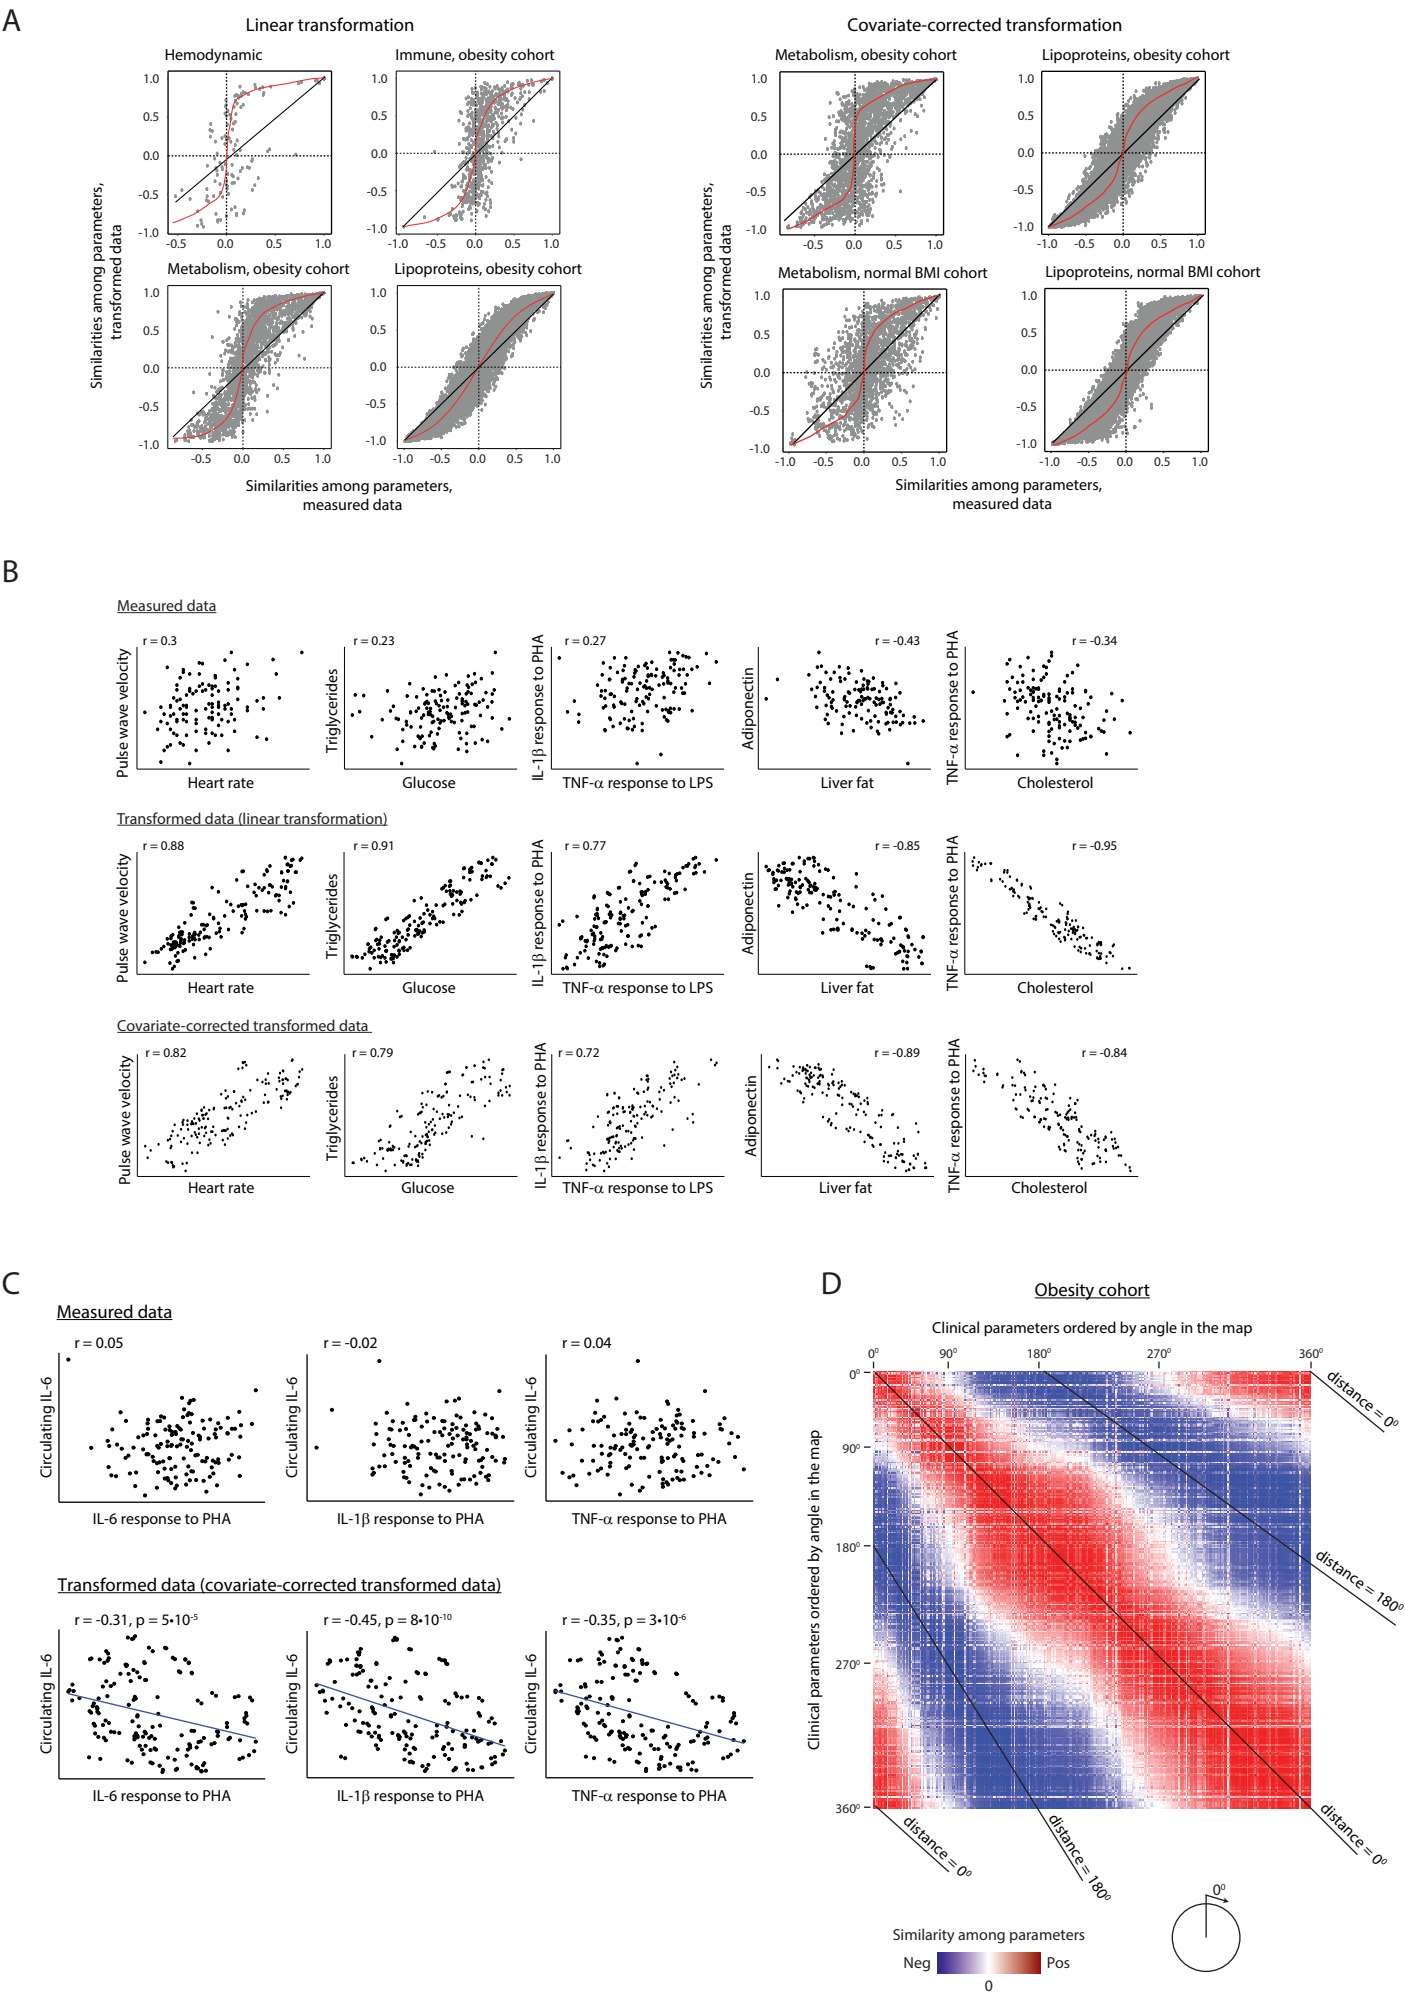

Supplement: supp [file elife-61710-supp-v1.zip › elife_poa_e61710_Figure_1_figure_supplement_3.pdf]

Figure 1 - Supplement 4

A

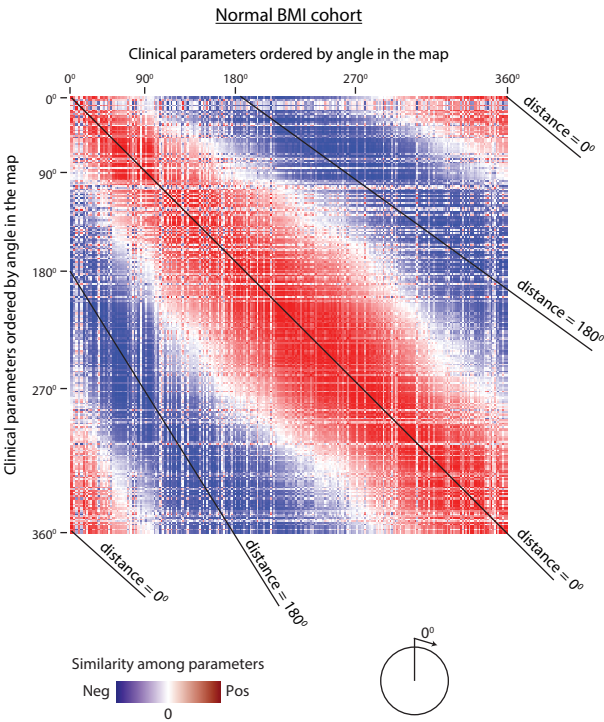

B

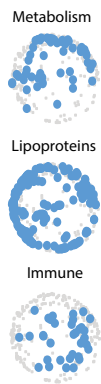

C

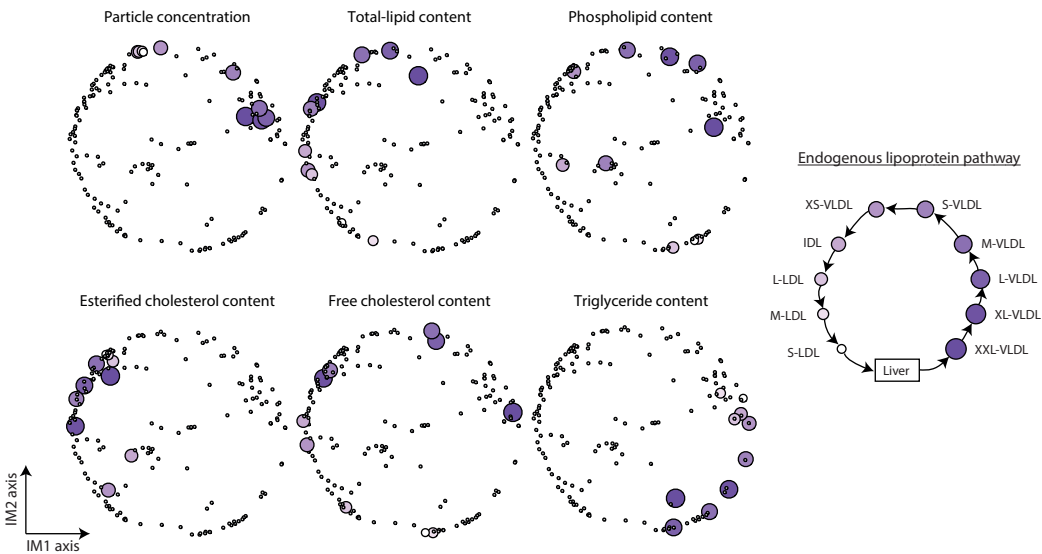

Supplement: supp [file elife-61710-supp-v1.zip › elife_poa_e61710_Figure_1_figure_supplement_4.pdf]

Figure 1 - Supplement 5

A

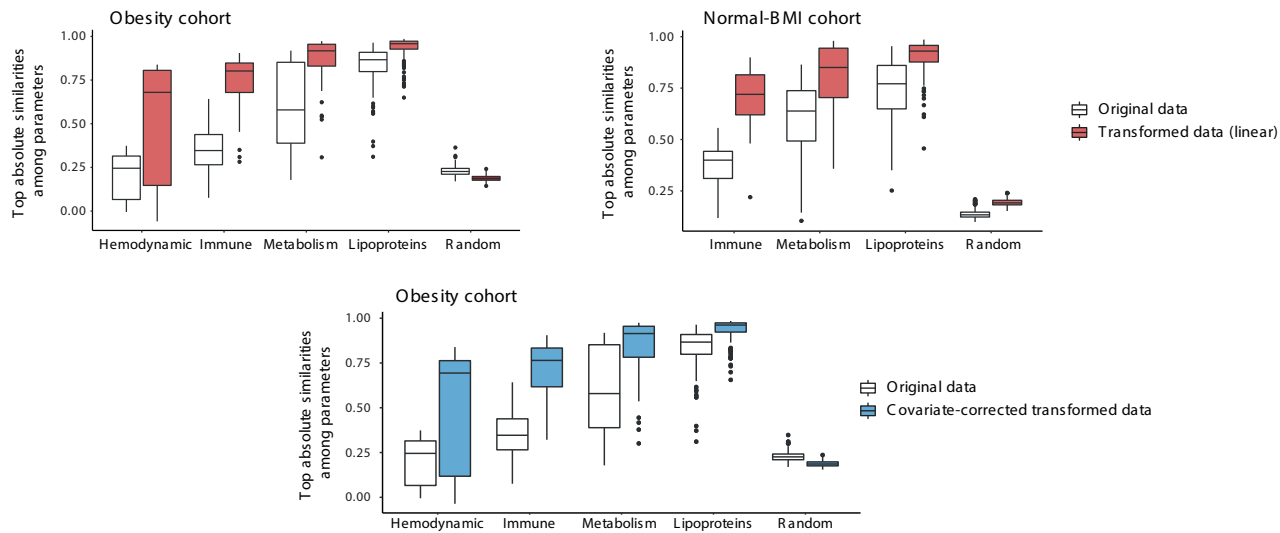

B

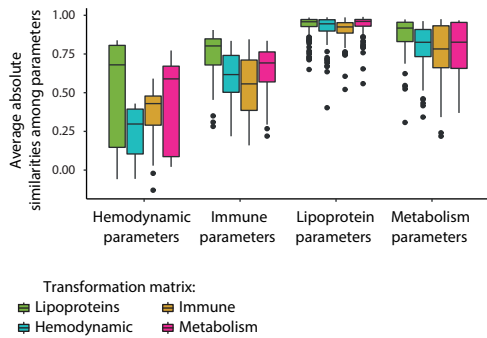

C

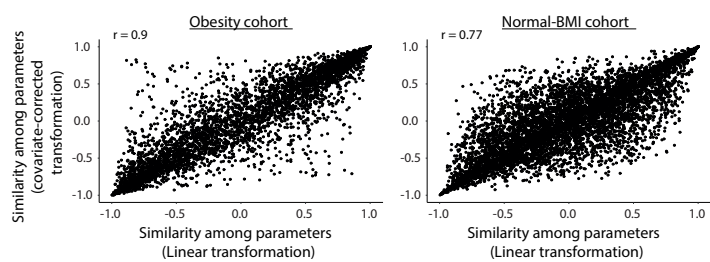

Supplement: supp [file elife-61710-supp-v1.zip › elife_poa_e61710_Figure_1_figure_supplement_5.pdf]

Figure 2 - Supplement 1

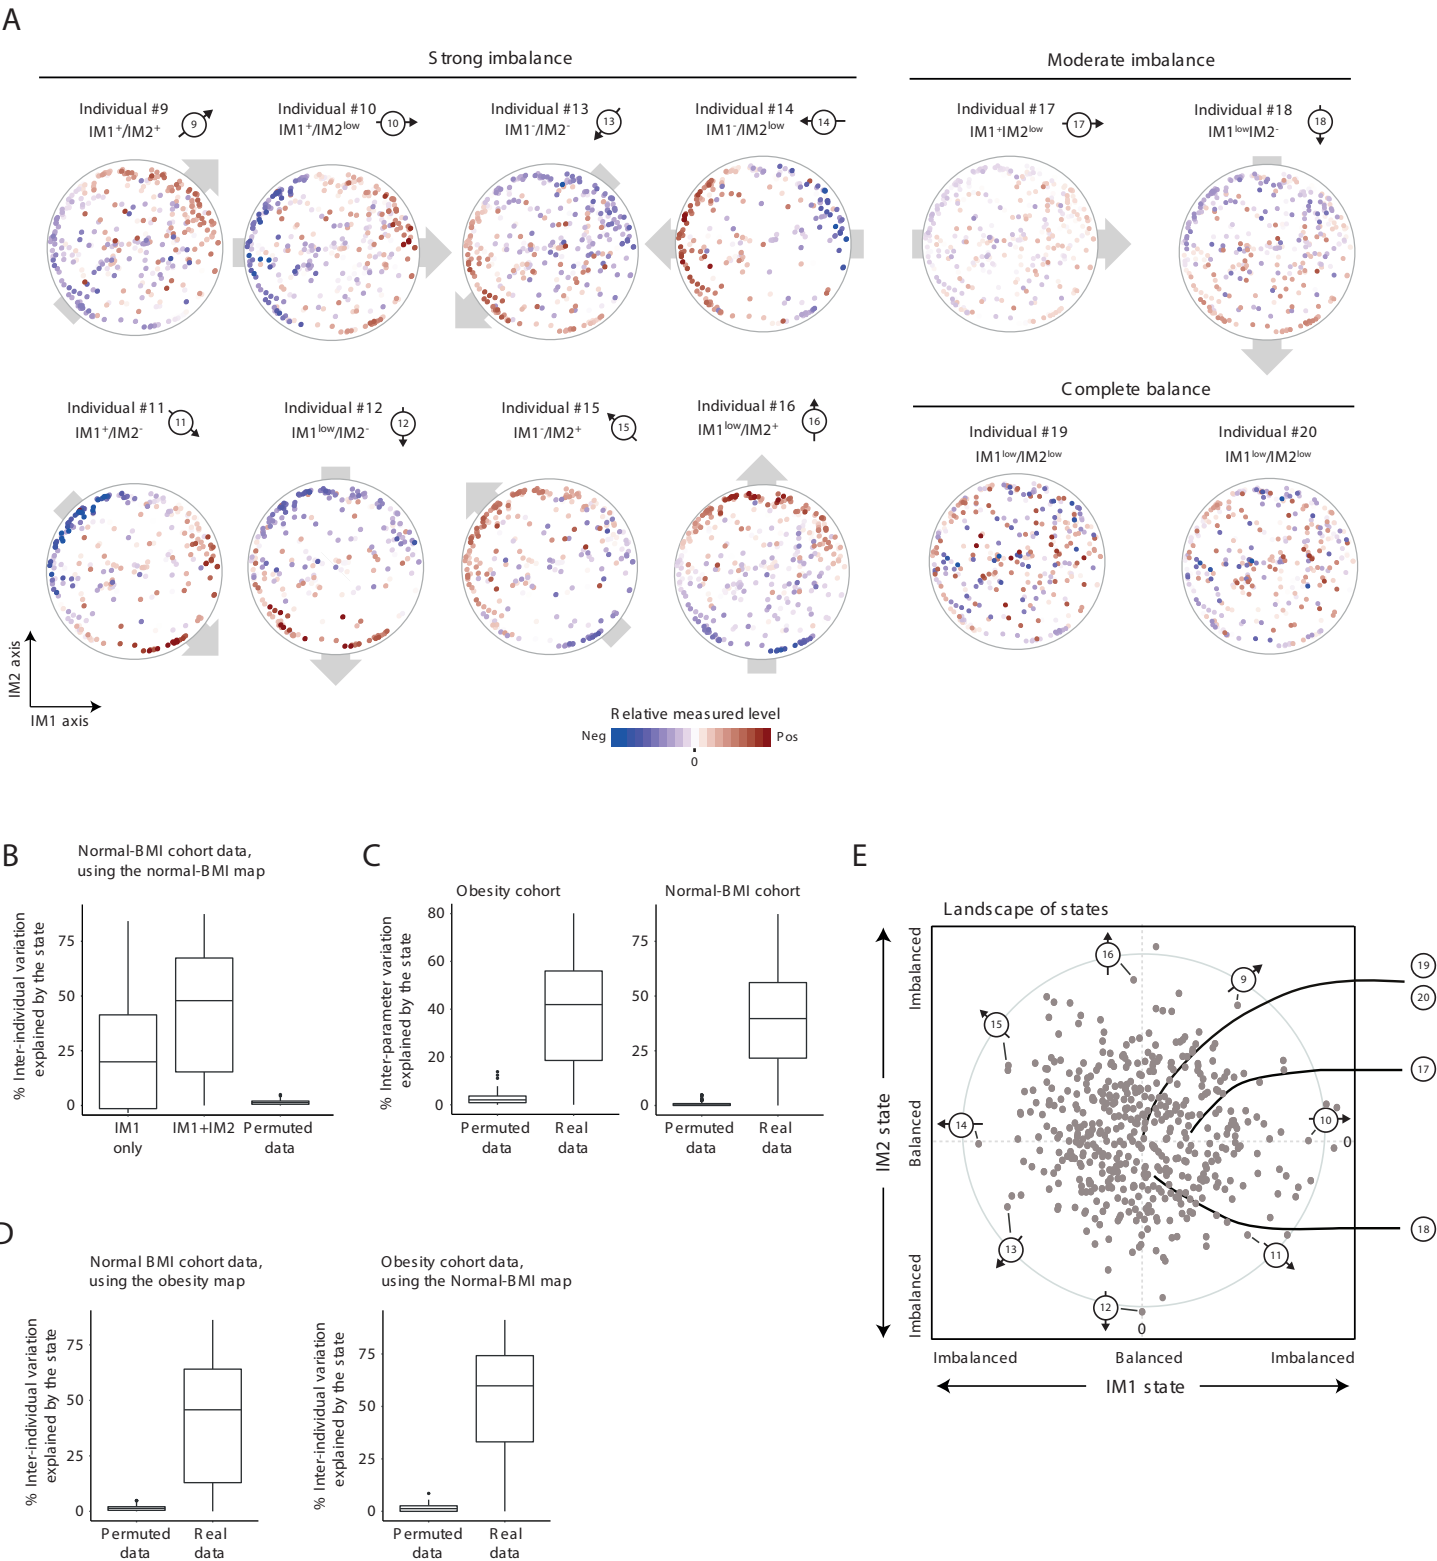

Supplement: supp [file elife-61710-supp-v1.zip › elife_poa_e61710_Figure_2_figure_supplement_1.pdf]

Figure 2 - Supplement 2

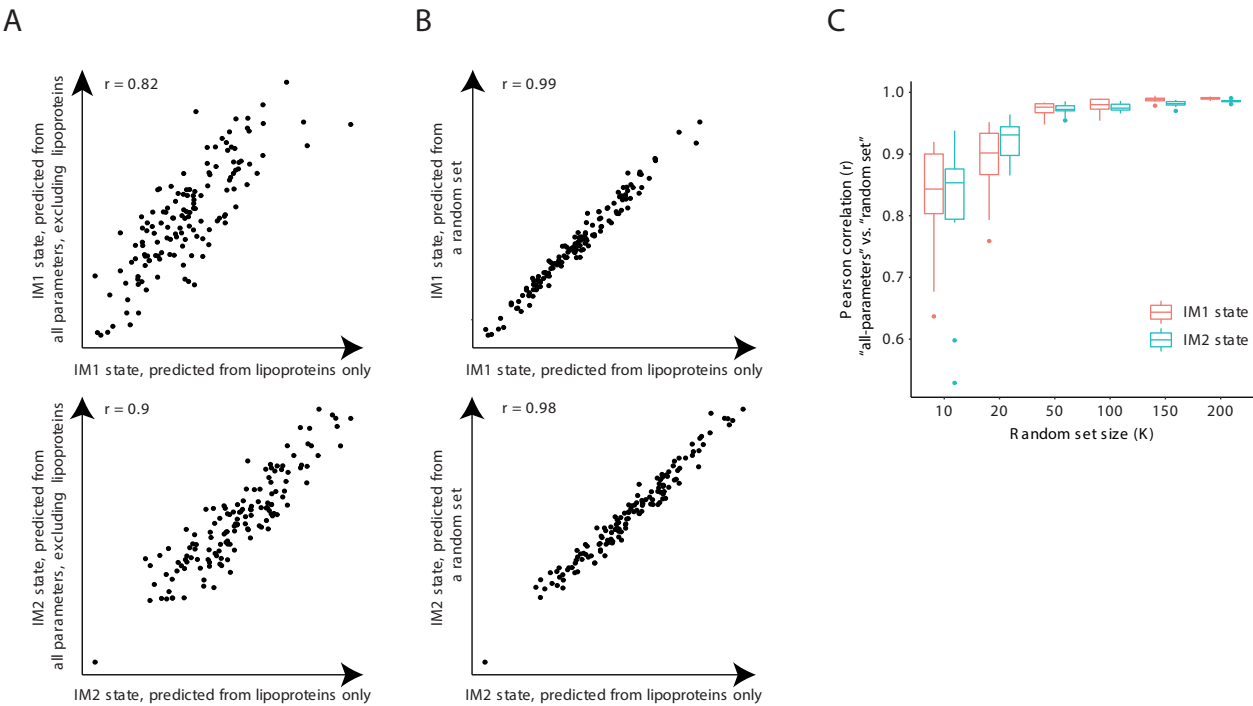

Supplement: supp [file elife-61710-supp-v1.zip › elife_poa_e61710_Figure_2_figure_supplement_2.pdf]

Figure 2 - Supplement 3

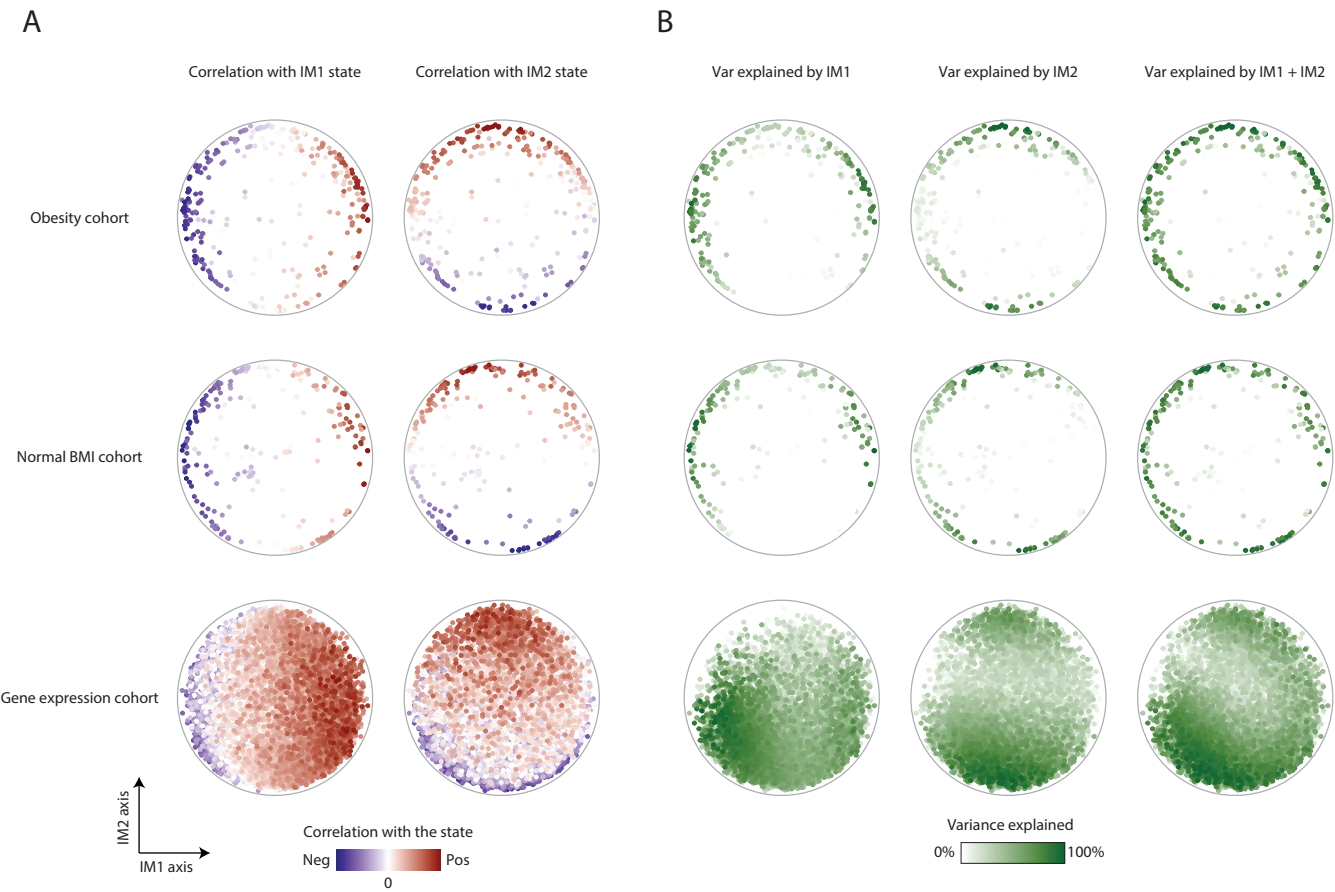

Supplement: supp [file elife-61710-supp-v1.zip › elife_poa_e61710_Figure_2_figure_supplement_3.pdf]

Figure 3 - Supplement 1

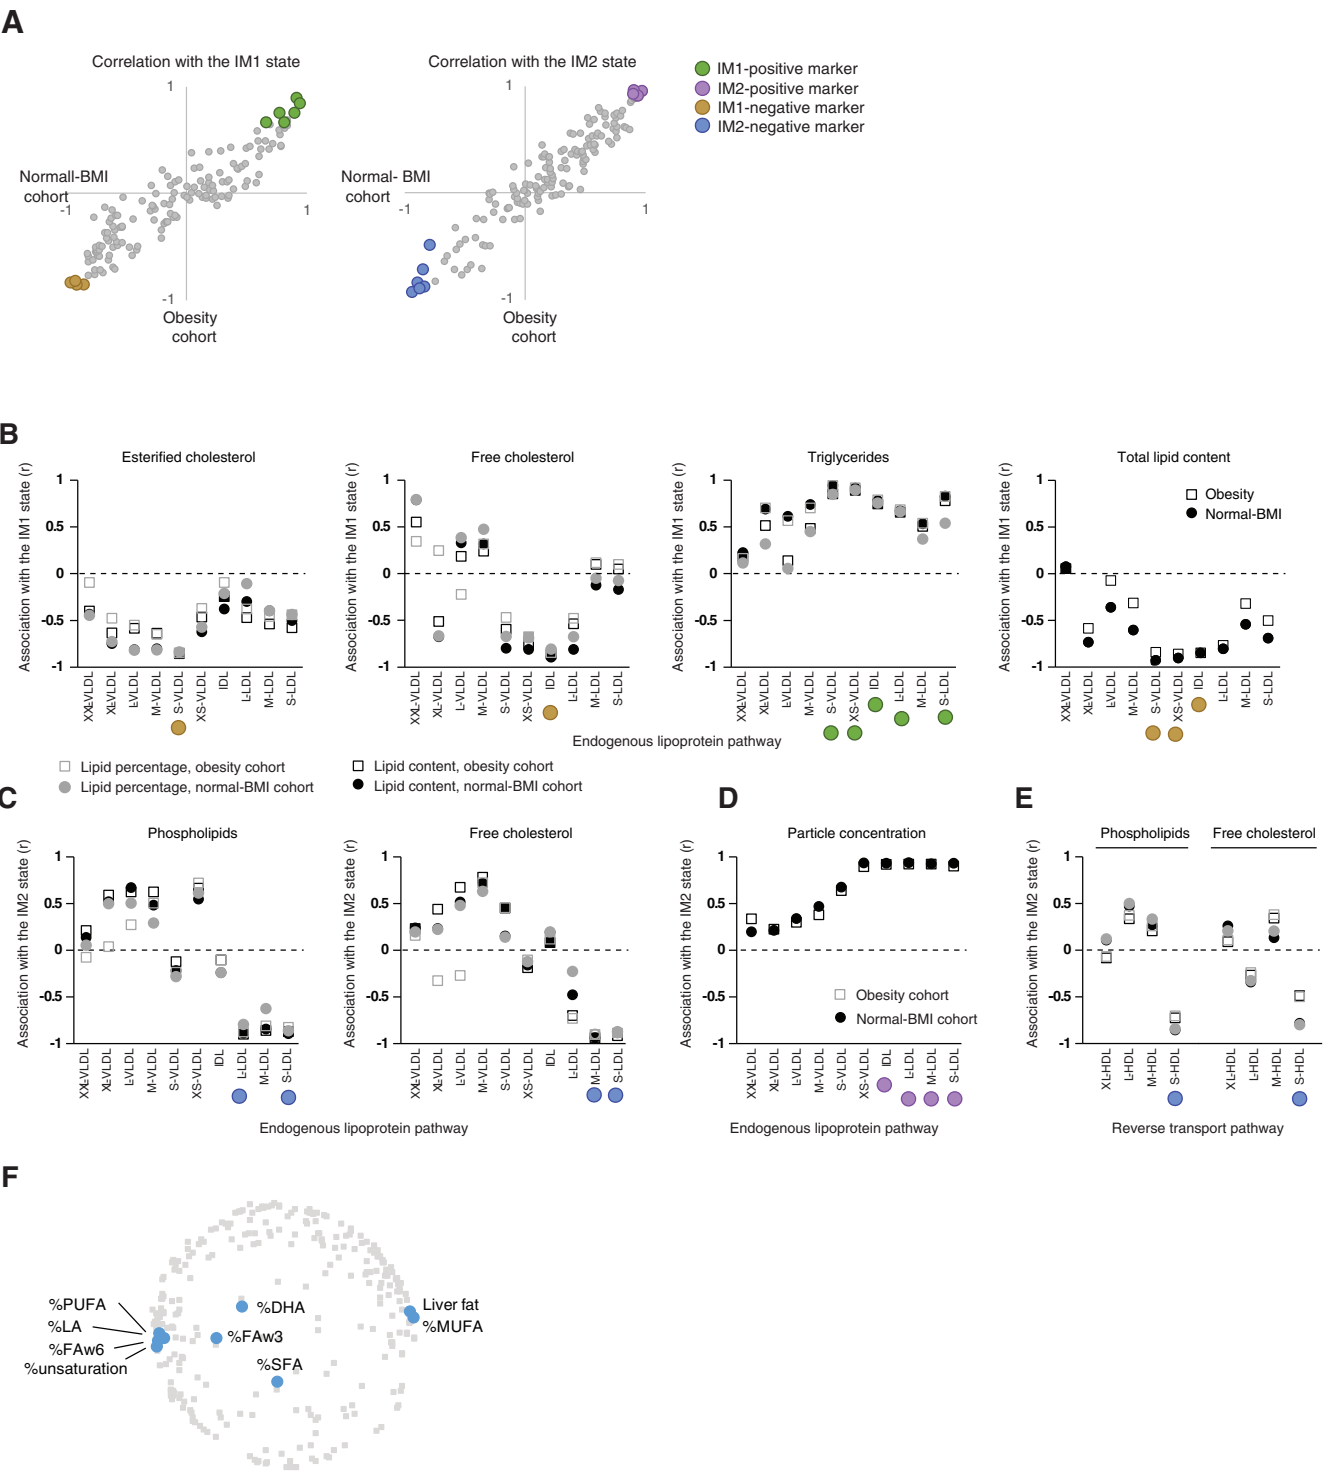

Supplement: supp [file elife-61710-supp-v1.zip › elife_poa_e61710_Figure_3_figure_supplement_1.pdf]

Figure 3 - Supplement 2

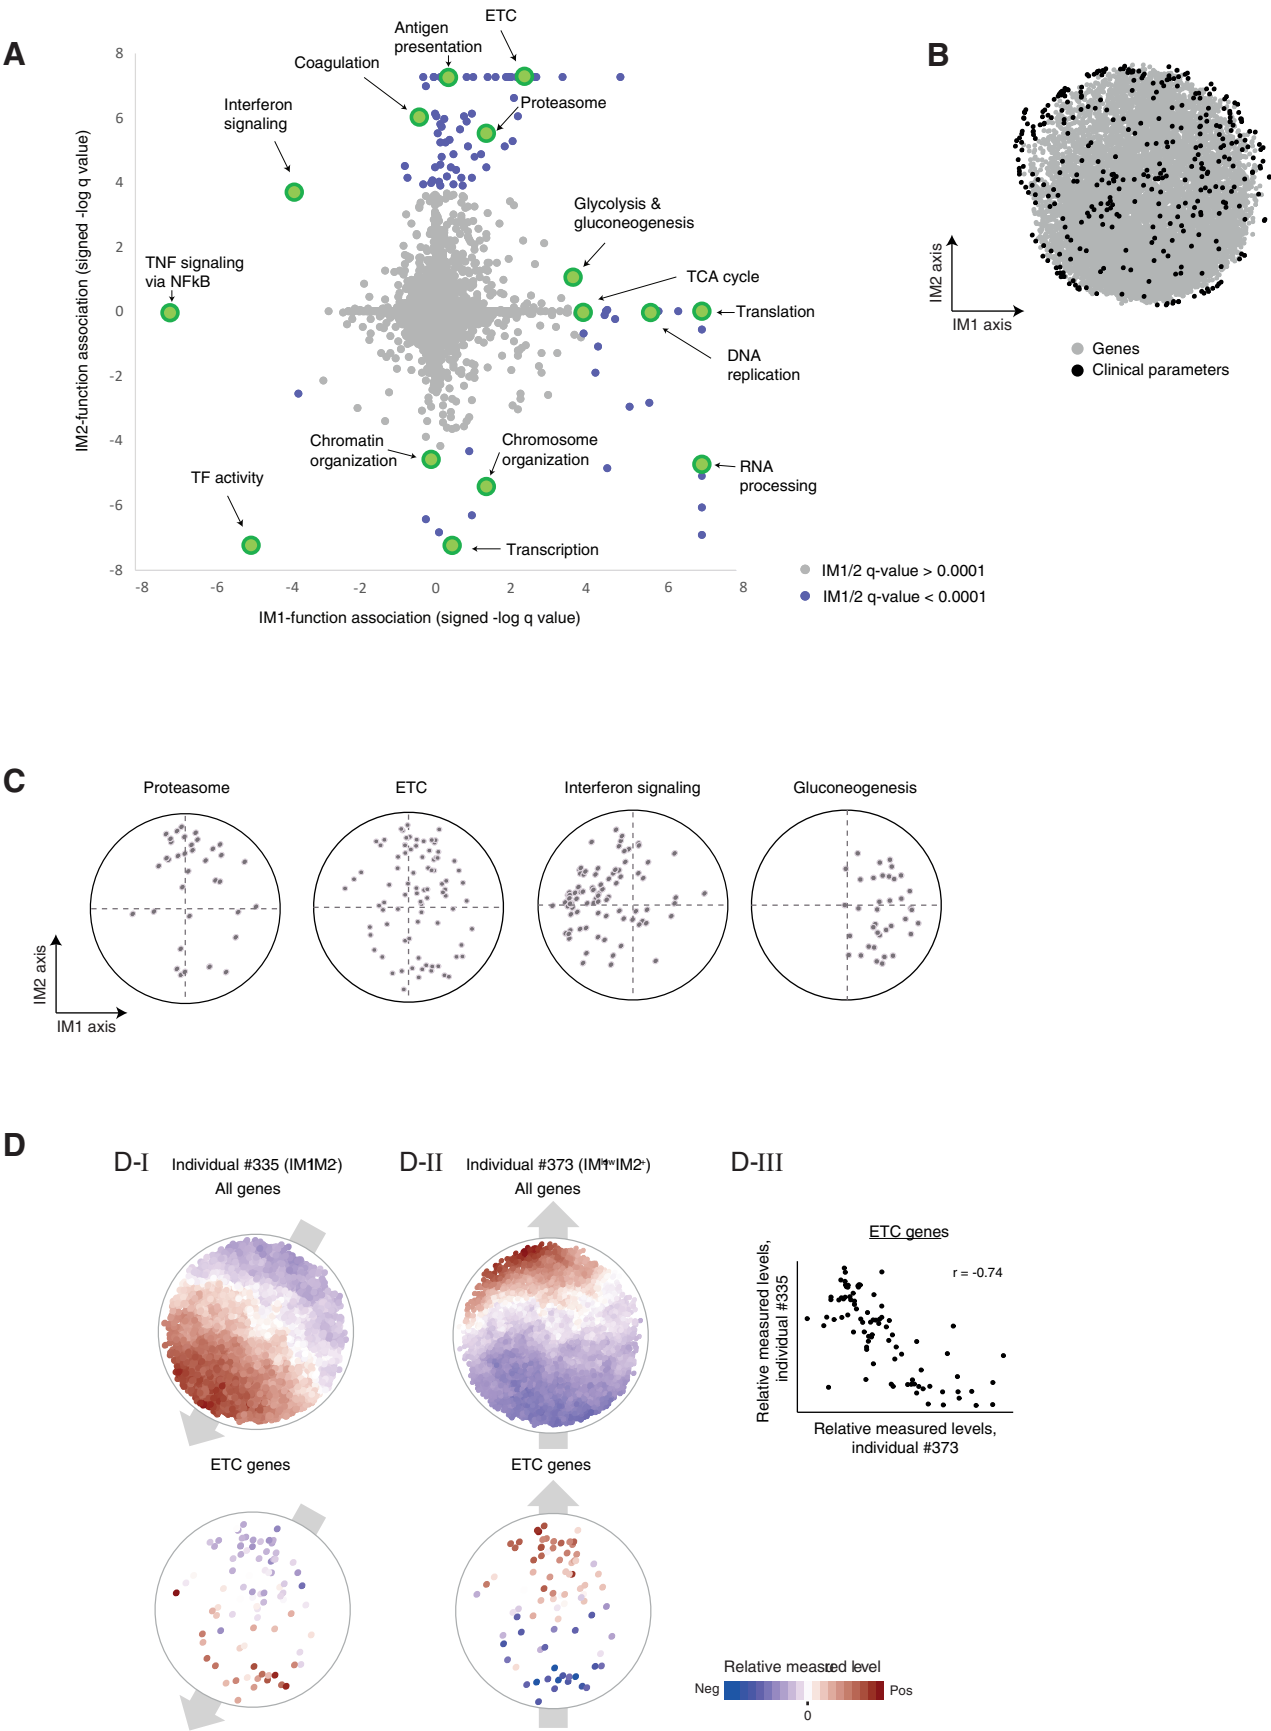

Supplement: supp [file elife-61710-supp-v1.zip › elife_poa_e61710_Figure_3_figure_supplement_2.pdf]

Figure 3 - Supplement 3

A

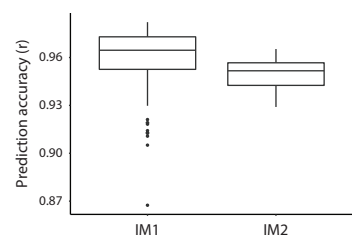

B

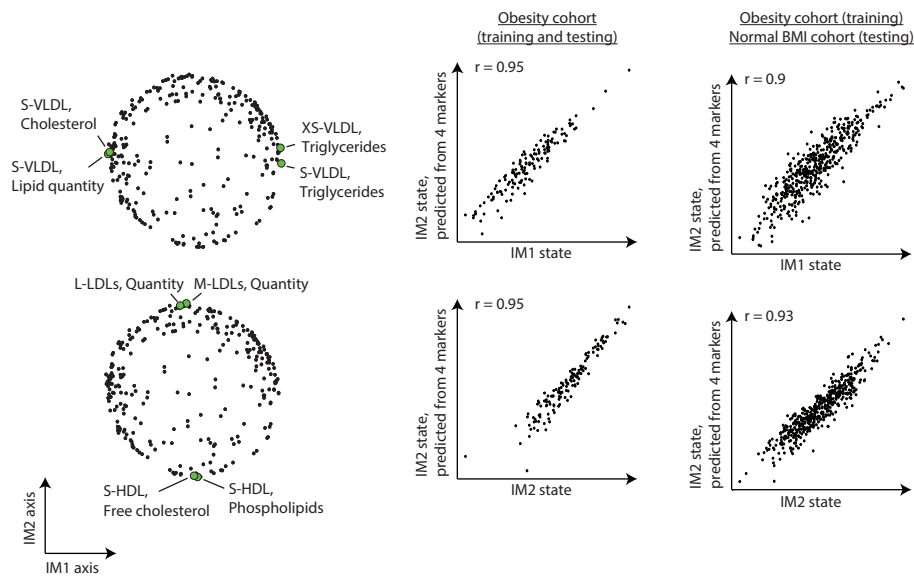

Supplement: supp [file elife-61710-supp-v1.zip › elife_poa_e61710_Figure_3_figure_supplement_3.pdf]

Figure 4 - Supplement 1

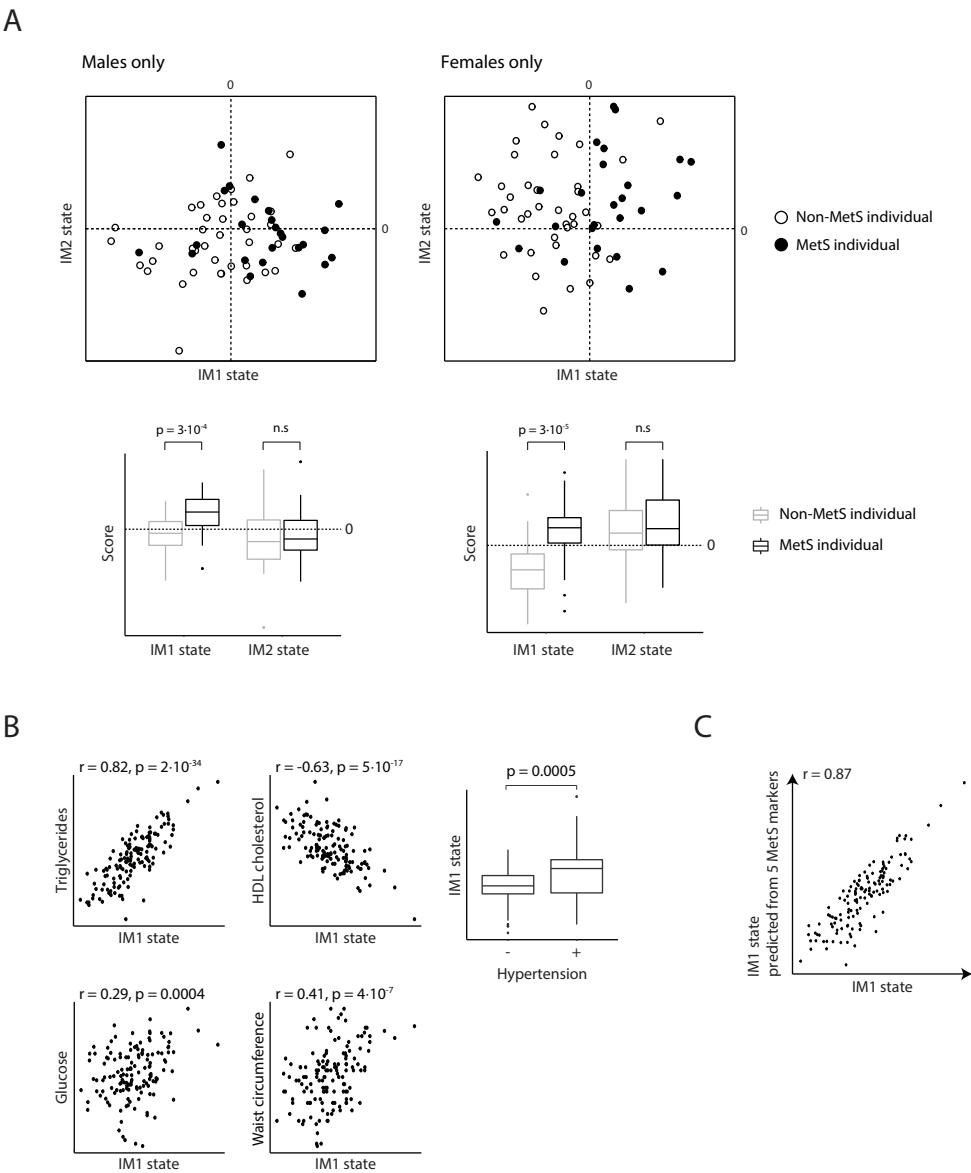

Supplement: supp [file elife-61710-supp-v1.zip › elife_poa_e61710_Figure_4_figure_supplement_1.pdf]

Figure 5 - Supplement 1

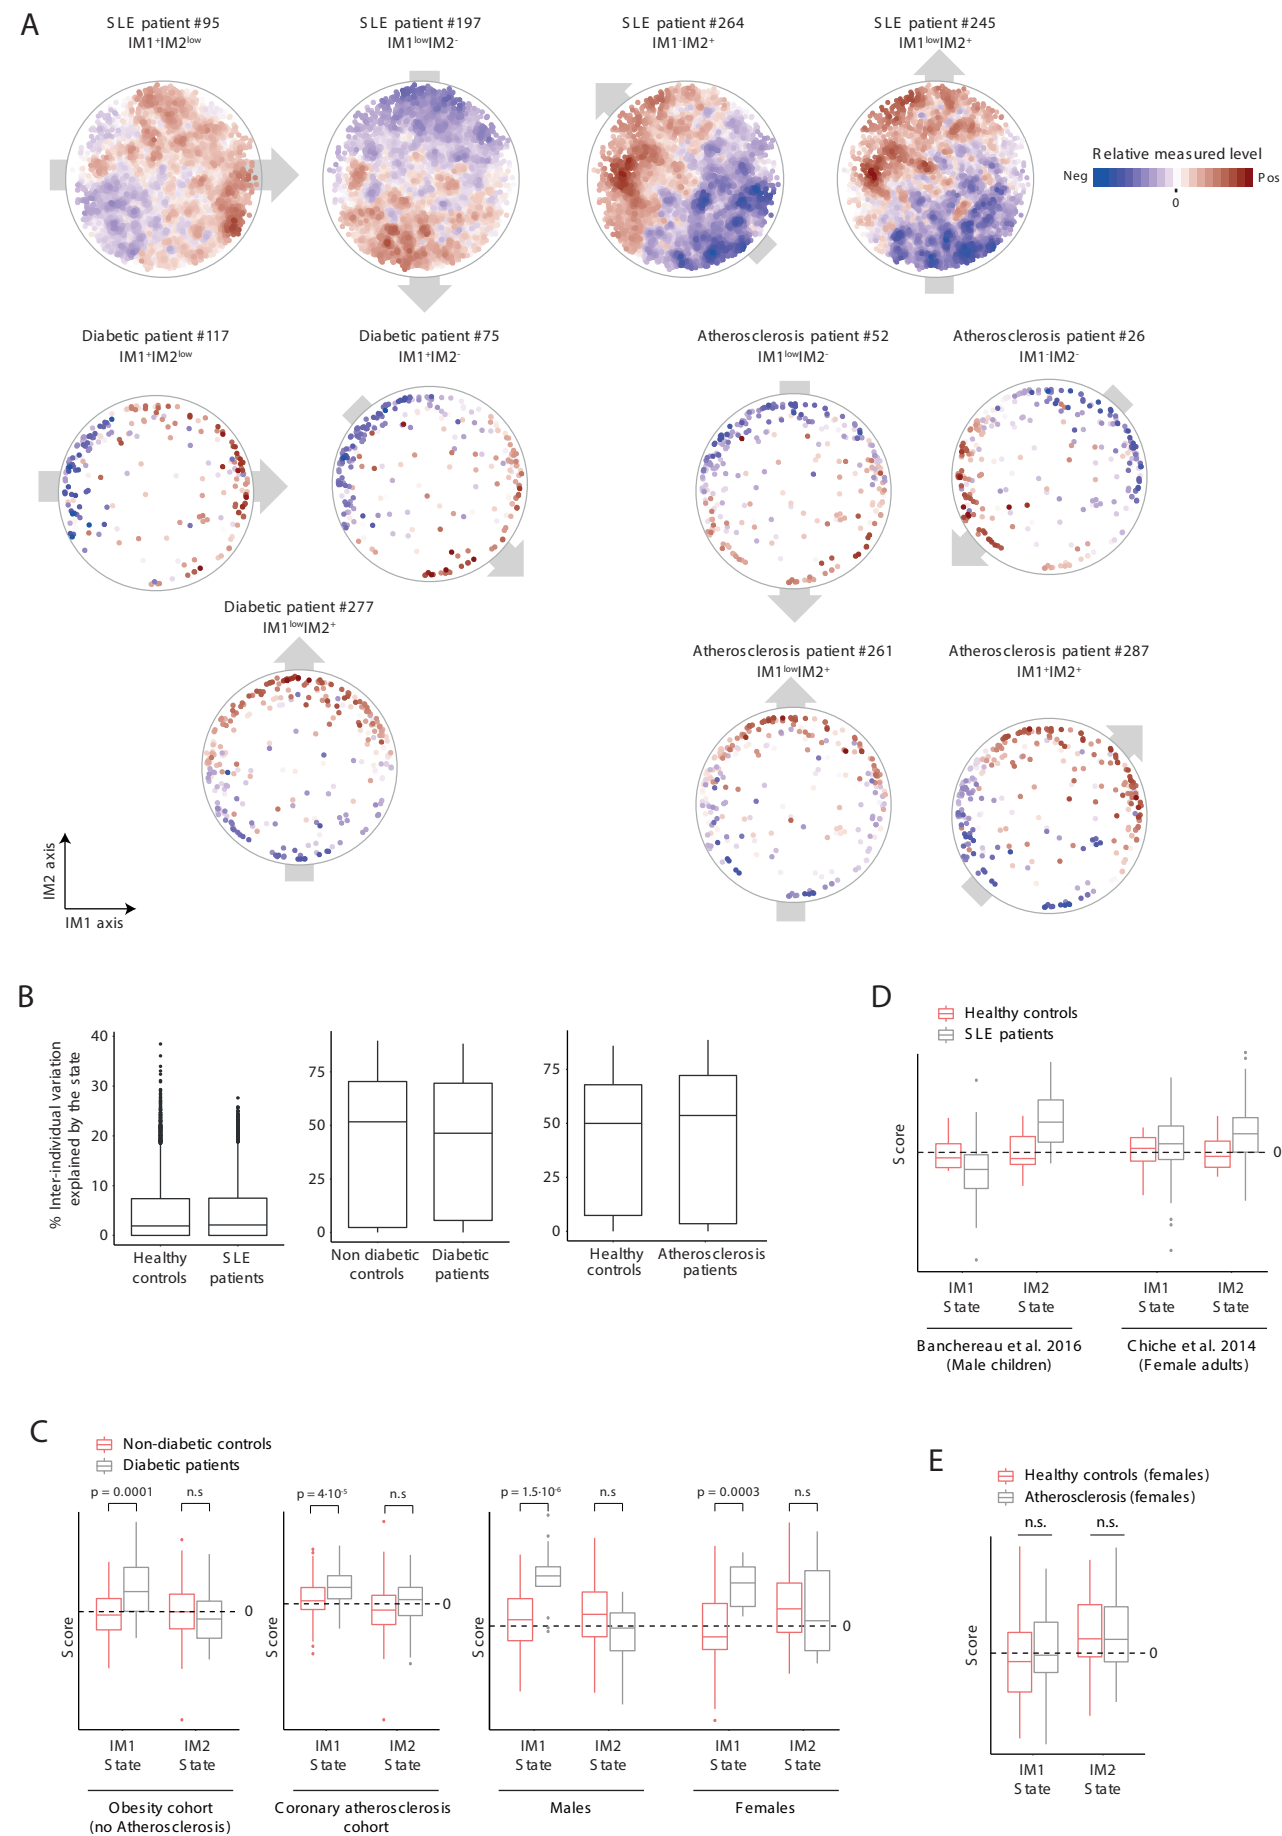

Supplement: supp [file elife-61710-supp-v1.zip › elife_poa_e61710_Figure_5_figure_supplement_1.pdf]

Figure 5 - Supplement 2

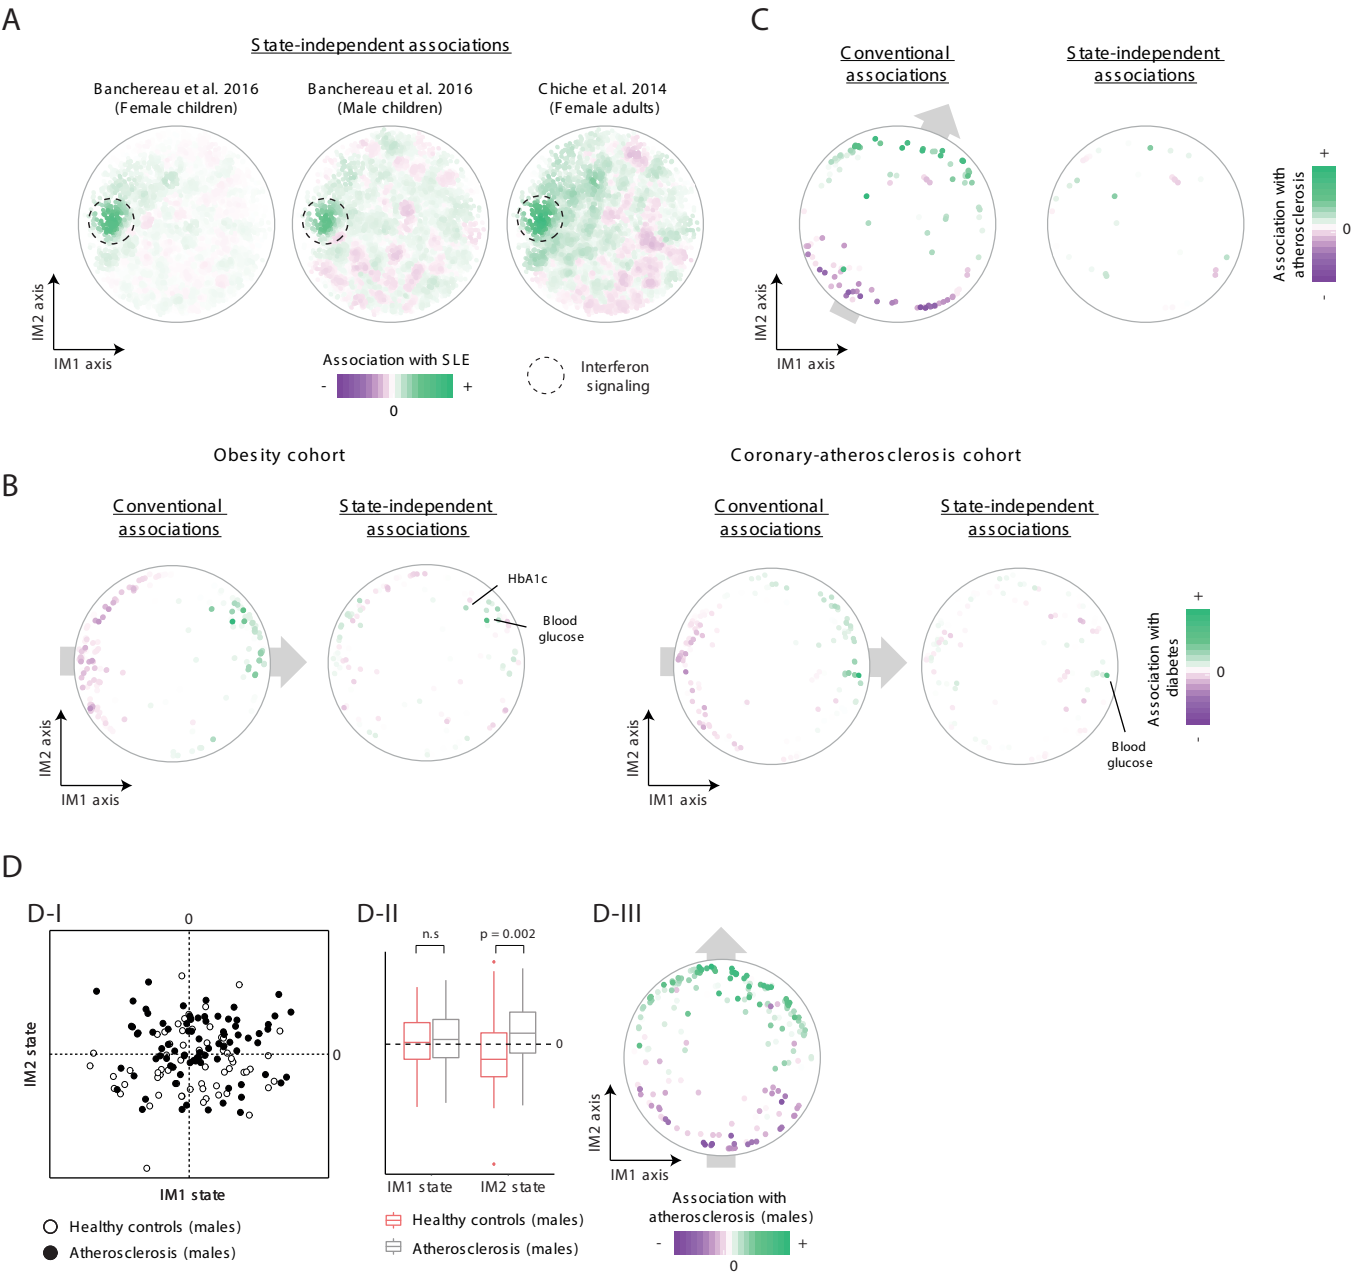

Supplement: supp [file elife-61710-supp-v1.zip › elife_poa_e61710_Figure_5_figure_supplement_2.pdf]

Figure 5 - Supplement 3

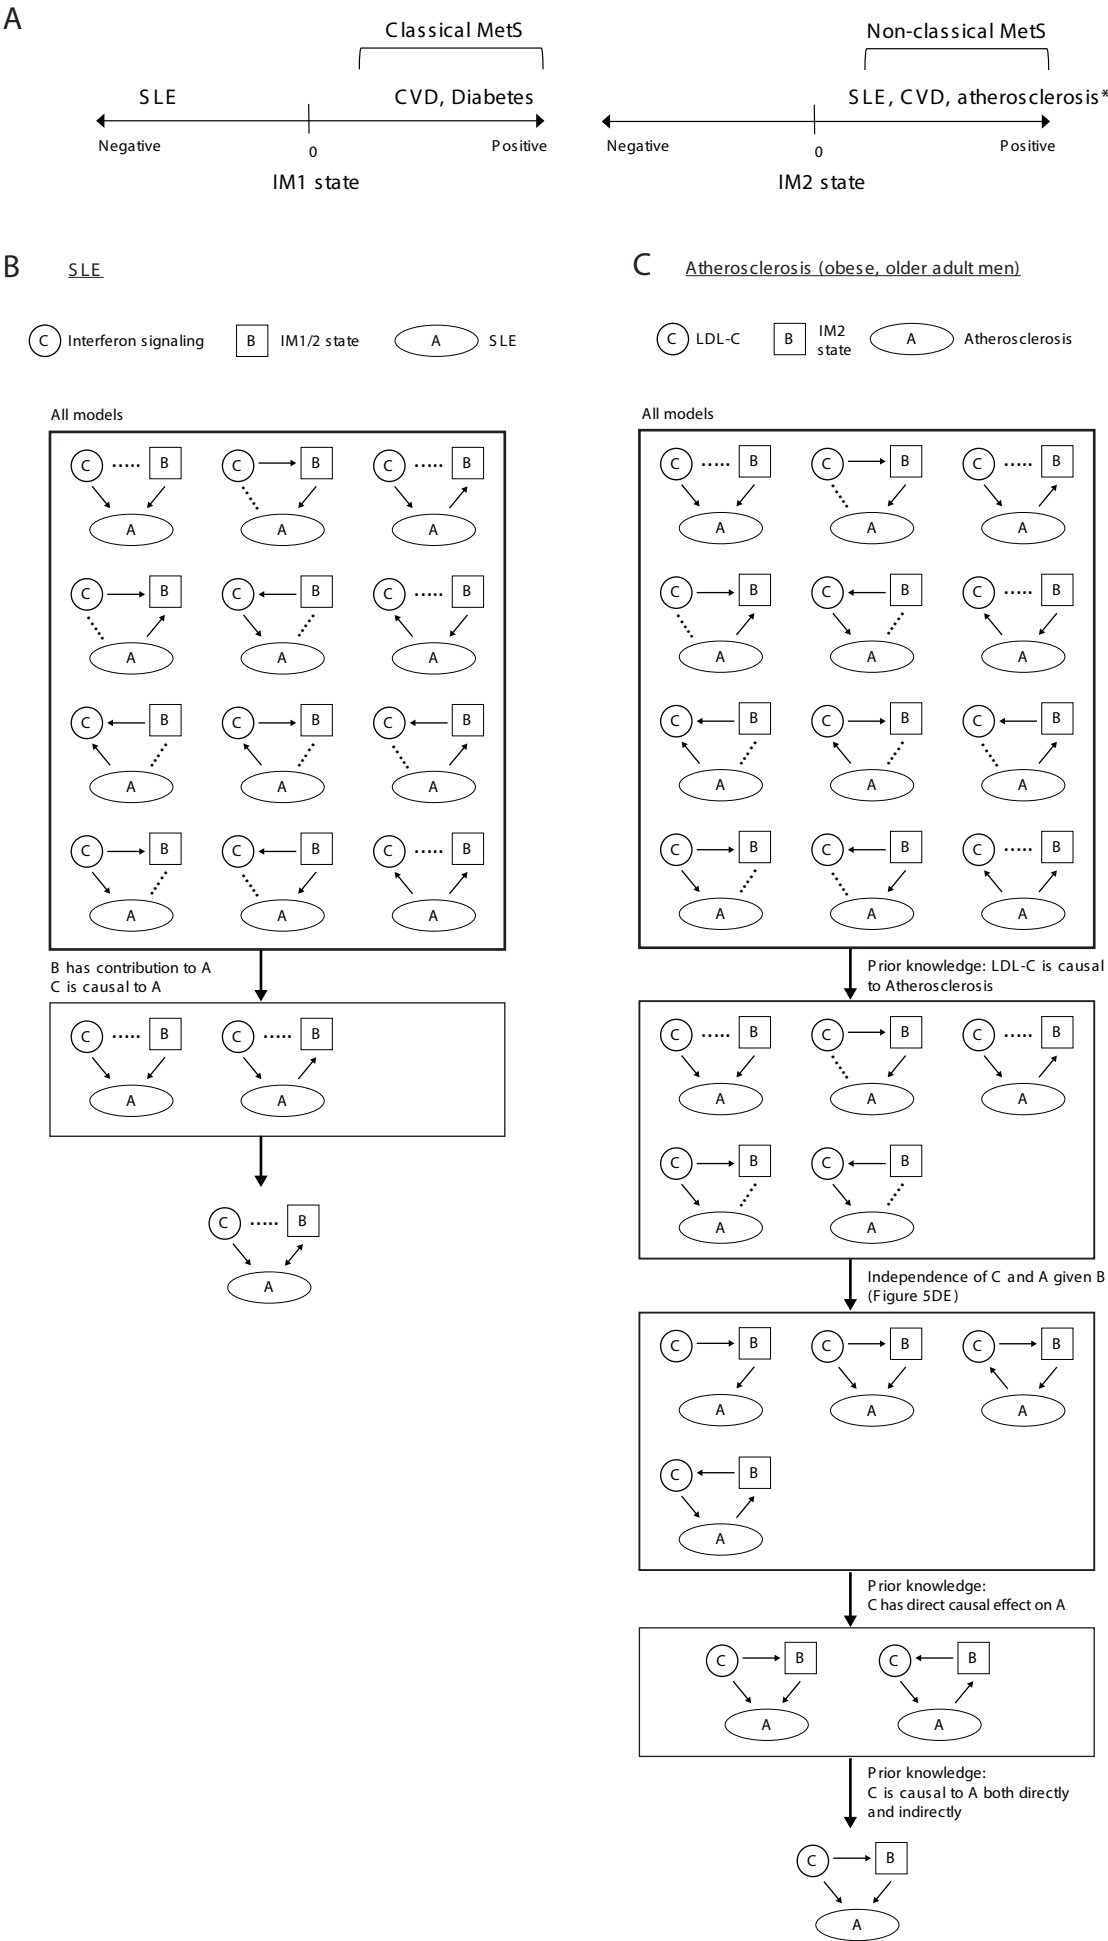

Supplement: supp [file elife-61710-supp-v1.zip › elife_poa_e61710_Figure_5_figure_supplement_3.pdf]
